# Supplementary material for: Cumulative incidence of SARS-CoV-2 infection within the homeless population: insights from a city-wide longitudinal study
Source: PubMed Central journal article supplement — BMJ Open. 2023 Feb 23;13(2):e065734. doi: 10.1136/bmjopen-2022-065734 (PMC9950589; doi:10.1136/bmjopen-2022-065734), 2023-02-23
Supplement: bmjopen-2022-065734.draft_revisions.pdf [file bmjopen-2022-065734.draft_revisions.pdf]

# BMJ Open

BMJ Open is committed to open peer review. As part of this commitment we make the peer review history of every article we publish publicly available.

When an article is published we post the peer reviewers' comments and the authors' responses online. We also post the versions of the paper that were used during peer review. These are the versions that the peer review comments apply to.

The versions of the paper that follow are the versions that were submitted during the peer review process. They are not the versions of record or the final published versions. They should not be cited or distributed as the published version of this manuscript.

BMJ Open is an open access journal and the full, final, typeset and author-corrected version of record of the manuscript is available on our site with no access controls, subscription charges or pay-per-view fees (<http://bmjopen.bmj.com>).

If you have any questions on BMJ Open's open peer review process please email [info.bmjopen@bmj.com](mailto:info.bmjopen@bmj.com)

# BMJ Open

## Cumulative incidence of SARS-CoV-2 infection within the homeless population: insights from a citywide longitudinal study

|                               |                                                                                                                                                                                                                                                                                                                                                                                                                                                                                                                                                                                                                                                                                                                                                                                                                                                                                                                                                                                                                                                                                                                                                                                                                                                                                                                                                                                                                                                                                                                                                                                                                                                                     |
|-------------------------------|---------------------------------------------------------------------------------------------------------------------------------------------------------------------------------------------------------------------------------------------------------------------------------------------------------------------------------------------------------------------------------------------------------------------------------------------------------------------------------------------------------------------------------------------------------------------------------------------------------------------------------------------------------------------------------------------------------------------------------------------------------------------------------------------------------------------------------------------------------------------------------------------------------------------------------------------------------------------------------------------------------------------------------------------------------------------------------------------------------------------------------------------------------------------------------------------------------------------------------------------------------------------------------------------------------------------------------------------------------------------------------------------------------------------------------------------------------------------------------------------------------------------------------------------------------------------------------------------------------------------------------------------------------------------|
| Journal:                      | <i>BMJ Open</i>                                                                                                                                                                                                                                                                                                                                                                                                                                                                                                                                                                                                                                                                                                                                                                                                                                                                                                                                                                                                                                                                                                                                                                                                                                                                                                                                                                                                                                                                                                                                                                                                                                                     |
| Manuscript ID                 | bmjopen-2022-065734                                                                                                                                                                                                                                                                                                                                                                                                                                                                                                                                                                                                                                                                                                                                                                                                                                                                                                                                                                                                                                                                                                                                                                                                                                                                                                                                                                                                                                                                                                                                                                                                                                                 |
| Article Type:                 | Original research                                                                                                                                                                                                                                                                                                                                                                                                                                                                                                                                                                                                                                                                                                                                                                                                                                                                                                                                                                                                                                                                                                                                                                                                                                                                                                                                                                                                                                                                                                                                                                                                                                                   |
| Date Submitted by the Author: | 15-Jun-2022                                                                                                                                                                                                                                                                                                                                                                                                                                                                                                                                                                                                                                                                                                                                                                                                                                                                                                                                                                                                                                                                                                                                                                                                                                                                                                                                                                                                                                                                                                                                                                                                                                                         |
| Complete List of Authors:     | <p>MOSNIER, Emilie; AP-HM, Department of Clinical Research and Innovation; Aix-Marseille University, 2. Aix Marseille Univ, INSERM, IRD, SESSTIM, Sciences Economiques &amp; Sociales de la Santé &amp; Traitement de l'Information Médicale, Aix Marseille Institute of Public Health ISSPAM loubiere, sandrine; APHM, Department of Clinical Research and Innovation, Support Unit for clinical research and economic evaluation; Aix-Marseille University, School of medicine – La Timone Medical Campus, EA 3279: CEReSS</p> <p>Monfardini, Elisabetta; AP-HM, Department of Psychiatry, Assistance Publique</p> <p>Alibert, Agathe; AP-HM, Department of Clinical Research and Innovation</p> <p>Landier, Jordi; IRD, 2. Aix Marseille Univ, INSERM, IRD, SESSTIM, Sciences Economiques &amp; Sociales de la Santé &amp; Traitement de l'Information Médicale, Aix Marseille Institute of Public Health ISSPAM</p> <p>Ninoves, Laetitia; Aix-Marseille University, 5. Unité des Virus Émergents (UVE: Aix-Marseille Univ—IRD 190—Inserm 1207—IHU Méditerranée Infection)</p> <p>Bosetti, Thomas; Médecins du Monde France</p> <p>AUQUIER, Pascal; Aix-Marseille University, EA 3279 (Santé Publique : Qualité de Vie et Maladies Chroniques)</p> <p>Mosnier, Marine; Médecins du Monde France</p> <p>Wakap, Stephanie Nguengang; Médecins du Monde France</p> <p>Warszawski, Josiane; CESP, CESP - Public Health; APHP</p> <p>Tinland, Aurelie; Aix-Marseille University, School of medicine – La Timone Medical Campus, EA 3279: CEReSS; APHM, Department of Clinical Research and Innovation, Support Unit for clinical research and economic evaluation</p> |
| Keywords:                     | COVID-19, EPIDEMIOLOGY, Public health < INFECTIOUS DISEASES                                                                                                                                                                                                                                                                                                                                                                                                                                                                                                                                                                                                                                                                                                                                                                                                                                                                                                                                                                                                                                                                                                                                                                                                                                                                                                                                                                                                                                                                                                                                                                                                         |
|                               |                                                                                                                                                                                                                                                                                                                                                                                                                                                                                                                                                                                                                                                                                                                                                                                                                                                                                                                                                                                                                                                                                                                                                                                                                                                                                                                                                                                                                                                                                                                                                                                                                                                                     |

SCHOLARONE™  
Manuscripts

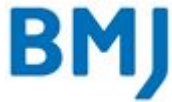

I, the Submitting Author has the right to grant and does grant on behalf of all authors of the Work (as defined in the below author licence), an exclusive licence and/or a non-exclusive licence for contributions from authors who are: i) UK Crown employees; ii) where BMJ has agreed a CC-BY licence shall apply, and/or iii) in accordance with the terms applicable for US Federal Government officers or employees acting as part of their official duties; on a worldwide, perpetual, irrevocable, royalty-free basis to BMJ Publishing Group Ltd ("BMJ") its licensees and where the relevant Journal is co-owned by BMJ to the co-owners of the Journal, to publish the Work in this journal and any other BMJ products and to exploit all rights, as set out in our [licence](#).

The Submitting Author accepts and understands that any supply made under these terms is made by BMJ to the Submitting Author unless you are acting as an employee on behalf of your employer or a postgraduate student of an affiliated institution which is paying any applicable article publishing charge ("APC") for Open Access articles. Where the Submitting Author wishes to make the Work available on an Open Access basis (and intends to pay the relevant APC), the terms of reuse of such Open Access shall be governed by a Creative Commons licence – details of these licences and which [Creative Commons](#) licence will apply to this Work are set out in our licence referred to above.

Other than as permitted in any relevant BMJ Author's Self Archiving Policies, I confirm this Work has not been accepted for publication elsewhere, is not being considered for publication elsewhere and does not duplicate material already published. I confirm all authors consent to publication of this Work and authorise the granting of this licence.

1  
2  
3 **Cumulative incidence of SARS-CoV-2 infection within the homeless population:**  
4 **insights from a citywide longitudinal study**  
5  
6  
7  
8  
9

10 Emilie Mosnier, PhD<sup>1,2\*</sup>; Sandrine Loubière, PhD<sup>1,4</sup>; Elisabetta Monfardini, PhD<sup>3</sup>; Agathe Alibert<sup>1</sup>; Jordi  
11 Landier, PhD<sup>2</sup>; Laeticia Ninoves, PhD<sup>5</sup>; Thomas Bosetti, MD<sup>6</sup>; Pascal Auquier, PhD<sup>4</sup>; Marine Mosnier<sup>6</sup>;  
12 Stephanie Nguengang Wakap, PhD<sup>7</sup>; Josiane Warszawski, PhD<sup>8</sup>; Aurélie Tinland, PhD<sup>3,4</sup>  
13  
14  
15

16 **Authors' Affiliations:**  
17

- 18 1. Department of Clinical Research and Innovation, Support Unit for clinical research and economic  
19 evaluation, Assistance Publique – Hôpitaux de Marseille, F-13385 Marseille, France
- 20 2. Aix Marseille University, INSERM, IRD, SESSTIM, Sciences Economiques & Sociales de la Santé &  
21 Traitement de l'Information Médicale, F-13385 Marseille, France
- 22 3. Department of Psychiatry, Assistance Publique – Hôpitaux de Marseille, F-13385 Marseille,  
23 France
- 24 4. Aix-Marseille University, School of medicine – La Timone Medical Campus, EA 3279: CEReSS –  
25 Health Service Research and Quality of Life Center, F-13005 Marseille, France
- 26 5. Unité des Virus Émergents (UVE: Aix-Marseille Univ—IRD 190—Inserm 1207—IHU  
27 Méditerranée Infection), F-13385 Marseille, France
- 28 6. Médecins du Monde – Doctors of the World, 13003 Marseille, France
- 29 7. Médecins du Monde – Doctors of the World, Paris, France
- 30 8. INSERM CESP U1018, Université Paris-Saclay, 94276 Le Kremlin-Bicêtre, France  
31  
32  
33  
34  
35  
36  
37  
38

39 **Corresponding author :**

40 \*Dr Emilie Mosnier, MD, PhD, SESSTIM, Sciences Economiques & Sociales de la Santé & Traitement de  
41 l'Information Médicale, 27 boulevard Jean Moulin 13005 Marseille. Email : [emilie.mosnier@gmail.com](mailto:emilie.mosnier@gmail.com).  
42 Tel : +33 4.91.32.46.00  
43  
44

45 **Word count:** 3184  
46  
47  
48  
49  
50  
51  
52  
53  
54  
55  
56  
57  
58  
59  
60

## ABSTRACT

**Objectives** The aim of this study was to determine the risk factors associated with SARS-CoV-2 infection in a cohort of homeless people using survival analysis. Seroprevalence in the homeless community was also compared to that of the general population.

**Design** Cohort Study

**Setting** Data were collected across two testing sessions, 3 months apart, during which each participant was tested for anti-SARS-CoV-2 antibodies and completed a face-to-face surveys.

**Participants** All homeless adults sleeping rough, in slums or squats, in emergency shelters or transitional accommodation in Marseille were eligible.

**Primary outcome measures** Occurrence of a seroconversion event defined as a biologically confirmed SARS-CoV-2 infection. Local data from a national seroprevalence survey were used for comparison between homeless people and the general population.

**Results** A total of 1249 people were included. SARS-CoV-2 seroprevalence increased from 6.0% [4.7-7.3] during the first session to 18.9% [16.0-21.7] during the second one, compared to 3.0% [1.9-4.2] and 6.5% [4.5-8.7] in the general population. Factors significantly associated with an increased risk of COVID-19 infection were: having stayed in emergency shelters (1.93 [1.18 – 3.15]), being an isolated parent (1.64 [1.07-2.52]) and having contact with more than 5-15 people per day (1.84 [1.27 – 2.67]). By contrast, smoking (0.46 (0.32 – 0.65)), having financial resources (0.70 (0.51 – 0.97)) and psychiatric or addictive comorbidities (0.52 (0.32 – 0.85)) were associated with a lower risk.

**Conclusion** We confirm that homeless people have higher infection rates than the general population, with increased risk in emergency shelters. There is growing evidence that, in addition to usual preventive measures, public policies should pay attention to adapt the type of accommodation and overall approach of precariousness.

## Data availability statement

The datasets generated and analyzed during the current study are not publicly available due to special authorization to transfer databases given by the CNIL. Upon prior authorization by the CNIL, the dataset would be available from the corresponding author upon reasonable request. Additionally, the study protocol is available upon request. All data requests should be addressed to the corresponding author.

## Strengths and limitations of this study

- Description of risk factors of SARS-CoV-2 infection in a large study population with high-quality and statistically robust methodology.
- First surveillance data from a cohort of homeless people providing an incidence rate of seroconversion and comparing seroprevalence with the general population at two different time points.
- Studies showed high prevalence of SARS-CoV-2 among homeless people in shelters, but no longitudinal studies confirmed these findings, put them into perspective, or considered homeless populations beyond shelters.
- Quantification of the excess risk associated with staying in emergency shelters and among the most economically vulnerable
- Characteristics of study participants upon inclusion and at the end of follow-up were also different, roofless and younger populations were most frequently lost to follow-up because of a higher mobility.

## Keywords

Homeless population, COVID-19, cohort study, seroprevalence, prevalence, SARS-CoV-2

## INTRODUCTION

The crisis generated by the COVID-19 pandemic suddenly widened the gap in access to healthcare, especially for vulnerable populations [1]. Before the pandemic, homelessness was already associated with higher health inequalities compared to the general population [2].

Public policies had to devise new strategies to limit the impact of the evolving pandemic on healthcare systems and societies. For example, the French Government imposed 2 stringent lockdowns in 2020. These restrictions were accompanied in most cities by a sheltering program for homeless people, with allocation of extra emergency shelters, transitional accommodations and requisitioned hotels [3]. In parallel however, there was a rise of precariousness in France, with an increase in the number of homeless people [4,5]. Studies show that homeless people are at high risk of developing SARS-CoV-2 infection due to physical proximity, crowded emergency shelters and unsafe or unhygienic living conditions [6,7]. In this context, data on the spread of the SARS-CoV-2 virus and immunity among the homeless are essential to inform policy stakeholders and to contain epidemic dynamics.

In France, in May 2020, a nationwide study in the general population estimated that seroprevalence ranged from 3.5% (South East of France) to 10.8% (North East of France) [8], emphasizing the need for regionally specific data. This seroprevalence reflected the regional heterogeneity at the beginning of the pandemic. A high prevalence rate of SARS-CoV-2 infection was reported in people living in homeless shelters [7,9,10], which also showed a high rate of severe COVID-19 symptoms, potentially due to a lack of access to the health care and a high prevalence of comorbidities such as lung or heart diseases [11–13]. To our knowledge, there is no representative data of an entire homeless population to describe the dynamics of the prevalence of SARS-CoV-2 infection over time.

The aim of this study was to determine the risk factors associated with SARS-CoV-2 infection in a cohort of homeless people using survival analysis. Seroprevalence in the homeless community was also compared to that of the general population.

## METHODS

### Study Design

The present study was a descriptive and prospective cohort. Study design, participants and sampling were described in a previous study [14].

### Study Area and Population

The study area was the city of Marseille, the second largest city in France with 889,029 inhabitants, suffering from a high level of poverty [15].

#### Eligible population

Data from the local orientation system for emergency and transitional accommodation (SIAO) and the NGO Doctors of the World estimated that in 2020, at the beginning of the COVID-19 outbreak, there were 2,322 homeless adults living in emergency, transitional shelters or hostels and 619 to 817 living in squats or slums (Supplementary Table 1). No point-in-time census was available for people living on the streets in Marseille.

#### Inclusion criteria

In order to focus on the homeless people the furthest from housing, we decided to select those characterized by the greatest residential instability: people sleeping rough, in squats or slums, in stabilization shelters, in emergency shelters or hostels, respectively corresponding to the following categories of the European typology of homelessness (ETHOS): ETHOS 1, 2, 3 and 8 [16].

#### Participant selection

In the absence of a point-in-time count, random sampling was impossible. We set a 2-month inclusion period, during which we systematically offered all homeless people aged over 18 to participate in the study. Recruitment of participants was also facilitated by the “Accès aux Soins des Sans Abris (ASSAb) network” of assistance to homeless people: 18 homeless outreach teams working in streets, hotels, squats or slums, 5 emergency shelters and 10 transitional accommodations.

#### Investigations

Two specific sessions of serological testing were conducted in order to assess seroprevalence. The first session lasted from June 5 to August 5, 2020, and the second from September 11 to December 18, 2020. At each session, each participant was tested using a rapid diagnostic serological test, and completed a face-to-face survey investigating: socio-demographic characteristics; comorbidities; past and current medical history of COVID-19; difficulties in access to care, water, food or hygiene supplies; compliance with the preventive measures (social

1  
2  
3 distancing, wearing a face mask, and hand washing). Questions were asked by trained local interviewers in the  
4 participants' native language to improve comprehension and to minimize the information bias.  
5

### 6 **Community Engagement and Medical Care**

7 Community awareness interventions were conducted during the two testing sessions, to secure the commitment  
8 and participation of a majority of homeless people. Community engagement started by meetings with the  
9 community leaders or mediators but also the healthcare workers and the members of local institutions or NGOs  
10 implicated in health for homeless people with the help of a local network (ASSAB) in charge of coordination  
11 with these different stakeholders. Interviewers were sensitized to the study objectives, interventions and expected  
12 role of the community. A mobile team including an infectious disease specialist, a nurse and a community  
13 mediator followed the positive cases.

### 14 **Field Biological Analysis**

15 We used the rapid serological test "Biosynex COVID-19 BSS<sup>®</sup>", that detects immunoglobulin M (IgM) and G  
16 (IgG) in 10 minutes with high specificity and sensitivity (>95% and 90% respectively) [17].  
17

### 18 **Data Analysis**

19 Descriptive analyses of sociodemographic characteristics were performed using numbers and percentage for  
20 categorical data, or medians and interquartile range (IQR) for quantitative data. The seroprevalence of COVID-  
21 19 infection was investigated between February 1, 2020 and December 18, 2020. All the participants were  
22 considered to have a negative serology on February 1, 2020 before the first cases were detected in early March  
23 2020 in Marseille. In the event of seroconversion, infection was reported as confirmed at the time of serological  
24 testing, with the possibility of overestimating the number of person-days before infection. This methodological  
25 choice was made in relation to the different predictive variables also collected at the time of the serological test.  
26 To assess seroprevalence rate according to presence or absence of symptoms, bootstrap resampling approach  
27 with a set of 1,000 samples was used to create 95% confidence intervals (CI) based on IgM/IgG sensitivity and  
28 specificity and their 95%CI. Kaplan-Meier methods along with the log rank test were used to establish statistical  
29 differences in seroprevalence rates between types of ETHOS accommodation [16]. A Cox model was performed  
30 using both baseline covariates and time-dependent covariates. Time-dependent covariates were the following:  
31 type of ETHOS accommodation (i.e. street, emergency shelters, hotels, transitional shelter or squat/slum), type  
32 of accommodation (private or shared room/area), number of contacts per day, having financial resources and  
33 having work. We fitted a multivariate Cox model by considering as eligible variables those that were significant  
34 in a univariate analysis at the 10% level, and considering all pairwise interactions. The covariate "number of  
35 contacts per day" was forced into the model as it was considered to be a relevant variable. Then, we used the  
36 Stepwise selection function in R, which starts with an empty model and adds/removes predictors according to  
37 AIC criteria. Unadjusted and adjusted Hazard ratios (HR) and 95 % CI were given.

38 All of the statistical analyses were carried out using R software, and differences with p values of <0.05 were  
39 considered statistically significant.

40 Seroprevalence data of our study were compared with data from a representative sample of the general  
41 population living in Marseille, which were derived from a national seroprevalence survey (EpiCov) [18]. Results  
42 of seroprevalence in the general population were obtained from home self-samples of dried blood spots, in order  
43 to detect IgG antibodies (Euroimmun ELISA-S) [18].

44 All the confirmed cases of COVID-19 by positive SARS-CoV-2 PCR in Marseille registered from January 1 to  
45 December 31, 2020, by the French national monitoring department (SI-DEP) from *Santé Publique France* [19],  
46 were used to describe the local incidence rate of COVID-19 infection in cases per person-weeks.

47 **Patients and public involvement:** Public were involved in conduct (questionnaire were conducted by peer  
48 workers) and dissemination plans of this research (the results were presented to the public via photo and sound  
49 exhibitions and radio broadcasts in Marseille city).  
50

## 51 **RESULTS**

52  
53 During the first session from June 5 to August 5, 2020, 1241 people were included. Median age was 38  
54 years [IQR 22], 70.40% were men (n=874) with 98 (8.1%) of participants living rough, 358 (29.5%) in  
55 emergency shelters, 197 (16.2%) in hostels, 196 (16.2%) in transitional shelters, and 363 (29.9%) in squats and  
56 slums (Table 1). Around half of the participants, 52.2% (n=648/1241), had confirmed or possible risk factors for  
57 severe COVID-19 disease, including cancer, obesity, cardiac or pulmonary disease and severe renal  
58 insufficiency. In addition, half of the participants (52.0%, n=645) reported active tobacco consumption. A total  
59 of 58.1% (n=721) of the participants tested during the first session were also tested at the second session.  
60

**Table 1: Population characteristics (n=1241)**

| <i>Baseline characteristics</i> |                                        | <b>n (%) or median [IQR]</b> |
|---------------------------------|----------------------------------------|------------------------------|
| Gender                          |                                        |                              |
|                                 | Men                                    | 874 (70.4%)                  |
|                                 | Women                                  | 367 (29.6%)                  |
| Age, median, years              |                                        | 38 [22]                      |
| Age <= 65 years                 |                                        | 1179 (95.0%)                 |
| French Nationality              |                                        | 222 (18.4%)                  |
| Country of Birth                |                                        |                              |
|                                 | France                                 | 234 (18.9%)                  |
|                                 | Europe                                 | 416 (33.5%)                  |
|                                 | Africa                                 | 282 (22.7%)                  |
|                                 | Other                                  | 279 (22.5%)                  |
|                                 | Missing                                | 30 (2.4%)                    |
| Educational attainment          |                                        |                              |
|                                 | None                                   | 560 (45.1%)                  |
|                                 | Lower secondary                        | 445 (35.9%)                  |
|                                 | Upper secondary or vocational          | 122 (9.8%)                   |
|                                 | Missing                                | 114 (9.2%)                   |
| Household status                |                                        |                              |
|                                 | Isolated adult                         | 660 (53.2%)                  |
|                                 | Isolated parent                        | 129 (10.4%)                  |
|                                 | Family                                 | 411 (33.1%)                  |
|                                 | Missing                                | 41 (3.3%)                    |
| Health insurance                |                                        |                              |
|                                 | No                                     | 345 (27.8%)                  |
|                                 | Yes                                    | 826 (66.6%)                  |
|                                 | Missing                                | 70 (5.6%)                    |
| Financial resources             |                                        |                              |
|                                 | No                                     | 448 (36.1%)                  |
|                                 | Yes                                    | 730 (58.8%)                  |
|                                 | Missing                                | 63 (5.1%)                    |
| Working situation <sup>a</sup>  |                                        |                              |
|                                 | No                                     | 949 (76.5%)                  |
|                                 | Yes                                    | 229 (18.5%)                  |
|                                 | Missing                                | 63 (5.1%)                    |
| Total length of homelessness    |                                        |                              |
|                                 | <= 5 years                             | 775 (62.4%)                  |
|                                 | > 5 years                              | 393 (31.7%)                  |
|                                 | Missing data                           | 73 (5.9%)                    |
| Typology ETHOS*                 |                                        |                              |
|                                 | ETHOS 1: street                        | 98 (8.1%)                    |
|                                 | ETHOS 2: emergency shelters            | 358 (29.5%)                  |
|                                 | ETHOS2: hotels                         | 197 (16.2%)                  |
|                                 | ETHOS 3: transitional shelters         | 196 (16.2%)                  |
|                                 | ETHOS 8: squats, slums                 | 363 (29.9%)                  |
| Type of accommodation           |                                        |                              |
|                                 | Private room or area                   | 524 (42.2%)                  |
|                                 | Shared room or area                    | 648 (52.2%)                  |
|                                 | Missing data                           | 69 (5.6%)                    |
| Number of contacts per day      |                                        |                              |
|                                 | <= 5                                   | 714 (58.0%)                  |
|                                 | 5 to 15                                | 410 (33.3%)                  |
|                                 | >15                                    | 107 (8.7%)                   |
| Tobacco consumption             |                                        |                              |
|                                 | No                                     | 480 (38.7%)                  |
|                                 | Yes                                    | 645 (52.0%)                  |
|                                 | Missing                                | 116 (9.3%)                   |
| Comorbidity                     |                                        |                              |
|                                 | Psychiatric or addictive comorbidities | 295 (23.8%)                  |
|                                 | Obesity                                | 72 (6.5%)                    |
|                                 | Diabetes                               | 91 (8.1%)                    |
|                                 | Chronic Respiratory Pathology          | 99 (9.2%)                    |
|                                 | Cardiovascular Pathology               | 152 (14.1%)                  |
|                                 | Chronic renal failure with dialysis    | 23 (2.1%)                    |
|                                 | Cancer                                 | 24 (2.2%)                    |

SD: Standard Deviation; IQR: Inter Quartile Range.

a: declared or undeclared employment.

\*ETHOS: European Typology on Homelessness and Housing Exclusion [16]



Figure 1 aims to contextualize the study's test sessions within SARS-CoV-2 epidemics in Marseille, and shows the official incidence of COVID-19 in the city in 2020 as well as lockdown dates [19].

A total of 74/1241 of participants had positive serology in the first campaign, with 2.5% of positive IgM tests, 5.2% positive IgG tests and 1.7% positive IgM and IgG tests. In the second campaign, 136/721 of participants had positive serology with 8.1% of positive IgM tests, 17.5% positive IgG tests and 6.8% positive IgM and IgG tests.

Seroprevalence was 6.0% (IQR 4.7-7.3) (n=1241) in the first campaign and 18.9% (IQR 16.0-21.7) (n=721) in the second campaign, and had significantly increased ( $p < 0.005$ ) (Figure 2). In comparison, seroprevalence in the general population in Marseille was 3.0% [1.9-4.2] in May to June and 6.5% (CI95% 4.5-8.7) in November to December 2020 and had significantly increased ( $p < 0.005$ ) (Figure 2).

### Factors Associated with SARS-CoV-2 Infection

A total of 180 participants presented a SARS-CoV-2 seroconversion defined by a positive serology result for SARS-CoV-2 (IgM or IgG). Average time of infection from February 1, 2020 was 230 days (IQR 162-277). Figure 3 shows the Kaplan Meier curves according to the participant's type of accommodation. Homeless people living in emergency shelters and hotels had a significantly higher risk of SARS-CoV-2 infection compared to their counterparts over the study follow-up period ( $p < 0.001$ ).

Table 2 shows univariate and multivariate analysis of the factors associated with the SARS-CoV-2 seroprevalence. Univariate analysis identified an association between positive serological results and participants coming from Africa (2.51 (1.45 – 4.33)) or those applying physical distancing (1.61 (1.14 – 2.27)). These two variables were not retained in the final model. Difficult access to hygiene products was also associated with lower seroprevalence in univariate analysis (0.72 (0.52 – 0.96)) but not in multivariate analysis. Being an isolated parent (1.64 (1.07 – 2.52)), spending more than 33% (1.70 (1.11 – 2.62)) or 66% (1.93 (1.18 – 3.15)) of time living in an emergency shelter during follow-up, and having between 5 to 15 daily contacts (1.84 (1.27 – 2.67)), were associated with SARS-CoV-2 infection in multivariate analysis. By contrast, having financial resources (1.64 (1.07 – 2.52)), being a smoker at the time of the survey (0.46 (0.32 – 0.65)) and having psychiatric or addictive comorbidities (0.52 (0.32 – 0.85)) were associated with a lower risk of SARS-CoV-2 seroprevalence. Figure 4 summarizes the Cox multivariable regression analysis. Other potential risk factors, such as educational attainment, gender, age, total length of homelessness in the life of participants, wearing a mask, hand washing, difficult access to water or not having health insurance were not associated with SARS-CoV-2 prevalence.

**Table 2: Univariate and multivariable analysis of the seroprevalence of SARS-CoV-2 infection between February and December 2020 in homeless people living in Marseille**

| <i>Results</i>             |                               | Univariate analysis |                          | Multivariate analysis <sup>‡</sup> |
|----------------------------|-------------------------------|---------------------|--------------------------|------------------------------------|
|                            |                               | HR (CI95%)          | p-value                  | Adjusted HR (CI95%)                |
| Gender                     | Men                           | ref                 |                          |                                    |
|                            | Women                         | 0.97 (0.70 - 1.34)  | 0.900                    |                                    |
| Age, years                 | ≤65                           | Ref                 |                          |                                    |
|                            | >65                           | 1.66 (0.99 - 2.77)  | 0.050                    |                                    |
| Country of Birth           | France                        | ref                 |                          |                                    |
|                            | Europe                        | 1.45 (0.83 - 2.55)  | 0.193                    |                                    |
|                            | Africa                        | 2.51 (1.45 - 4.33)  | <b>0.001<sup>‡</sup></b> |                                    |
|                            | Other                         | 2.80 (1.63 - 4.79)  | <0.001                   |                                    |
| Educational attainment     | None                          | ref                 |                          |                                    |
|                            | Lower secondary               | 1.32 (0.96 - 1.82)  | 0.090                    |                                    |
|                            | Upper secondary or vocational | 1.14 (0.63 - 2.05)  | 0.670                    |                                    |
| Household status           | Isolated adult                | ref                 |                          | ref                                |
|                            | Isolated parent               | 1.78 (1.18 - 2.67)  | <b>0.006</b>             | <b>1.64 (1.07 - 2.52)</b>          |
|                            | Family                        | 0.78 (0.55 - 1.11)  | 0.168                    | 0.78 (0.50 - 1.20)                 |
| Health insurance           | No                            | Ref                 |                          |                                    |
|                            | Yes                           | 0.96 (0.69 - 1.34)  | 0.800                    |                                    |
| Having financial resources | No                            | Ref                 |                          | Ref                                |

|                                              |                    |                    |                          |                           |
|----------------------------------------------|--------------------|--------------------|--------------------------|---------------------------|
|                                              | Yes                | 0.64 (0.47 – 0.86) | <b>0.003</b>             | <b>0.70 (0.51 – 0.97)</b> |
| Having work                                  | No                 | Ref                |                          |                           |
|                                              | Yes                | 0.71 (0.45 – 1.12) | 0.110                    |                           |
| Total length of homelessness                 |                    |                    |                          |                           |
|                                              | <= 5 years         | ref                |                          |                           |
|                                              | > 5 years          | 0.95 (0.69 – 1.30) | 0.700                    |                           |
| Percent of time spent in emergency shelters* |                    |                    |                          |                           |
|                                              | <33%               | Ref                |                          | ref                       |
|                                              | 33 to 66%          | 1.68 (1.15 – 2.46) | <b>0.007</b>             | <b>1.70 (1.11 – 2.62)</b> |
|                                              | >66%               | 2.45 (1.59 – 3.76) | <b>&lt;0.001</b>         | <b>1.93 (1.18 – 3.15)</b> |
| Number of daily contacts                     |                    |                    |                          |                           |
|                                              | <=5 per day        | Ref                |                          | Ref                       |
|                                              | >5 to <=15 per day | 1.21 (0.88 – 1.65) | 0.100 <sup>£</sup>       | <b>1.84 (1.27 – 2.67)</b> |
|                                              | >15 per day        | 0.68 (0.33 – 1.40) | 0.200                    | 1.45 (0.69 – 3.04)        |
| Wearing mask                                 | No, somewhat no    | Ref                |                          |                           |
|                                              | Yes, somewhat yes  | 1.23 (0.85 – 1.78) | 0.300                    |                           |
| Physical distancing                          | No, somewhat no    | Ref                |                          |                           |
|                                              | Yes, somewhat yes  | 1.61 (1.14 – 2.27) | <b>0.007<sup>£</sup></b> |                           |
| Hand washing                                 | No, somewhat no    | ref                |                          |                           |
|                                              | Yes, somewhat yes  | 1.43 (0.99 – 2.06) | 0.060                    |                           |
| Difficult access to hygiene products         | No, never, rarely  | Ref                |                          | ref                       |
|                                              | Yes, always, often | 0.72 (0.52 – 0.96) | <b>0.040</b>             | 0.75 (0.50 – 1.12)        |
| Difficult access to water                    | No, never, rarely  | Ref                |                          |                           |
|                                              | Yes, always, often | 0.76 (0.54 – 1.09) | 0.100                    |                           |
| Difficult access to food                     | No, never, rarely  | Ref                |                          |                           |
|                                              | Yes, always, often | 0.83 (0.62 – 1.12) | 0.200                    |                           |
| Smoking status                               | Non smoker         | Ref                |                          | ref                       |
|                                              | Smoker             | 0.39 (0.28 – 0.53) | <b>&lt;0.001</b>         | <b>0.46 (0.32 – 0.65)</b> |
| Psychiatric or addictive comorbidity         | No                 | Ref                |                          | ref                       |
|                                              | Yes                | 0.46 (0.30 – 0.69) | <b>&lt;0.001</b>         | <b>0.52 (0.32 – 0.85)</b> |

\$. total of participants in the analysis: 1241; missing values exist for some of the independent variables; for example smoking status (n=116), educational attainment (n=114), health insurance (n=70), self-reported financial resources (n=63) or household status (n=41).

\*: Percentage was calculated on the basis of each participant's exposed time until the event or until the end of the follow-up in the absence of an event.

£: We fitted a multivariable model containing all variables that were significant in a univariate analysis at the 10% level. We used the Stepwise selection function in R (a mix between forward and backward selection), which starts with an empty model and adds predictors according to AIC criteria. Accordingly, "Country of birth" and "physical distancing" were considered in the multivariate model and removed. In addition, "number of contacts" was forced into the model as a relevant variable.

### Symptomatology of participants with positive SARS-CoV-2 serological status

Among participants with SARS-CoV-2 infection (positive IgM or IgG or both, n=180), 67.6% reported no symptoms (Table 3). Among participants with symptomatic SARS-CoV-2 infections, the most common symptoms were fever, cough, headache and fatigue. Even if participants with a positive serological status reported Covid-19 syndrome (fever, cough, anosmia, headache notably) significantly more often than participants without serological immunity (Table 3), the frequency of symptoms reported did not appear to be strictly specific to SARS-CoV-2 infection.

**Table 3: Symptoms according to serological status (n=1241)**

|                                          | Negative serological status n (%) | CI95% <sup>s</sup> | Positive serological status n (%) | CI95% <sup>s</sup> | P-value |
|------------------------------------------|-----------------------------------|--------------------|-----------------------------------|--------------------|---------|
| Individuals missing symptom data (n=303) | 302 (24.3%)                       |                    | 1 (0.1%)                          |                    |         |
| Individuals with symptom data            | 759 (75.7%)                       |                    | 179 (99.9%)                       |                    |         |

| (n=938) |                            |             |               |             |               |        |
|---------|----------------------------|-------------|---------------|-------------|---------------|--------|
|         | Asymptomatic patient       | 656 (86.4%) | (84.7 – 91.4) | 121 (67.6%) | (65.8 – 71.5) | <0.001 |
|         | Participants with symptoms | 103 (13.6%) | (11.7 – 14.3) | 58 (32.4%)  | (30.6 – 34.1) |        |
|         | Fever                      | 42 (4.0%)   | (2.1 – 4.1)   | 36 (18.0%)  | (16.1 – 18.9) | <0.001 |
|         | Cough                      | 38 (3.7%)   | (1.8 – 3.8)   | 28 (14.0%)  | (12.1 – 14.6) | <0.001 |
|         | Dyspnea                    | 16 (1.5%)   | (0.0 – 1.5)   | 8 (4.0%)    | (2.1 – 4.1)   | 0.040  |
|         | Headache                   | 41 (3.9%)   | (2.0 – 4.0)   | 36 (18.0%)  | (16.2 – 18.9) | <0.001 |
|         | Anosmia                    | 15 (1.4%)   | (0.0 – 1.4)   | 21 (10.5%)  | (8.6 – 10.9)  | <0.001 |
|         | Rhinitis                   | 39 (3.7%)   | (1.8 – 3.8)   | 21 (10.5%)  | (8.6 – 10.9)  | <0.001 |
|         | Fatigue                    | 35 (3.4%)   | (1.5 – 3.5)   | 38 (19.0%)  | (17.1 – 20.0) | <0.001 |
|         | Diarrhoea                  | 15 (1.4%)   | (0.0 – 1.4)   | 15 (7.5%)   | (5.6 – 7.8)   | <0.001 |
|         | Joint pain                 | 15 (1.4%)   | (0.0 – 1.4)   | 19 (9.5%)   | (7.6 – 10.0)  | <0.001 |
|         | Odynophagia                | 22 (2.1%)   | (0.0 – 2.1)   | 14 (7.0%)   | (5.1 – 7.3)   | <0.001 |
|         | Chills                     | 21 (2.0%)   | (0.0 – 2.0)   | 17 (8.5%)   | (6.6 – 8.8)   | <0.001 |
|         | Mottling                   | 1 (0.1%)    | (0.0 – 0.1)   | 0 (0%)      | (0.0 – 0.1)   | 0.999  |
|         | Skin rash                  | 1 (0.1%)    | (0.0 – 0.1)   | 3 (1.5%)    | (0.0 – 1.5)   | 0.014  |
|         | Conjunctivitis             | 9 (0.8%)    | (0.0 – 0.7)   | 8 (4.0%)    | (2.1 – 4.1)   | 0.002  |
|         | Other                      | 5 (0.5%)    | (0.0 – 0.4)   | 2 (1.0%)    | (0.0 – 0.9)   | 0.316  |

CI95%: confidence interval at 95%

\$: an exact test of a simple null hypothesis about the probability of success in a Bernoulli experiment was performed, with confidence level for the returned confidence interval.

## DISCUSSION

The present study is the first to describe the dynamics of SARS-CoV-2 seroprevalence among a large cohort of 1241 homeless people living in Marseille, France. Analysis of data from homeless participants with positive serology results over time, revealed a high prevalence of asymptomatic infection and significant associations between positive serology and the lack of financial resources, being an isolated parent, having between 5 and 15 daily contacts, and the time spent in emergency shelters. Repeated seroprevalence studies enabled to estimate the cumulative incidence of SARS-CoV-2 infection in both asymptomatic and symptomatic people, offering valuable data to inform public health policy-makers [7,20]. In the general population, asymptomatic individuals represent up to 68% of SARS-CoV-2 infections [7,21] and contribute to the rapid spread of the disease [1]. In our study, the estimated prevalence of SARS-CoV-2 increased from 6.01% [4.68-7.34] in June to August to 18.86% [16.00-21.72] in September to December and remained higher than in the general population. Indeed, a cross-sectional study evaluating the seroprevalence of SARS-CoV-2 antibodies across the general population in Marseille in May and November, 2020, found 3.0% [1.9-4.2] and 6.5% (CI95% 4.5 – 8.7), respectively. The increasing gap in seroprevalence between the general population and the homeless population may be due to a potential breakdown of protective measures for people in the most precarious situations [5]. The available data on homeless people comes from cross-sectional studies, that mainly found high seroprevalence [7,9,10]. However, the testing approach was different and concerned a population selected from one type of accommodation (mainly emergency shelters) and results also depend on the intensity of the local epidemic at the time of the survey. A lower infection rate with increasing age was reported in several population-based serological studies, which is not consistent with our findings [22,23]. We observed no differences, in univariate analysis, in estimated seropositivity for older participants or for participants who had comorbidities. These results suggest that aged homeless people at risk of severe COVID-19 disease may be infected by SARS CoV-2 at the same rate as other adults. The pandemic has played an important role in amplifying health inequalities that already existed [24,25]. Increasing evidence has emerged, highlighting that COVID-19 mortality is higher for those who are socioeconomically deprived. We reported in our findings, in addition to the poorest condition of homelessness, that not having financial resources during the pandemic crisis was also a risk factor of SARS-CoV-2 seroprevalence. The link between socioeconomic status and development of infectious disease is well documented, and the main mechanisms reported to be associated with higher occurrence rates of communicable diseases included poor housing, lack of education, nutritional deficiencies, poor work conditions and hygiene [26].

African homeless immigrants had higher SARS-CoV-2 prevalence rates in our study compared to other nationalities. These findings were consistent with French, English or US studies which reported higher seroprevalence rates and mortality in black ethnic groups [8,27,28]. The homeless are a heterogeneous population. Even if homeless people already face disparity in health outcomes in the current COVID-19 pandemic, African immigrants are a subgroup at even more risk. Thus, it could be important to generate accessible health information and preventive measures for this subgroup, adapted to their literacy and specific needs.

Our study reported lower SARS-CoV-2 infection rates in participants with mental disorders or substance abuse. This is surprising since substance use disorders have frequently been reported to increase the risk of infectious diseases and mental illness to impact awareness of vulnerability to infection and help-seeking when symptoms of COVID-19 develop [29,30]. Since social contacts are the way in which the infection is spread, this lower seroprevalence could be interpreted as a sign of exclusion of these particularly stigmatized people [31]. It should also be noted that in Marseille there are specific healthcare mobile teams for people suffering from mental disorders and substance abuse [32]. This type of specific program has previously reported positive results in pandemic context [33].

In line with the findings of other studies, we observed a considerable proportion of positive subjects (67.6%) with asymptomatic infection [21,34,35]. Some symptoms (fever, cough, headache or fatigue notably) were significantly associated with positive SARS-CoV-2 serology and should be repeated to people during interventions on prevention and information.

As previously described, smoking prevalence was lower in seropositive SARS-CoV-2 participants in our study [36]. Even if prevalence was lower, smoking was associated with an increased risk of hospitalization and morbidity [37]. In our study, a substantial proportion of participants reported alcohol and tobacco consumption. In homeless populations a large proportion of deaths are therefore substance-attributable [38].

Our study reinforces the negative role of overcrowded types of accommodation for homeless people, which increase SARS-CoV-2 transmission. In the USA and France, emergency shelters and their high population density appear to increase the risk of infection [7,10]. Shelters should be considered as high-risk environments and stays there should be limited to the minimum. Providing adequate housing with individual bathroom facilities could be the most effective strategy for mitigating SARS-CoV-2 transmission in homeless communities, as was reported in a modeling study and by field healthcare workers [39,40]. Our findings also show an association with a high prevalence in shelters and hostels, which highlights the limits of individual preventive measures in transitional collective accommodations. These studies illustrate a good compliance with preventive measures, notably in collective accommodations, but these are clearly insufficient to limit the spread of infection. Homeless people in the pandemic must face concurrent risks: the risk of SARS-CoV-2 infection in shelters and collective accommodation, and the risk of the lack of access to food, water or hygiene products in more insecure housing conditions [41].

Throughout the course of the pandemic, healthcare and housing programs for homeless people have been modified. However, our results suggest that overcrowded and large emergency shelters or transitional accommodation including hostels increase the risk of SARS-CoV-2 transmission which pleads to adapt social and public health infrastructures towards good quality, smaller and semi-private accommodation. Holistic action (food, hygiene and financial support, health insurance, specific vaccination program...) must also be taken to ensure that the needs of these individuals are met sufficiently for them to be able to limit viral spread, survive this pandemic and be well enough equipped to endure the following economic crisis.

In addition, our findings highlight two other risk factors linked to socioeconomic inequalities: the lack of financial resource and being an isolated parent. Furthermore, people with low financial resources or single parents with one child are potentially more likely to seek outside support which may increase the risk of viral exposure, as it was previously described for people who have to work outside [42].

### Strengths and limitations

Our study has number of strengths. Although studies have shown an increased risk of SARS-CoV-2 infection in homeless people, this is the first surveillance data from a cohort providing an incidence rate of seroconversion and comparing seroprevalence with the general population at two different time points. Our study described risk factors of SARS-CoV-2 infection in a large study population with high-quality and statistically robust methodology. Our findings quantify the excess risk associated with staying in emergency shelters. We also found evidence of SARS-CoV-2 infection among the most economically vulnerable (lack of financial resources, isolated parent) highlighting the need for a comprehensive and proactive approach including financial aid, food, water, adequate housing, mobile healthcare and social assistance for this vulnerable population.

Our study has also some limitations. Although it is representative of different homelessness categories (living in the street, slum, squat, emergency shelter or transitional accommodation), the sample was not randomly enrolled and therefore our findings may not reflect true seroprevalence, as a potential selection bias cannot be excluded. Characteristics of study participants upon inclusion and at the end of follow-up were also different, roofless and younger populations were most frequently lost to follow-up because of a higher mobility. We may also underestimate seroprevalence and false negative results cannot be excluded [43,44]. Finally, the serological tests between the general population and the homeless population were not exactly the same. This may account for some of the observed differences in seroprevalence rates between the two populations.

### Policy implications and further research

There is growing evidence that, in addition to usual preventive measures, public policies should pay attention to adapt the type of accommodation and overall approach of precariousness. The findings of this study can guide European and other governments' disease control planning; to find optimal solutions to house people in less crowded accommodations, prioritizing individual rather than collective settings and a global approach, thus restricting transmission. To complete these results, future studies in this vulnerable population should assess the morbidity and mortality associated with SARS-CoV-2.

## CONCLUSIONS

The longitudinal cohort of homeless people in Marseille revealed an increase in the seroprevalence of SARS-CoV-2 infection. This was higher than that observed in the general population and reflects precarious living conditions and inadequate types of accommodation for this vulnerable population.

### Data availability statement

The datasets generated and analyzed during the current study are not publicly available due to special authorization to transfer databases given by the CNIL. Upon prior authorization by the CNIL, the dataset would be available from the corresponding author upon reasonable request. Additionally, the study protocol is available upon request. All data requests should be addressed to the corresponding author.

### Ethics statements

*Patient consent for publication*

Not applicable

*Ethical Approval*

All participants provided a written informed consent. The COVIDHomeless study was designed and carried out in compliance with the Declaration of Helsinki and with legal and regulatory provisions. It was approved by the French ethics committee of Ile-de-France VI on May 28, 2020 (CPP IDF VI - number 44-20; ID: 2020-AO1398-31). The database was anonymized and declared to the French data protection commission (*Commission Nationale de l'Informatique et des Libertés*, CNIL, n°2018172v0).

### Acknowledgments

We would like to thank all the homeless people who participate in this study by providing their samples and questionnaires. We would also like to thank all the following: the **nurse interweaves and mediators involved in the 'COVID homeless' project**: Maud Landreau, Anne Ranise and Nathalie Vuagniaux, Grâce Inegbeze, Snjezana Huette, Marko Sava, Lisa Hasse, Mathieu Ledu, Alejandro Vernet and Drisse Mekkaoui; the **Assab network; the following Homeless outreach teams**: ADDAP13, AMPIL, ASUD, Bus 31/32, Equipe Mobile d'Aide (EMA) Saralogisol, Equipe Mobile santé ADJ Marceau, Equipe Mobile Gare et Connexion ADJ Marceau, MARSS-APHM, Nouvelle Aube, Mission Bidonville Médecins du monde, PASS adulte APHM, Réseau Santé Marseille Sud (RSMS); the following **Emergency shelters**: UHU La Madrague-ville, St Louis, Sleep'in (groupe SOS Solidarité), Forbin (Fondation St Jean de Dieu), Marius Macias (AAJT) and the following people involved in providing **Collective accommodation for homeless people**: Marius Macias (AAJT); William Booth (Armée du Salut); Le Marabout, le Mascaret (Habitat Alternatif Social); Foyer Honorat (Hospitalité pour les Femmes); Jane Pannier (Maison de la Jeune Fille); SHAS (Saralogisol) Coco Velten, La Selonne (groupe SOS Solidarité); Forbin (St Jean de Dieu); Village Club du Soleil; for their work in improving the care management of homeless people in Marseille.

**Contributors**: First draft of the manuscript: EmM, SL, EIM, AT. Contributed to writing the manuscript: EmM, SL, EIM, AA, JL, LN, TB, MM, SNW, JW and AT. EM, TB and MM collected the data and samples. EmM, LN, MM performed biological analysis. Data analysis: EmM, SL, AA, AT. Study design: EmM, SL, TB, AT. All authors contributed to subsequent drafts and have reviewed and agreed with the content of the final manuscript.

**Funding**: This work was supported by the French Directorate of Health care facilities (DGOS) – research grant PHRC COVID-19 (COVID-homeless-0047)

**Competing Interests**: The authors declare that they have no competing interests.

## REFERENCES

1 Baggett TP, Gaeta JM. COVID-19 and homelessness: when crises intersect. *Lancet Public Health*

Published Online First: 6 February 2021. doi:10.1016/S2468-2667(21)00022-0

2 Hwang SW, Burns T. Health interventions for people who are homeless. *Lancet* 2014;**384**:1541–7. doi:10.1016/S0140-6736(14)61133-8

3 DIHL. Hébergement d'urgence les hôtels mobilisés pour l'hébergement des personnes sans-abri. gouvernement.fr. 2020. <https://www.gouvernement.fr/hebergement-d-urgence-les-hotels-mobilises-pour-l-hebergement-des-personnes-sans-abri>

4 FAP. 26e rapport sur l'état du mal-logement en France 2021. Fondation Abbé Pierre. 2021. <https://www.fondation-abbe-pierre.fr/actualites/26e-rapport-sur-letat-du-mal-logement-en-france-2021> (accessed 3 Mar 2021).

5 ALERTE PACA. Ultra-précarité en région PACA, l'avertissement du collectif ALERTE PACA. Uriopss Paca et Corse. 2020. <https://www.uriopss-pacac.fr/actualites/ultra-precarite-en-region-paca-lavertissement-du-collectif-alerte-paca> (accessed 30 Nov 2020).

6 Karb R, Samuels E, Vanjani R, *et al.* Homeless Shelter Characteristics and Prevalence of SARS-CoV-2. *West J Emerg Med* 2020;**21**:1048–53. doi:10.5811/westjem.2020.7.48725

7 Roederer T, Mollo B, Vincent C, *et al.* Seroprevalence and risk factors of exposure to COVID-19 in homeless people in Paris, France: a cross-sectional study. *Lancet Public Health* Published Online First: 5 February 2021. doi:10.1016/S2468-2667(21)00001-3

8 Warszawski J, Bajos N, Meyer L, *et al.* En mai 2020, 4, 5% de la population en France métropolitaine a développé des anticorps contre le SARS-CoV-2. Premiers résultats de l'enquête nationale EpiCov. 2020.

9 Baggett TP, Keyes H, Sporn N, *et al.* Prevalence of SARS-CoV-2 Infection in Residents of a Large Homeless Shelter in Boston. *JAMA* Published Online First: 27 April 2020. doi:10.1001/jama.2020.6887

10 Mosites E, Parker EM, Clarke KEN, *et al.* Assessment of SARS-CoV-2 Infection Prevalence in Homeless Shelters - Four U.S. Cities, March 27-April 15, 2020. *MMWR Morb Mortal Wkly Rep* 2020;**69**:521–2. doi:10.15585/mmwr.mm6917e1

11 Doran KM, Ragins KT, Iacomacci AL, *et al.* The revolving hospital door: hospital readmissions among patients who are homeless. *Med Care* 2013;**51**:767–73. doi:10.1097/MLR.0b013e31829fafbb

12 Russolillo A, Moniruzzaman A, Parpouchi M, *et al.* A 10-year retrospective analysis of hospital admissions and length of stay among a cohort of homeless adults in Vancouver, Canada. *BMC Health Serv Res* 2016;**16**:60. doi:10.1186/s12913-016-1316-7

13 Al-Shakarchi NJ, Evans H, Luchenski SA, *et al.* Cardiovascular disease in homeless versus housed individuals: a systematic review of observational and interventional studies. *Heart* 2020;**106**:1483–8. doi:10.1136/heartjnl-2020-316706

14 Loubière S, Monfardini E, Allaria C, *et al.* Seroprevalence of SARS-CoV-2 Antibodies Among Homeless People Living Rough, in Shelters and Squats: A Large Population-Based Study in France. 2021.

15 Brunner A, Maurin L. Rapport sur la pauvreté en France, édition 2020-2021. *Observatoire des inégalités* 2020;:104.

16 ETHOS Typology on Homelessness and Housing Exclusion.

<https://www.feantsa.org/en/toolkit/2005/04/01/ethos-typology-on-homelessness-and-housing-exclusion> (accessed 15 Mar 2021).

17 Vauloup-Fellous C, Maylin S, Périllaud-Dubois C, *et al.* Performance of 30 commercial SARS-CoV-2 serology assays in testing symptomatic COVID-19 patients. *Eur J Clin Microbiol Infect Dis* 2021;:1–7. doi:10.1007/s10096-021-04232-3

18 Warszawski J, Bajos N, Barlet M, *et al.* A national mixed-mode seroprevalence random population-based cohort on SARS-CoV-2 epidemic in France: the socio-epidemiological EpiCov study. *Public and Global Health* 2021. doi:10.1101/2021.02.24.21252316

19 SPF. Taux d'incidence de l'épidémie de COVID-19 (SI-DEP) - data.gouv.fr. 2021. <https://data.gouv.fr/fr/datasets/taux-d-incidence-de-lepidemie-de-covid-19/> (accessed 5 Mar 2021).

20 Murhekar MV, Bhatnagar T, Selvaraju S, *et al.* SARS-CoV-2 antibody seroprevalence in India, August–September, 2020: findings from the second nationwide household serosurvey. *Lancet Glob Health* 2021;**9**:e257–66. doi:10.1016/S2214-109X(20)30544-1

21 Ralli M, Morrone A, Arcangeli A, *et al.* Asymptomatic patients as a source of transmission of COVID-19 in homeless shelters. *Int J Infect Dis* 2021;**103**:243–5. doi:10.1016/j.ijid.2020.12.031

22 Carrat F, Touvier M, Severi G, *et al.* Incidence and risk factors of COVID-19-like symptoms in the French general population during the lockdown period: a multi-cohort study. *BMC Infect Dis* 2021;**21**. doi:10.1186/s12879-021-05864-8

23 Stringhini S, Wisniak A, Piumatti G, *et al.* Seroprevalence of anti-SARS-CoV-2 IgG antibodies in Geneva, Switzerland (SEROCoV-POP): a population-based study. *The Lancet* 2020;**396**:313–9. doi:10.1016/S0140-6736(20)31304-0

24 Dorn A van, Cooney RE, Sabin ML. COVID-19 exacerbating inequalities in the US. *Lancet* 2020;**395**:1243–4. doi:10.1016/S0140-6736(20)30893-X

- 1  
2  
3 25 Bambra C, Riordan R, Ford J, *et al.* The COVID-19 pandemic and health inequalities. *J Epidemiol Community Health* 2020;**74**:964–8. doi:10.1136/jech-2020-214401
- 4 26 Sommer I, Griebler U, Mahlknecht P, *et al.* Socioeconomic inequalities in non-communicable diseases  
5 and their risk factors: an overview of systematic reviews. *BMC Public Health* 2015;**15**:914. doi:10.1186/s12889-  
6 015-2227-y
- 7 27 Anand S, Montez-Rath M, Han J, *et al.* Prevalence of SARS-CoV-2 antibodies in a large nationwide  
8 sample of patients on dialysis in the USA: a cross-sectional study. *Lancet* Published Online First: 25 September  
9 2020. doi:10.1016/S0140-6736(20)32009-2
- 10 28 Aldridge RW, Lewer D, Katikireddi SV, *et al.* Black, Asian and Minority Ethnic groups in England are  
11 at increased risk of death from COVID-19: indirect standardisation of NHS mortality data. *Wellcome Open Res*  
12 2020;**5**:88. doi:10.12688/wellcomeopenres.15922.2
- 13 29 Serota DP, Barocas JA, Springer SA. Infectious Complications of Addiction: A Call for a New  
14 Subspecialty Within Infectious Diseases. *Clin Infect Dis* 2020;**70**:968–72. doi:10.1093/cid/ciz804
- 15 30 Neto MLR, de Souza RI, Quezado RMM, *et al.* When basic supplies are missing, what to do? Specific  
16 demands of the local street population in times of coronavirus - a concern of social psychiatry. *Psychiatry Res*  
17 2020;**288**:112939. doi:10.1016/j.psychres.2020.112939
- 18 31 Mejia-Lancheros C, Lachaud J, O'Campo P, *et al.* Trajectories and mental health-related predictors of  
19 perceived discrimination and stigma among homeless adults with mental illness. *PLoS One* 2020;**15**:e0229385.  
20 doi:10.1371/journal.pone.0229385
- 21 32 Tinland A, Loubière S, Boucekine M, *et al.* Effectiveness of a housing support team intervention with a  
22 recovery-oriented approach on hospital and emergency department use by homeless people with severe mental  
23 illness: a randomised controlled trial. *Epidemiol Psychiatr Sci* 2020;**29**. doi:10.1017/S2045796020000785
- 24 33 Martin C, Andrés P, Bullón A, *et al.* COVID pandemic as an opportunity for improving mental health  
25 treatments of the homeless people. *Int J Soc Psychiatry* Published Online First: 21 August 2020.  
26 doi:10.1177/0020764020950770
- 27 34 Milazzo L, Lai A, Pezzati L, *et al.* Dynamics of the seroprevalence of SARS-CoV-2 antibodies among  
28 healthcare workers at a COVID-19 referral hospital in Milan, Italy. *Occup Environ Med* Published Online First:  
29 February 2021. doi:10.1136/oemed-2020-107060
- 30 35 Rivett L, Sridhar S, Sparkes D, *et al.* Screening of healthcare workers for SARS-CoV-2 highlights the  
31 role of asymptomatic carriage in COVID-19 transmission. *Elife* 2020;**9**. doi:10.7554/eLife.58728
- 32 36 Guan W, Ni Z, Hu Y, *et al.* Clinical Characteristics of Coronavirus Disease 2019 in China. *N Engl J*  
33 *Med* Published Online First: 28 February 2020. doi:10.1056/NEJMoa2002032
- 34 37 Cattaruzza MS, Zagà V, Gallus S, *et al.* Tobacco smoking and COVID-19 pandemic: old and new  
35 issues. A summary of the evidence from the scientific literature. *Acta Biomed* 2020;**91**:106–12.  
36 doi:10.23750/abm.v91i2.9698
- 37 38 Baggett TP, Chang Y, Singer DE, *et al.* Tobacco-, alcohol-, and drug-attributable deaths and their  
38 contribution to mortality disparities in a cohort of homeless adults in Boston. *Am J Public Health*  
39 2015;**105**:1189–97. doi:10.2105/AJPH.2014.302248
- 40 39 Baggett TP, Scott JA, Le MH, *et al.* Clinical Outcomes, Costs, and Cost-effectiveness of Strategies for  
41 Adults Experiencing Sheltered Homelessness During the COVID-19 Pandemic. *JAMA Netw Open*  
42 2020;**3**:e2028195. doi:10.1001/jamanetworkopen.2020.28195
- 43 40 MIM. 120 sans-abri relogés dans le Village Club du Soleil à la Belle de Mai. *Made in Marseille*  
44 Published Online First: 2020. [https://madeinmarseille.net/67072-120-personnes-sans-abri-relogees-dans-le-  
45 village-club-du-soleil-a-la-belle-de-mai/](https://madeinmarseille.net/67072-120-personnes-sans-abri-relogees-dans-le-village-club-du-soleil-a-la-belle-de-mai/)
- 46 41 “Locked down outside”: Perception of hazard and health resources in COVID-19 epidemic context  
47 among homeless people. <https://www.ncbi.nlm.nih.gov/pmc/articles/PMC8160278/> (accessed 31 May 2021).
- 48 42 Bajos N, Franck J-E, Counil E, *et al.* Social Inequalities and Dynamics of the COVID-19 Epidemic:  
49 Evidence from France. *EPICOV Study, Social Inequalities and Dynamics of the COVID-19 Epidemic: Evidence  
50 from France* 2021.
- 51 43 Jin Y, Wang M, Zuo Z, *et al.* Diagnostic value and dynamic variance of serum antibody in coronavirus  
52 disease 2019. *Int J Infect Dis* 2020;**94**:49–52. doi:10.1016/j.ijid.2020.03.065
- 53 44 Brandstetter S, Roth S, Harner S, *et al.* Symptoms and immunoglobulin development in hospital staff  
54 exposed to a SARS-CoV-2 outbreak. *Pediatr Allergy Immunol* 2020;**31**:841–7. doi:10.1111/pai.13278

## Figure legend

**Figure 1: SARS-CoV-2 epidemics in Marseille, with data provided by the French national monitoring platform (SI-DEP) from Santé Publique France [19]**

In gray the two campaigns with serological testing and questionnaires.

1  
2  
3 **Figure 2: Seroprevalence rates during the two serological testing campaigns<sup>s</sup> in homeless people cohorts**  
4 **and results for the general population from the EpiCov study in Marseille**

5 \*General population seroprevalence rate data come from the EpiCov study in Marseille. \$: Bootstrap resampling  
6 approach with a set of 1,000 samples was used to create confidence intervals, accounting for variability in the  
7 sensitivity and specificity of the serological assay.

8  
9 **Figure 3: Risk of SARS-CoV-2 infection by type of housing for homeless participants estimated by the**  
10 **Kaplan-Meier method, including 95% CI. Censoring and number of participants at risk at different time**  
11 **points are indicated.**

12 Street: people living rough (ETHOS1); Emerg.Shelt.: people living in emergency shelters (ETHOS2); Hostel:  
13 people living in hostels (ETHOS3); Slums: people living in slums or squats (ETHOS8); Trans.Shelt.: people  
14 living in transitional accommodation for the homeless (ETHOS4)

15  
16 **Figure 4: Cox multivariable logistic regression analysis of risk factors of SARS-CoV-2 seroprevalence in**  
17 **homeless people in Marseille**

18 Having\_Comorb\_PsyAddic: Psychiatric or addictive comorbidities  
19  
20  
21  
22  
23  
24  
25  
26  
27  
28  
29  
30  
31  
32  
33  
34  
35  
36  
37  
38  
39  
40  
41  
42  
43  
44  
45  
46  
47  
48  
49  
50  
51  
52  
53  
54  
55  
56  
57  
58  
59  
60



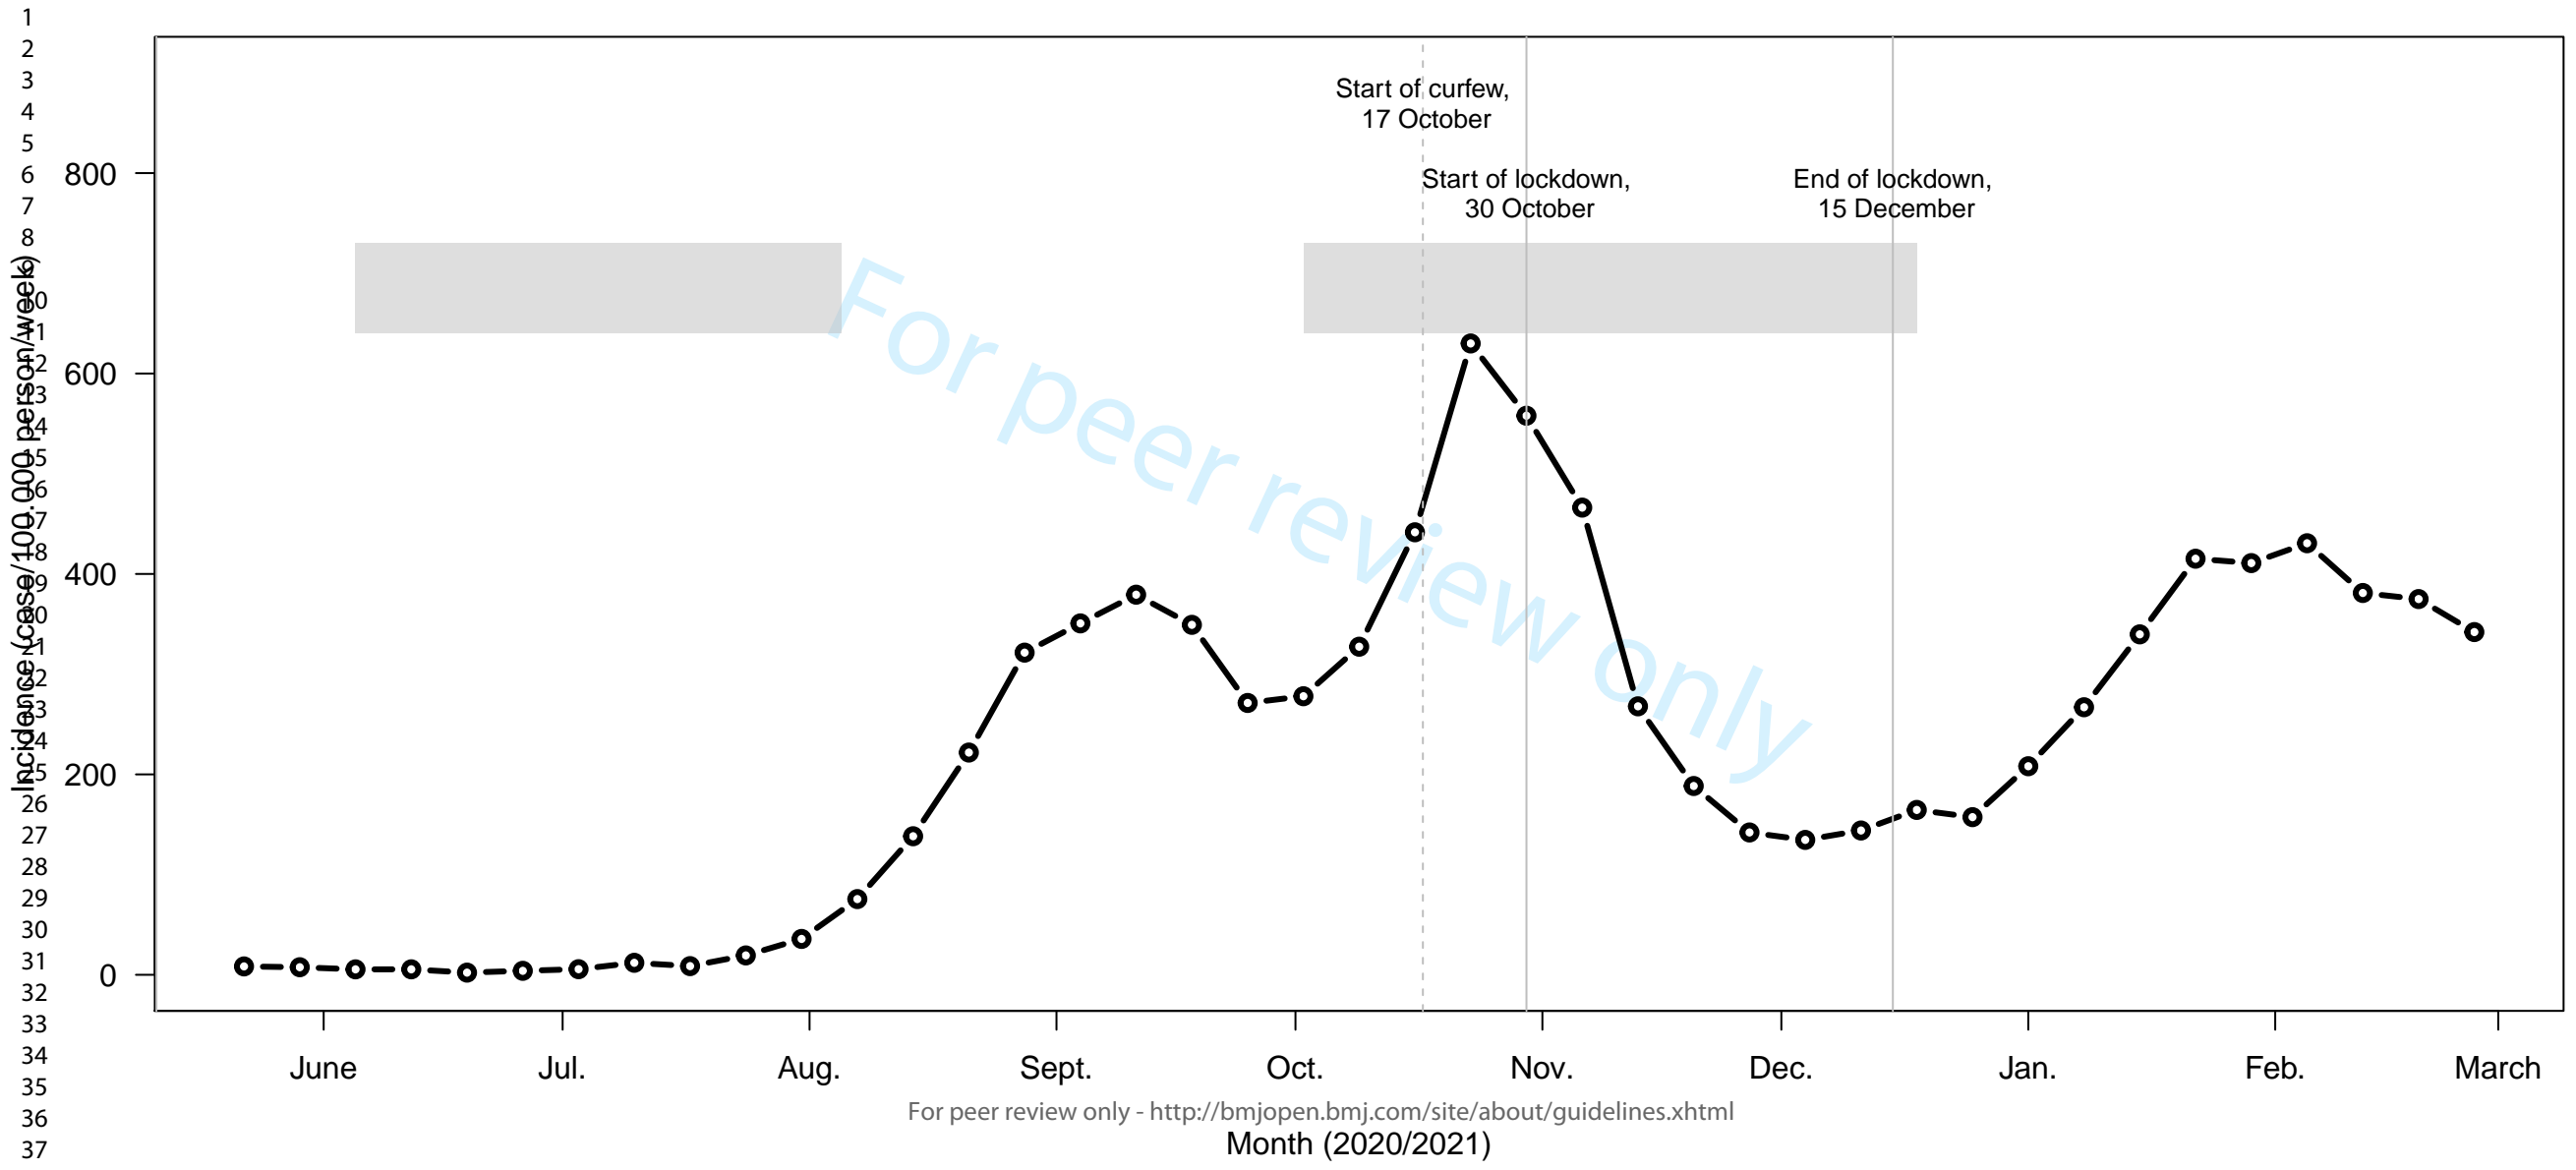

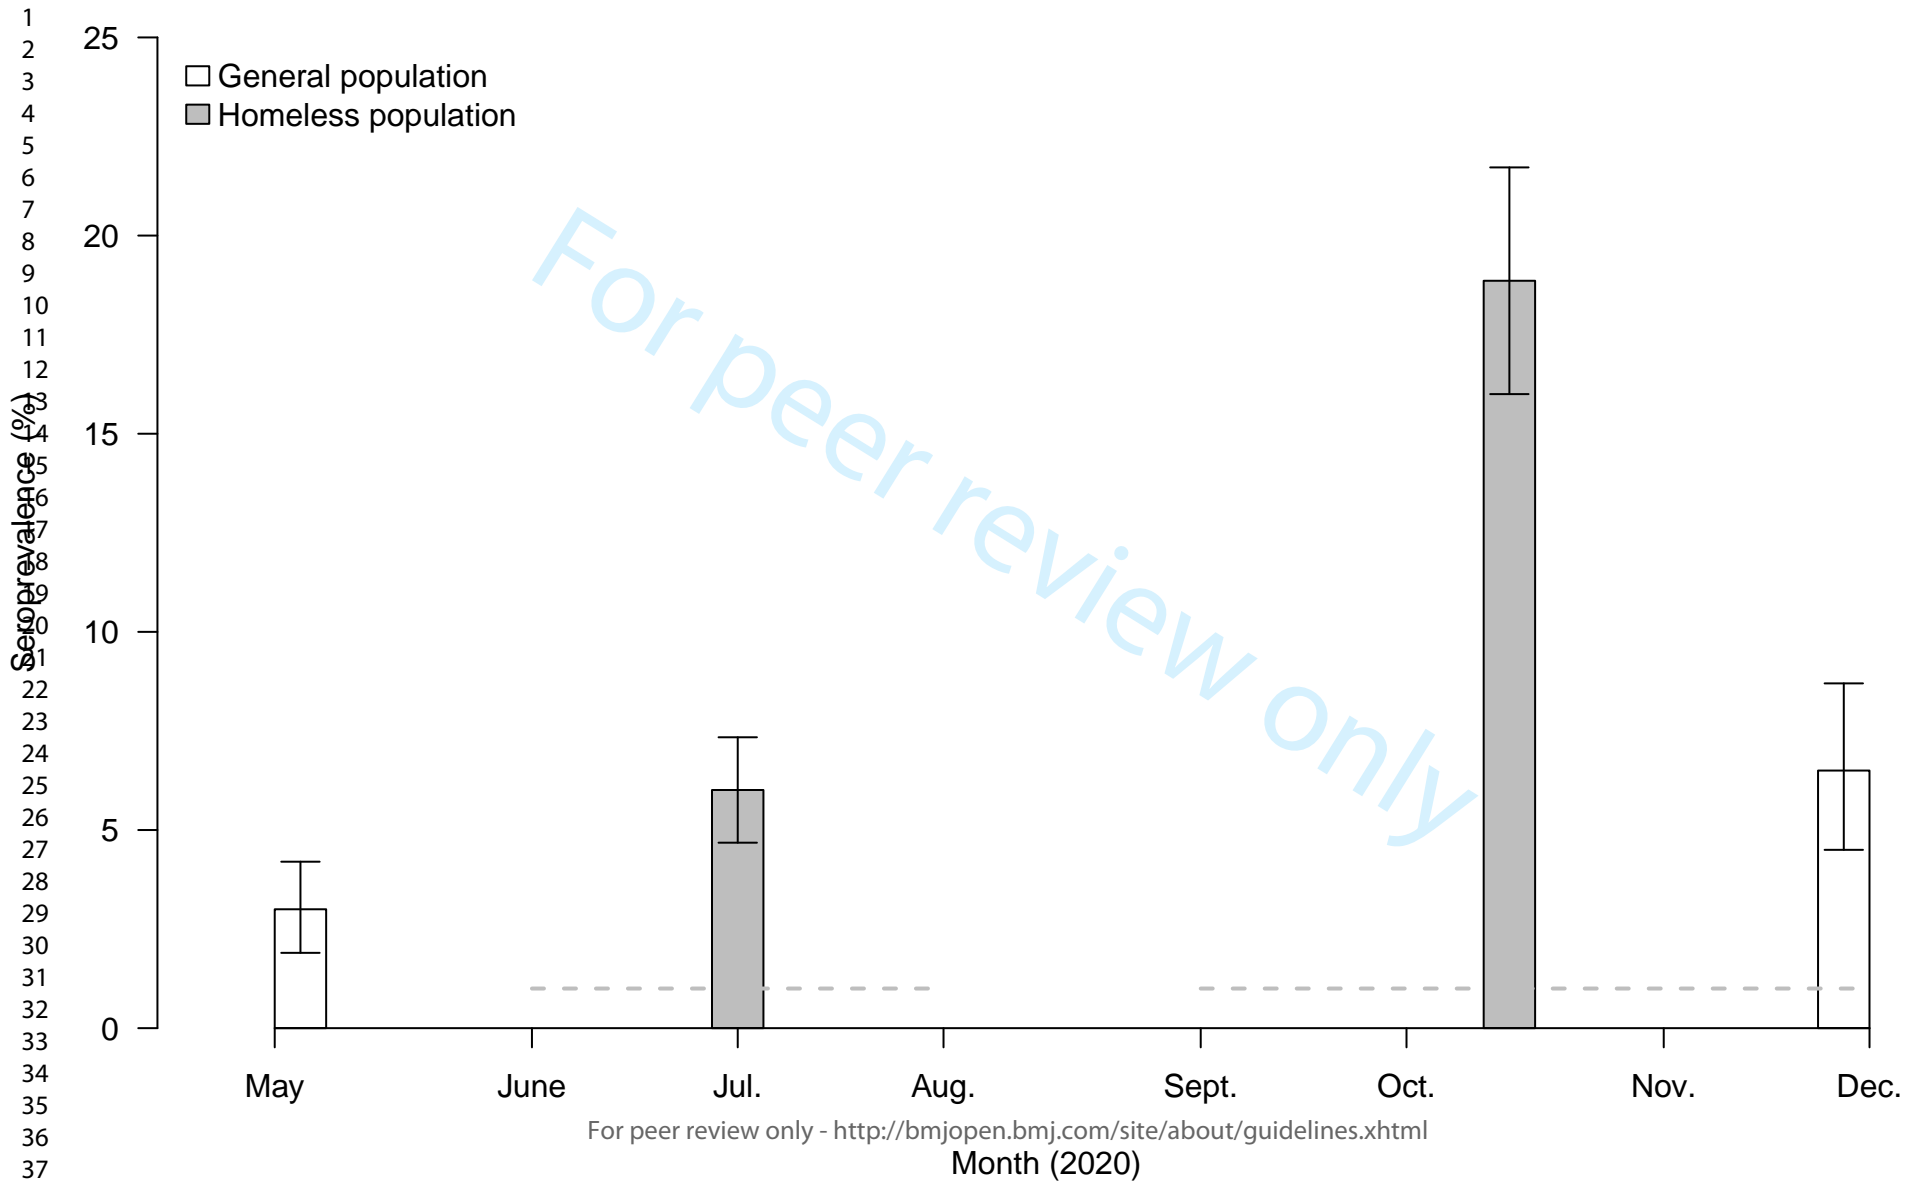

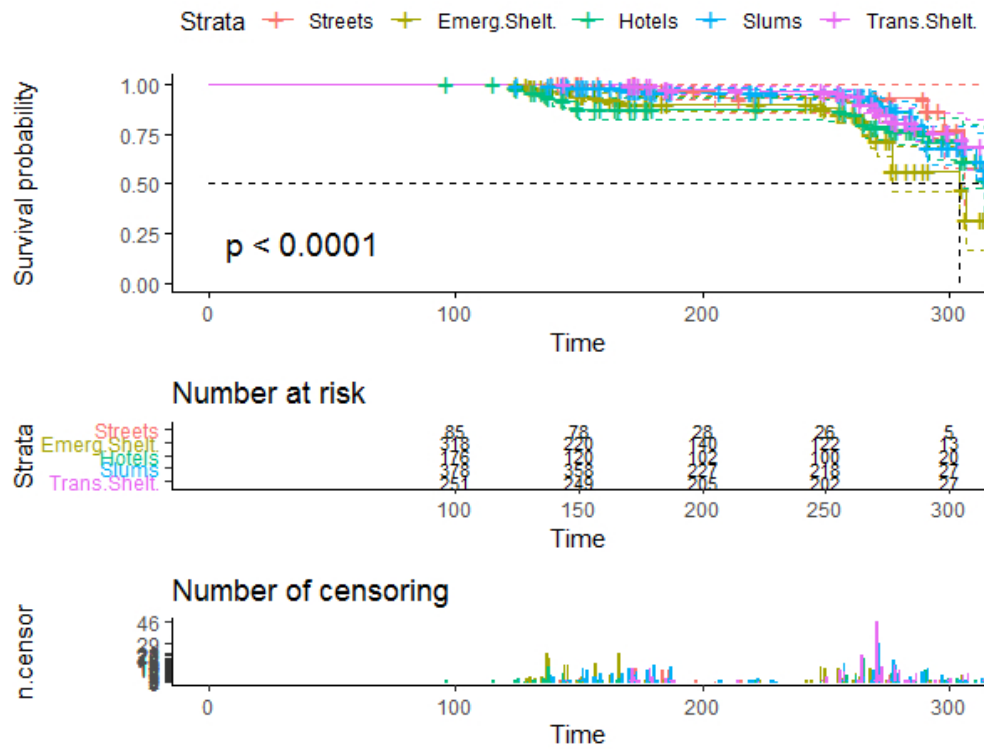

Risk of SARS-CoV-2 infection by type of housing for homeless participants estimated by the Kaplan-Meier method, including 95% CI. Censoring and number of participants at risk at different time points are indicated.

Street: people living rough (ETHOS1); Emerg.Shelt.: people living in emergency shelters (ETHOS2); Hostel: people living in hostels (ETHOS3); Slums: people living in slums or squats (ETHOS8); Trans.Shelt.: people living in transitional accommodation for the homeless (ETHOS4)

157x124mm (96 x 96 DPI)

| Variable                           |                  | N   | Hazard ratio |                   | p      |
|------------------------------------|------------------|-----|--------------|-------------------|--------|
| Household_status                   | Isolated adults  | 589 | ■            | Reference         |        |
|                                    | Isolated parent  | 121 | ■            | 1.64 (1.07, 2.52) | 0.024  |
|                                    | Family           | 338 | ■            | 0.78 (0.50, 1.20) | 0.255  |
| Percent_time_shelter               | <=33             | 764 | ■            | Reference         |        |
|                                    | 33 to 66         | 139 | ■            | 1.70 (1.11, 2.62) | 0.016  |
|                                    | >=66             | 145 | ■            | 1.93 (1.18, 3.15) | 0.009  |
| Difficulty_access_hygiene_products | No,never,rarely  | 685 | ■            | Reference         |        |
|                                    | Yes,always,often | 363 | ■            | 0.75 (0.50, 1.12) | 0.160  |
| Having_FinancialResources          | No               | 459 | ■            | Reference         |        |
|                                    | Yes              | 589 | ■            | 0.70 (0.51, 0.97) | 0.033  |
| Tobacco                            | Non smoker       | 452 | ■            | Reference         |        |
|                                    | Smoker           | 596 | ■            | 0.46 (0.32, 0.65) | <0.001 |
| Having_Comorb_PsyAddic             | No               | 784 | ■            | Reference         |        |
|                                    | Yes              | 264 | ■            | 0.52 (0.32, 0.85) | 0.009  |
| Number_Daily_contact               | <=5              | 634 | ■            | Reference         |        |
|                                    | 5-15             | 319 | ■            | 1.84 (1.27, 2.67) | 0.001  |
|                                    | >15              | 95  | ■            | 1.45 (0.69, 3.04) | 0.331  |

Cox multivariable logistic regression analysis of risk factors of SARS-CoV-2 seroprevalence in homeless people in Marseille

Having\_Comorb\_PsyAddic: Psychiatric or addictive comorbidities

274x147mm (96 x 96 DPI)

**Supplementary Table 1: Representativeness of the sample**

| Type of accommodation                               | Estimation of the target population* | Source                                              | Number of effectively enrolled people |
|-----------------------------------------------------|--------------------------------------|-----------------------------------------------------|---------------------------------------|
| Squats or slums (Ethos 8)                           | 619 to 817                           | NGO (MDM - Doctors of the World) – April 2020       | 363                                   |
| Emergency shelters (Ethos 2)                        | 795                                  | Official administrative data (SIAO) – April 2020    | 358                                   |
| Collective transitional shelters (Ethos 3)          | 634                                  | Official administrative data (SIAO) – April 2020    | 196                                   |
| Hostels mobilized during the covid crisis (Ethos 2) | 893                                  | Official administrative data (Service+) – July 2020 | 197                                   |
| Street (Ethos 1)                                    | ?                                    | No usable source of data                            | 98                                    |

\* *Adult homeless population living in the city of Marseille.* MDM (Médecins du Monde): Doctors of the World NGO; SIAO (Services intégrés de l'accueil et de l'orientation): Integrated reception and guidance services

**STROBE 2007 (v4) Statement—Checklist of items that should be included in reports of *cohort studies***

| Section/Topic                | Item # | Recommendation                                                                                                                                                                       | Reported on page #  |
|------------------------------|--------|--------------------------------------------------------------------------------------------------------------------------------------------------------------------------------------|---------------------|
| <b>Title and abstract</b>    | 1      | (a) Indicate the study's design with a commonly used term in the title or the abstract                                                                                               | 1                   |
|                              |        | (b) Provide in the abstract an informative and balanced summary of what was done and what was found                                                                                  | 2                   |
| <b>Introduction</b>          |        |                                                                                                                                                                                      |                     |
| Background/rationale         | 2      | Explain the scientific background and rationale for the investigation being reported                                                                                                 | 3                   |
| Objectives                   | 3      | State specific objectives, including any prespecified hypotheses                                                                                                                     | 3                   |
| <b>Methods</b>               |        |                                                                                                                                                                                      |                     |
| Study design                 | 4      | Present key elements of study design early in the paper                                                                                                                              | 3                   |
| Setting                      | 5      | Describe the setting, locations, and relevant dates, including periods of recruitment, exposure, follow-up, and data collection                                                      | 3-4                 |
| Participants                 | 6      | (a) Give the eligibility criteria, and the sources and methods of selection of participants. Describe methods of follow-up                                                           | 3                   |
|                              |        | (b) For matched studies, give matching criteria and number of exposed and unexposed                                                                                                  | NA                  |
| Variables                    | 7      | Clearly define all outcomes, exposures, predictors, potential confounders, and effect modifiers. Give diagnostic criteria, if applicable                                             | 4                   |
| Data sources/<br>measurement | 8*     | For each variable of interest, give sources of data and details of methods of assessment (measurement). Describe comparability of assessment methods if there is more than one group | 4                   |
| Bias                         | 9      | Describe any efforts to address potential sources of bias                                                                                                                            | 3-4                 |
| Study size                   | 10     | Explain how the study size was arrived at                                                                                                                                            | 3-4 and suppl. file |
| Quantitative variables       | 11     | Explain how quantitative variables were handled in the analyses. If applicable, describe which groupings were chosen and why                                                         | 3-4                 |
| Statistical methods          | 12     | (a) Describe all statistical methods, including those used to control for confounding                                                                                                | 4                   |
|                              |        | (b) Describe any methods used to examine subgroups and interactions                                                                                                                  | 4                   |
|                              |        | (c) Explain how missing data were addressed                                                                                                                                          | 4                   |
|                              |        | (d) If applicable, explain how loss to follow-up was addressed                                                                                                                       | 4                   |
|                              |        | (e) Describe any sensitivity analyses                                                                                                                                                | 4                   |
| <b>Results</b>               |        |                                                                                                                                                                                      |                     |

|                          |     |                                                                                                                                                                                                                                                                                                                                                                                                               |                     |
|--------------------------|-----|---------------------------------------------------------------------------------------------------------------------------------------------------------------------------------------------------------------------------------------------------------------------------------------------------------------------------------------------------------------------------------------------------------------|---------------------|
| Participants             | 13* | (a) Report numbers of individuals at each stage of study—eg numbers potentially eligible, examined for eligibility, confirmed eligible, included in the study, completing follow-up, and analysed<br>(b) Give reasons for non-participation at each stage<br>(c) Consider use of a flow diagram                                                                                                               | 3-4 and suppl. file |
| Descriptive data         | 14* | (a) Give characteristics of study participants (eg demographic, clinical, social) and information on exposures and potential confounders<br>(b) Indicate number of participants with missing data for each variable of interest<br>(c) Summarise follow-up time (eg, average and total amount)                                                                                                                | 5<br>5<br>5         |
| Outcome data             | 15* | Report numbers of outcome events or summary measures over time                                                                                                                                                                                                                                                                                                                                                | 5                   |
| Main results             | 16  | (a) Give unadjusted estimates and, if applicable, confounder-adjusted estimates and their precision (eg, 95% confidence interval). Make clear which confounders were adjusted for and why they were included<br>(b) Report category boundaries when continuous variables were categorized<br>(c) If relevant, consider translating estimates of relative risk into absolute risk for a meaningful time period | 5-7<br>5-7<br>5-7   |
| Other analyses           | 17  | Report other analyses done—eg analyses of subgroups and interactions, and sensitivity analyses                                                                                                                                                                                                                                                                                                                | 5                   |
| <b>Discussion</b>        |     |                                                                                                                                                                                                                                                                                                                                                                                                               |                     |
| Key results              | 18  | Summarise key results with reference to study objectives                                                                                                                                                                                                                                                                                                                                                      | 8-9                 |
| <b>Limitations</b>       |     |                                                                                                                                                                                                                                                                                                                                                                                                               |                     |
| Interpretation           | 20  | Give a cautious overall interpretation of results considering objectives, limitations, multiplicity of analyses, results from similar studies, and other relevant evidence                                                                                                                                                                                                                                    | 9                   |
| Generalisability         | 21  | Discuss the generalisability (external validity) of the study results                                                                                                                                                                                                                                                                                                                                         | 9                   |
| <b>Other information</b> |     |                                                                                                                                                                                                                                                                                                                                                                                                               |                     |
| Funding                  | 22  | Give the source of funding and the role of the funders for the present study and, if applicable, for the original study on which the present article is based                                                                                                                                                                                                                                                 | 12                  |

\*Give information separately for cases and controls in case-control studies and, if applicable, for exposed and unexposed groups in cohort and cross-sectional studies.

**Note:** An Explanation and Elaboration article discusses each checklist item and gives methodological background and published examples of transparent reporting. The STROBE checklist is best used in conjunction with this article (freely available on the Web sites of PLoS Medicine at <http://www.plosmedicine.org/>, Annals of Internal Medicine at <http://www.annals.org/>, and Epidemiology at <http://www.epidem.com/>). Information on the STROBE Initiative is available at [www.strobe-statement.org](http://www.strobe-statement.org).

# BMJ Open

## Cumulative incidence of SARS-CoV-2 infection within the homeless population: insights from a citywide longitudinal study

|                                 |                                                                                                                                                                                                                                                                                                                                                                                                                                                                                                                                                                                                                                                                                                                                                                                                                                                                                                                                                                                                                                                                                                                                                                                                                                                                                                                                                                                                                                                                                                                                                                                                                                                                     |
|---------------------------------|---------------------------------------------------------------------------------------------------------------------------------------------------------------------------------------------------------------------------------------------------------------------------------------------------------------------------------------------------------------------------------------------------------------------------------------------------------------------------------------------------------------------------------------------------------------------------------------------------------------------------------------------------------------------------------------------------------------------------------------------------------------------------------------------------------------------------------------------------------------------------------------------------------------------------------------------------------------------------------------------------------------------------------------------------------------------------------------------------------------------------------------------------------------------------------------------------------------------------------------------------------------------------------------------------------------------------------------------------------------------------------------------------------------------------------------------------------------------------------------------------------------------------------------------------------------------------------------------------------------------------------------------------------------------|
| Journal:                        | <i>BMJ Open</i>                                                                                                                                                                                                                                                                                                                                                                                                                                                                                                                                                                                                                                                                                                                                                                                                                                                                                                                                                                                                                                                                                                                                                                                                                                                                                                                                                                                                                                                                                                                                                                                                                                                     |
| Manuscript ID                   | bmjopen-2022-065734.R1                                                                                                                                                                                                                                                                                                                                                                                                                                                                                                                                                                                                                                                                                                                                                                                                                                                                                                                                                                                                                                                                                                                                                                                                                                                                                                                                                                                                                                                                                                                                                                                                                                              |
| Article Type:                   | Original research                                                                                                                                                                                                                                                                                                                                                                                                                                                                                                                                                                                                                                                                                                                                                                                                                                                                                                                                                                                                                                                                                                                                                                                                                                                                                                                                                                                                                                                                                                                                                                                                                                                   |
| Date Submitted by the Author:   | 14-Oct-2022                                                                                                                                                                                                                                                                                                                                                                                                                                                                                                                                                                                                                                                                                                                                                                                                                                                                                                                                                                                                                                                                                                                                                                                                                                                                                                                                                                                                                                                                                                                                                                                                                                                         |
| Complete List of Authors:       | <p>MOSNIER, Emilie; AP-HM, Department of Clinical Research and Innovation; Aix-Marseille Universite, 2. Aix Marseille Univ, INSERM, IRD, SESSTIM, Sciences Economiques &amp; Sociales de la Santé &amp; Traitement de l'Information Médicale, Aix Marseille Institute of Public Health ISSPAM loubiere, sandrine; APHM, Department of Clinical Research and Innovation, Support Unit for clinical research and economic evaluation; Aix-Marseille Universite, School of medicine – La Timone Medical Campus, EA 3279: CEReSS</p> <p>Monfardini, Elisabetta; AP-HM, Department of Psychiatry, Assistance Publique</p> <p>Alibert, Agathe; AP-HM, Department of Clinical Research and Innovation</p> <p>Landier, Jordi; IRD, 2. Aix Marseille Univ, INSERM, IRD, SESSTIM, Sciences Economiques &amp; Sociales de la Santé &amp; Traitement de l'Information Médicale, Aix Marseille Institute of Public Health ISSPAM</p> <p>Ninoves, Laetitia; Aix-Marseille Universite, 5. Unité des Virus Émergents (UVE: Aix-Marseille Univ—IRD 190—Inserm 1207—IHU Méditerranée Infection)</p> <p>Bosetti, Thomas; Médecins du Monde France</p> <p>AUQUIER, Pascal; Aix-Marseille University, EA 3279 (Santé Publique : Qualité de Vie et Maladies Chroniques)</p> <p>Mosnier, Marine; Médecins du Monde France</p> <p>Wakap, Stephanie Nguengang; Médecins du Monde France</p> <p>Warszawski, Josiane; CESP, CESP - Public Health; APHP</p> <p>Tinland, Aurelie; Aix-Marseille Universite, School of medicine – La Timone Medical Campus, EA 3279: CEReSS; APHM, Department of Clinical Research and Innovation, Support Unit for clinical research and economic evaluation</p> |
| <b>Primary Subject Heading</b>: | Epidemiology                                                                                                                                                                                                                                                                                                                                                                                                                                                                                                                                                                                                                                                                                                                                                                                                                                                                                                                                                                                                                                                                                                                                                                                                                                                                                                                                                                                                                                                                                                                                                                                                                                                        |
| Secondary Subject Heading:      | Public health, Infectious diseases                                                                                                                                                                                                                                                                                                                                                                                                                                                                                                                                                                                                                                                                                                                                                                                                                                                                                                                                                                                                                                                                                                                                                                                                                                                                                                                                                                                                                                                                                                                                                                                                                                  |
| Keywords:                       | EPIDEMIOLOGY, Public health < INFECTIOUS DISEASES, COVID-19                                                                                                                                                                                                                                                                                                                                                                                                                                                                                                                                                                                                                                                                                                                                                                                                                                                                                                                                                                                                                                                                                                                                                                                                                                                                                                                                                                                                                                                                                                                                                                                                         |
|                                 |                                                                                                                                                                                                                                                                                                                                                                                                                                                                                                                                                                                                                                                                                                                                                                                                                                                                                                                                                                                                                                                                                                                                                                                                                                                                                                                                                                                                                                                                                                                                                                                                                                                                     |



1  
2  
3  
4  
5  
6  
7  
8  
9  
10  
11  
12  
13  
14  
15  
16  
17  
18  
19  
20  
21  
22  
23  
24  
25  
26  
27  
28  
29  
30  
31  
32  
33  
34  
35  
36  
37  
38  
39  
40  
41  
42  
43  
44  
45  
46  
47  
48  
49  
50  
51  
52  
53  
54  
55  
56  
57  
58  
59  
60

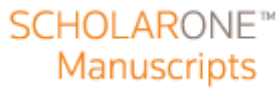



I, the Submitting Author has the right to grant and does grant on behalf of all authors of the Work (as defined in the below author licence), an exclusive licence and/or a non-exclusive licence for contributions from authors who are: i) UK Crown employees; ii) where BMJ has agreed a CC-BY licence shall apply, and/or iii) in accordance with the terms applicable for US Federal Government officers or employees acting as part of their official duties; on a worldwide, perpetual, irrevocable, royalty-free basis to BMJ Publishing Group Ltd ("BMJ") its licensees and where the relevant Journal is co-owned by BMJ to the co-owners of the Journal, to publish the Work in this journal and any other BMJ products and to exploit all rights, as set out in our [licence](#).

The Submitting Author accepts and understands that any supply made under these terms is made by BMJ to the Submitting Author unless you are acting as an employee on behalf of your employer or a postgraduate student of an affiliated institution which is paying any applicable article publishing charge ("APC") for Open Access articles. Where the Submitting Author wishes to make the Work available on an Open Access basis (and intends to pay the relevant APC), the terms of reuse of such Open Access shall be governed by a Creative Commons licence – details of these licences and which [Creative Commons](#) licence will apply to this Work are set out in our licence referred to above.

Other than as permitted in any relevant BMJ Author's Self Archiving Policies, I confirm this Work has not been accepted for publication elsewhere, is not being considered for publication elsewhere and does not duplicate material already published. I confirm all authors consent to publication of this Work and authorise the granting of this licence.

1  
2  
3 **Cumulative incidence of SARS-CoV-2 infection within the homeless population:**  
4 **insights from a citywide longitudinal study**  
5  
6  
7  
8  
9

10 Emilie Mosnier, PhD<sup>1,2\*</sup>; Sandrine Loubière, PhD <sup>1,4</sup>; Elisabetta Monfardini, PhD <sup>3</sup>; Agathe Alibert<sup>1</sup>; Jordi  
11 Landier, PhD <sup>2</sup>; Laetitia Ninoves, PhD <sup>5</sup>; Thomas Bosetti, MD<sup>6</sup>; Pascal Auquier, PhD <sup>4</sup>; Marine Mosnier<sup>6</sup>;  
12 Stephanie Nguengang Wakap, PhD <sup>7</sup>; Josiane Warszawski, PhD<sup>8</sup>; Aurélie Tinland, PhD <sup>3,4</sup>  
13  
14  
15

16 **Authors' Affiliations:**  
17

- 18 1. Department of Clinical Research and Innovation, Support Unit for clinical research and economic  
19 evaluation, Assistance Publique – Hôpitaux de Marseille, F-13385 Marseille, France
  - 20 2. Aix Marseille Univ, INSERM, IRD, SESSTIM, Sciences Economiques & Sociales de la Santé &  
21 Traitement de l'Information Médicale, Aix Marseille Institute of Public Health ISSPAM, F-13385  
22 Marseille, France
  - 23 3. Department of Psychiatry, Assistance Publique – Hôpitaux de Marseille, F-13385 Marseille, France
  - 24 4. Aix-Marseille University, School of medicine – La Timone Medical Campus, EA 3279: CEReSS –  
25 Health Service Research and Quality of Life Center, F-13005 Marseille, France
  - 26 5. Unité des Virus Émergents (UVE: Aix-Marseille Univ—IRD 190—Inserm 1207—IHU Méditerranée  
27 Infection), F-13385 Marseille, France
  - 28 6. Médecins du Monde – Doctors of the World, 13003 Marseille, France
  - 29 7. Médecins du Monde – Doctors of the World, Paris, France
  - 30 8. INSERM CESP U1018, Université Paris-Saclay, 94276 Le Kremlin-Bicêtre, France
- 31  
32  
33  
34  
35  
36  
37  
38

39 **Corresponding author :**

40 \*Dr Emilie Mosnier, MD, PhD, SESSTIM, Sciences Economiques & Sociales de la Santé & Traitement de  
41 l'Information Médicale, 27 boulevard Jean Moulin 13005 Marseille. Email : [emilie.mosnier@gmail.com](mailto:emilie.mosnier@gmail.com). Tel :  
42 +33 4.91.32.46.00  
43  
44

45 **Word count:** 3184  
46  
47  
48  
49  
50  
51  
52  
53  
54  
55  
56  
57  
58  
59  
60

**ABSTRACT**

**Objectives** The aim of this study was to determine the risk factors associated with SARS-CoV-2 infection in a cohort of homeless people using survival analysis. Seroprevalence in the homeless community was also compared to that of the general population.

**Design** Cohort Study

**Setting** Data were collected across two testing sessions, 3 months apart, during which each participant was tested for anti-SARS-CoV-2 antibodies and completed a face-to-face surveys.

**Participants** All homeless adults sleeping rough, in slums or squats, in emergency shelters or transitional accommodation in Marseille were eligible.

**Primary outcome measures** Occurrence of a seroconversion event defined as a biologically confirmed SARS-CoV-2 infection. Local data from a national seroprevalence survey were used for comparison between homeless people and the general population.

**Results** A total of 1249 people were included. SARS-CoV-2 seroprevalence increased from 6.0% [4.7-7.3] during the first session to 18.9% [16.0-21.7] during the second one, compared to 3.0% [1.9-4.2] and 6.5% [4.5-8.7] in the general population. Factors significantly associated with an increased risk of COVID-19 infection were: having stayed in emergency shelters (1.93 [1.18 – 3.15]), being an isolated parent (1.64 [1.07-2.52]) and having contact with more than 5-15 people per day (1.84 [1.27 – 2.67]). By contrast, smoking (0.46 (0.32 – 0.65)), having financial resources (0.70 (0.51 – 0.97)) and psychiatric or addictive comorbidities (0.52 (0.32 – 0.85)) were associated with a lower risk.

**Conclusion** We confirm that homeless people have higher infection rates than the general population, with increased risk in emergency shelters. There is growing evidence that, in addition to usual preventive measures, public policies should pay attention to adapt the type of accommodation and overall approach of precariousness.

**Data availability statement**

The datasets generated and analyzed during the current study are not publicly available due to special authorization to transfer databases given by the CNIL. Upon prior authorization by the CNIL, the dataset would be available from the corresponding author upon reasonable request. Additionally, the study protocol is available upon request. All data requests should be addressed to the corresponding author.

**Strengths and limitations of this study**

- Description of risk factors of SARS-CoV-2 infection in a large study population with high-quality and statistically robust methodology.
- First surveillance data from a cohort of homeless people providing an incidence rate of seroconversion and comparing seroprevalence with the general population at two different time points.
- Large number of people lost to follow-up and difficulties in following a cohort of homeless people who are highly mobile
- Sensitivity of detection by repeated serological tests.

**Keywords**

Homeless population, COVID-19, cohort study, seroprevalence, prevalence, SARS-CoV-2

## INTRODUCTION

The crisis generated by the COVID-19 pandemic suddenly widened the gap in access to healthcare, especially for vulnerable populations [1]. Before the pandemic, homelessness was already associated with higher health inequalities compared to the general population [2].

Public policies had to devise new strategies to limit the impact of the evolving pandemic on healthcare systems and societies. For example, the French Government imposed 2 stringent lockdowns in 2020. These restrictions were accompanied in most cities by a sheltering program for homeless people, with allocation of extra emergency shelters, transitional accommodations and requisitioned hotels [3]. In parallel however, there was a rise of precariousness in France, with an increase in the number of homeless people [4,5]. Studies show that homeless people are at high risk of developing SARS-CoV-2 infection and reinfection due to physical proximity, crowded emergency shelters and unsafe or unhygienic living conditions[6–8]. In this context, data on the spread of the SARS-CoV-2 virus and immunity among the homeless are essential to inform policy stakeholders and to contain epidemic dynamics.

In France, in May 2020, a nationwide study in the general population estimated that seroprevalence ranged from 3.5% (South East of France) to 10.8% (North East of France) [9], emphasizing the need for regionally specific data. This seroprevalence reflected the regional heterogeneity at the beginning of the pandemic. A high prevalence rate of SARS-CoV-2 infection was reported in people living in homeless shelters [7,10,11], which also showed a high rate of severe COVID-19 symptoms, potentially due to a lack of access to the health care and a high prevalence of comorbidities such as lung or heart diseases [12–14]. To our knowledge, there is no representative data of an entire homeless population to describe the dynamics of the prevalence of SARS-CoV-2 infection over time.

The aim of this study was to determine the risk factors associated with SARS-CoV-2 infection in a cohort of homeless people using survival analysis. Seroprevalence in the homeless community was also compared to that of the general population.

## METHODS

### Study Design

The present study was a descriptive and prospective cohort. Study design, participants and sampling were described in a previous study [15]. Each participant receives individualized follow-up and repeated testing at the inclusion and 3 month later. There was no resampling.

### Study Area and Population

The study area was the city of Marseille, the second largest city in France with 889,029 inhabitants, suffering from a high level of poverty [16].

#### Eligible population

Data from the local orientation system for emergency and transitional accommodation (SIAO) and the NGO Doctors of the World estimated that in 2020, at the beginning of the COVID-19 outbreak, there were 2,322 homeless adults living in emergency, transitional shelters or hostels and 619 to 817 living in squats or slums (Supplementary file 1). No point-in-time census was available for people living on the streets in Marseille.

#### Inclusion criteria

In order to focus on the homeless people the furthest from housing, we decided to select those characterized by the greatest residential instability: people sleeping rough, in squats or slums, in stabilization shelters, in emergency shelters or hostels, respectively corresponding to the following categories of the European typology of homelessness (ETHOS): ETHOS 1, 2, 3 and 8 [17].

#### Participant selection

In the absence of a point-in-time count, random sampling was impossible. We set a 2-month inclusion period, during which we systematically offered all homeless people aged over 18 to participate in the study. Recruitment of participants was also facilitated by the “Accès aux Soins des Sans Abris (ASSAb) network” of assistance to homeless people: 18 homeless outreach teams working in streets, hotels, squats or slums, 5 emergency shelters and 10 transitional accommodations.

#### Investigations

Two specific sessions of serological testing were conducted in order to assess seroprevalence. The first session lasted from June 5 to August 5, 2020, and the second from September 11 to December 18, 2020. At each session, each participant was tested using a rapid diagnostic serological test, and completed a face-to-face survey investigating: socio-demographic characteristics; comorbidities; past and current medical history of COVID-19; difficulties in access to care, water, food or hygiene supplies; compliance with the preventive measures (social

1  
2  
3 distancing, wearing a face mask, and hand washing). Questions were asked by trained local interviewers in the  
4 participants' native language to improve comprehension and to minimize the information bias.  
5

### 6 **Community Engagement and Medical Care**

7 Community awareness interventions were conducted during the two testing sessions, to secure the commitment  
8 and participation of a majority of homeless people. Community engagement started by meetings with the  
9 community leaders or mediators but also the healthcare workers and the members of local institutions or NGOs  
10 implicated in health for homeless people with the help of a local network (ASSAB) in charge of coordination with  
11 these different stakeholders. Interviewers were sensitized to the study objectives, interventions and expected role  
12 of the community. A mobile team including an infectious disease specialist, a nurse and a community mediator  
13 followed the positive cases.

14 **Patients and public involvement:** Public were involved in conduct (questionnaire were conducted by peer  
15 workers) and dissemination plans of this research (the results were presented to the public via photo and sound  
16 exhibitions and radio broadcasts in Marseille city).  
17

### 18 **Field Biological Analysis**

19 We used the rapid serological test "Biosynex COVID-19 BSS®", that detects immunoglobulin M (IgM) and G  
20 (IgG) in 10 minutes with high specificity and sensitivity (>95% and 90% respectively) [18].  
21  
22

### 23 **Data Analysis**

24  
25 Descriptive analyses of sociodemographic characteristics were performed using numbers and percentage for  
26 categorical data, or medians and interquartile range (IQR) for quantitative data. The seroprevalence of COVID-19  
27 infection was investigated between February 1, 2020 and December 18, 2020. All the participants were considered  
28 to have a negative serology on February 1, 2020 before the first cases were detected in early March 2020 in  
29 Marseille. In the event of seroconversion, infection was reported as confirmed at the time of serological testing,  
30 with the possibility of overestimating the number of person-days before infection and regardless of the results of  
31 subsequent serological tests. This methodological choice was made in relation to the different predictive variables  
32 also collected at the time of the serological test. To assess seroprevalence rate according to presence or absence of  
33 symptoms, bootstrap resampling approach with a set of 1,000 samples was used to create 95% confidence intervals  
34 (CI) based on IgM/IgG sensitivity and specificity and their 95%CI. Kaplan-Meier methods along with the log rank  
35 test were used to establish statistical differences in seroprevalence rates between types of ETHOS accommodation  
36 [17]. A survival analysis was carried out to address the spread of COVID 19 among the targeted population. The  
37 time (in months) was defined as follows: the starting date was the date of February 01 2020, date at which none  
38 positive cases were registered in Marseille, that is a when all participants could be considered to have a COVID19-  
39 negative status. The event was a positive SARS-CoV-2 status, whatever a positive SARS-CoV-2 PCR or a positive  
40 serological test informed the diagnosis. His or her status was considered positive regardless of the results of  
41 subsequent serological tests. For those with a PCR test achieved, the date of the event corresponded to the PCR  
42 date, corrected with the date of the first symptoms when reported. For positive participant with a rapid serological  
43 test, the reported date of the first symptoms was considered. For participant with a positive serological test but  
44 with no history of symptoms, we considered the date of the testing strategy performed by the research team. No  
45 additional corrections were made in absence of any informative data. Participants tested negative at the first testing  
46 wave but being lost to follow up at the second testing wave were censored at the date of the last collection data.  
47 The cut-off date was December 18 2020, precisely 11.2 months after the starting date. A Cox model was performed  
48 using both baseline covariates and time-dependent covariates. Time-dependent covariates were the following: type  
49 of ETHOS accommodation (i.e. street, emergency shelters, hotels, transitional shelter or squat/slum), type of  
50 accommodation (private or shared room/area), number of contacts per day, having financial resources and having  
51 work. We fitted a multivariate Cox model by considering as eligible variables those that were significant in a  
52 univariate analysis at the 5% level, and considering all pairwise interactions. The covariate "number of contacts  
53 per day" was forced into the model as it was considered to be a relevant variable. We tested the assumption of  
54 proportional hazards using Schoenfeld residuals. Then, we used the Stepwise selection function in R, which starts  
55 with an empty model and adds/removes predictors according to AIC criteria. Unadjusted and adjusted Hazard  
56 ratios (HR) and 95 % CI were given.

57 All of the statistical analyses were carried out using R software, and differences with p values of <0.05 were  
58 considered statistically significant.

59 Seroprevalence data of our study were compared with data from a representative sample of the general population  
60 living in Marseille, which were derived from a national seroprevalence survey (EpiCov) [19]. Results of

seroprevalence in the general population were obtained from home self-samples of dried blood spots, in order to detect IgG antibodies (Euroimmun ELISA-S) [19].

All the confirmed cases of COVID-19 by positive SARS-CoV-2 PCR in Marseille registered from January 1 to December 31, 2020, by the French national monitoring department (SI-DEP) from *Santé Publique France* [20], were used to describe the local incidence rate of COVID-19 infection in cases per person-weeks.

## RESULTS

During the first session from June 5 to August 5, 2020, 1241 people were included. Median age was 38 years [IQR 22], 70.40% were men (n=874) with 98 (8.1%) of participants living rough, 358 (29.5%) in emergency shelters, 197 (16.2%) in hostels, 196 (16.2%) in transitional shelters, and 363 (29.9%) in squats and slums (Table 1). Approximately 37% of eligible ETHOS 2,3 and 8 participants were included in the study (Supplementary file 1). Around half of the participants, 52.2% (n=648/1241), had confirmed or possible risk factors for severe COVID-19 disease, including cancer, obesity, cardiac or pulmonary disease and severe renal insufficiency. In addition, half of the participants (52.0%, n=645) reported active tobacco consumption. A total of 58.1% (n=721) of the participants tested during the first session were also tested at the second session.

**Table 1: Population characteristics (n=1241)**

| <i>Baseline characteristics</i> | <i>n (%) or median [IQR]</i> |
|---------------------------------|------------------------------|
| Gender                          |                              |
| Men                             | 874 (70.4%)                  |
| Women                           | 367 (29.6%)                  |
| Age, median, years              | 38 [22]                      |
| Age <= 65 years                 | 1179 (95.0%)                 |
| French Nationality              | 222 (18.4%)                  |
| Country of Birth                |                              |
| France                          | 234 (18.9%)                  |
| Europe                          | 416 (33.5%)                  |
| Africa                          | 282 (22.7%)                  |
| Other                           | 279 (22.5%)                  |
| Missing                         | 30 (2.4%)                    |
| Educational attainment          |                              |
| None                            | 560 (45.1%)                  |
| Lower secondary                 | 445 (35.9%)                  |
| Upper secondary or vocational   | 122 (9.8%)                   |
| Missing                         | 114 (9.2%)                   |
| Household status                |                              |
| Isolated adult                  | 660 (53.2%)                  |
| Isolated parent                 | 129 (10.4%)                  |
| Family                          | 411 (33.1%)                  |
| Missing                         | 41 (3.3%)                    |
| Health insurance                |                              |
| No                              | 345 (27.8%)                  |
| Yes                             | 826 (66.6%)                  |
| Missing                         | 70 (5.6%)                    |
| Financial resources             |                              |
| No                              | 448 (36.1%)                  |
| Yes                             | 730 (58.8%)                  |
| Missing                         | 63 (5.1%)                    |
| Working situation <sup>a</sup>  |                              |
| No                              | 949 (76.5%)                  |
| Yes                             | 229 (18.5%)                  |
| Missing                         | 63 (5.1%)                    |
| Total length of homelessness    |                              |
| <= 5 years                      | 775 (62.4%)                  |
| > 5 years                       | 393 (31.7%)                  |
| Missing data                    | 73 (5.9%)                    |
| Typology ETHOS*                 |                              |
| ETHOS 1: street                 | 98 (8.1%)                    |
| ETHOS 2: emergency shelters     | 358 (29.5%)                  |
| ETHOS2: hotels                  | 197 (16.2%)                  |
| ETHOS 3: transitional shelters  | 196 (16.2%)                  |
| ETHOS 8: squats, slums          | 363 (29.9%)                  |
| Type of accommodation           |                              |
| Private room or area            | 524 (42.2%)                  |
| Shared room or area             | 648 (52.2%)                  |
| Missing data                    | 69 (5.6%)                    |
| Number of contacts per day      |                              |
| <= 5                            | 714 (58.0%)                  |

1  
2  
3  
4  
5  
6  
7  
8  
9  
10  
11  
12  
13  
14  
15  
16  
17  
18  
19  
20  
21  
22  
23  
24  
25  
26  
27  
28  
29  
30  
31  
32  
33  
34  
35  
36  
37  
38  
39  
40  
41  
42  
43  
44  
45  
46  
47  
48  
49  
50  
51  
52  
53  
54  
55  
56  
57  
58  
59  
60

|                                        |         |             |
|----------------------------------------|---------|-------------|
|                                        | 5 to 15 | 410 (33.3%) |
|                                        | >15     | 107 (8.7%)  |
| Tobacco consumption                    |         |             |
|                                        | No      | 480 (38.7%) |
|                                        | Yes     | 645 (52.0%) |
|                                        | Missing | 116 (9.3%)  |
| Comorbidity                            |         |             |
| Psychiatric or addictive comorbidities |         | 295 (23.8%) |
| Obesity                                |         | 72 (6.5%)   |
| Diabetes                               |         | 91 (8.1%)   |
| Chronic Respiratory Pathology          |         | 99 (9.2%)   |
| Cardiovascular Pathology               |         | 152 (14.1%) |
| Chronic renal failure with dialysis    |         | 23 (2.1%)   |
| Cancer                                 |         | 24 (2.2%)   |

SD: Standard Deviation; IQR: Inter Quartile Range.

a: declared or undeclared employment.

\*ETHOS: European Typology on Homelessness and Housing Exclusion [17]

A total of 74/1241 of participants had positive serology in the first campaign, with 2.5% of positive IgM tests, 5.2% positive IgG tests and 1.7% positive IgM and IgG tests. In the second campaign, 136/721 of participants had positive serology with 8.1% of positive IgM tests, 17.5% positive IgG tests and 6.8% positive IgM and IgG tests. Of the 74 participants with positive serology at the start of the study, 43 were able to be followed up and have a new serology 3 months later. A total of 69.8% (n=30) still had positive serology. Thus, in 30.2% of cases (n=13) there was a rapid negatigation of serology.

Seroprevalence was 6.0% (IQR 4.7-7.3) (n=1241) in the first campaign and 18.9% (IQR 16.0-21.7) (n=721) in the second campaign, and had significantly increased (p<0.005) (Figure 1. In comparison, seroprevalence in the general population in Marseille (EpiCoV-Marseille) was 3.0% [1.9-4.2] in May to June and 6.5% (CI95% 4.5-8.7) in November to December 2020 and had significantly increased (p<0.005) (Figure1).

**Factors Associated with SARS-CoV-2 Infection**

A total of 180 participants presented a SARS-CoV-2 seroconversion defined by a positive serology result for SARS-CoV-2 (IgM or IgG). At inclusion (n=74/1241) or as part of the cohort follow-up (n=136/721). Average time of infection from February 1, 2020 was 230 days (IQR 162-277). Figure 2 shows the Kaplan Meier curves according to the participant’s type of accommodation. Homeless people living in emergency shelters and hotels had a significantly higher risk of SARS-CoV-2 infection compared to their counterparts over the study follow-up period (p<0.001).

Table 2 shows univariate and multivariate analysis of the factors associated with the SARS-CoV-2 seroprevalence. Univariate analysis identified an association between positive serological results and participants coming from Africa (2.51 (1.45 – 4.33)) or those applying physical distancing (1.61 (1.14 – 2.27)). These two variables were not retained in the final model. Difficult access to hygiene products was also associated with lower seroprevalence in univariate analysis (0.72 (0.52 – 0.96)) but not in multivariate analysis. Being an isolated parent (1.64 (1.07 – 2.52)), spending more than 33% (1.70 (1.11 – 2.62)) or 66% (1.93 (1.18 – 3.15)) of time living in an emergency shelter during follow-up, and having between 5 to 15 daily contacts (1.84 (1.27 – 2.67)), were associated with SARS-CoV-2 infection in multivariate analysis. By contrast, having financial resources (1.64 (1.07 – 2.52)), being a smoker at the time of the survey (0.46 (0.32 – 0.65)) and having psychiatric or addictive comorbidities (0.52 (0.32 – 0.85)) were associated with a lower risk of SARS-CoV-2 seroprevalence. Figure 3 summarizes the Cox multivariable regression analysis. Other potential risk factors, such as educational attainment, gender, age, total length of homelessness in the life of participants, wearing a mask, hand washing, difficult access to water or not having health insurance were not associated with SARS-CoV-2 prevalence.

**Table 2: Univariate and multivariable analysis of the seroprevalence of SARS-CoV-2 infection (n=180/1241) between February and December 2020 in homeless people living in Marseille**

| Results    | Univariate analysis |                    | p-value | Multivariate analysis <sup>‡</sup> |
|------------|---------------------|--------------------|---------|------------------------------------|
|            |                     | HR (CI95%)         |         | Adjusted HR (CI95%)                |
| Gender     |                     |                    |         |                                    |
|            | Men                 | ref                |         |                                    |
|            | Women               | 0.97 (0.70 - 1.34) | 0.900   |                                    |
| Age, years |                     |                    |         |                                    |



|    |                                              |                               |                    |                          |                           |
|----|----------------------------------------------|-------------------------------|--------------------|--------------------------|---------------------------|
| 1  |                                              |                               |                    |                          |                           |
| 2  |                                              |                               |                    |                          |                           |
| 3  |                                              | <=65                          | Ref                |                          |                           |
| 4  |                                              | >65                           | 1.66 (0.99 – 2.77) | 0.050                    |                           |
| 5  | Country of Birth                             |                               |                    |                          |                           |
| 6  |                                              | France                        | ref                |                          |                           |
| 7  |                                              | Europe                        | 1.45 (0.83 – 2.55) | 0.193                    |                           |
| 8  |                                              | Africa                        | 2.51 (1.45 – 4.33) | <b>0.001<sup>£</sup></b> |                           |
| 9  |                                              | Other                         | 2.80 (1.63 – 4.79) | <0.001                   |                           |
| 10 | Educational attainment                       |                               |                    |                          |                           |
| 11 |                                              | None                          | ref                |                          |                           |
| 12 |                                              | Lower secondary               | 1.32 (0.96 – 1.82) | 0.090                    |                           |
| 13 |                                              | Upper secondary or vocational | 1.14 (0.63 – 2.05) | 0.670                    |                           |
| 14 | Household status                             |                               |                    |                          |                           |
| 15 |                                              | Isolated adult                | ref                |                          | ref                       |
| 16 |                                              | Isolated parent               | 1.78 (1.18 – 2.67) | <b>0.006</b>             | <b>1.64 (1.07 – 2.52)</b> |
| 17 |                                              | Family                        | 0.78 (0.55 – 1.11) | 0.168                    | 0.78 (0.50 – 1.20)        |
| 18 | Health insurance                             |                               |                    |                          |                           |
| 19 |                                              | No                            | Ref                |                          |                           |
| 20 |                                              | Yes                           | 0.96 (0.69 – 1.34) | 0.800                    |                           |
| 21 | Having financial resources                   |                               |                    |                          |                           |
| 22 |                                              | No                            | Ref                |                          | Ref                       |
| 23 |                                              | Yes                           | 0.64 (0.47 – 0.86) | <b>0.003</b>             | <b>0.70 (0.51 – 0.97)</b> |
| 24 | Having work                                  |                               |                    |                          |                           |
| 25 |                                              | No                            | Ref                |                          |                           |
| 26 |                                              | Yes                           | 0.71 (0.45 – 1.12) | 0.110                    |                           |
| 27 | Total length of homelessness                 |                               |                    |                          |                           |
| 28 |                                              | <= 5 years                    | ref                |                          |                           |
| 29 |                                              | > 5 years                     | 0.95 (0.69 – 1.30) | 0.700                    |                           |
| 30 | Percent of time spent in emergency shelters* |                               |                    |                          |                           |
| 31 |                                              | <33%                          | Ref                |                          | ref                       |
| 32 |                                              | 33 to 66%                     | 1.68 (1.15 – 2.46) | <b>0.007</b>             | <b>1.70 (1.11 – 2.62)</b> |
| 33 |                                              | >66%                          | 2.45 (1.59 – 3.76) | <b>&lt;0.001</b>         | <b>1.93 (1.18 – 3.15)</b> |
| 34 | Number of daily contacts                     |                               |                    |                          |                           |
| 35 |                                              | <=5 per day                   | Ref                |                          | Ref                       |
| 36 |                                              | >5 to <=15 per day            | 1.21 (0.88 – 1.65) | 0.100 <sup>£</sup>       | <b>1.84 (1.27 – 2.67)</b> |
| 37 |                                              | >15 per day                   | 0.68 (0.33 – 1.40) | 0.200                    | 1.45 (0.69 – 3.04)        |
| 38 | Wearing mask                                 |                               |                    |                          |                           |
| 39 |                                              | No, somewhat no               | Ref                |                          |                           |
| 40 |                                              | Yes, somewhat yes             | 1.23 (0.85 – 1.78) | 0.300                    |                           |
| 41 | Physical distancing                          |                               |                    |                          |                           |
| 42 |                                              | No, somewhat no               | Ref                |                          |                           |
| 43 |                                              | Yes, somewhat yes             | 1.61 (1.14 – 2.27) | <b>0.007<sup>£</sup></b> |                           |
| 44 | Hand washing                                 |                               |                    |                          |                           |
| 45 |                                              | No, somewhat no               | ref                |                          |                           |
| 46 |                                              | Yes, somewhat yes             | 1.43 (0.99 – 2.06) | 0.060                    |                           |
| 47 | Difficult access to hygiene products         |                               |                    |                          |                           |
| 48 |                                              | No, never, rarely             | Ref                |                          | ref                       |
| 49 |                                              | Yes, always, often            | 0.72 (0.52 – 0.96) | <b>0.040</b>             | 0.75 (0.50 – 1.12)        |
| 50 | Difficult access to water                    |                               |                    |                          |                           |
| 51 |                                              | No, never, rarely             | Ref                |                          |                           |
| 52 |                                              | Yes, always, often            | 0.76 (0.54 – 1.09) | 0.100                    |                           |
| 53 | Difficult access to food                     |                               |                    |                          |                           |
| 54 |                                              | No, never, rarely             | Ref                |                          |                           |
| 55 |                                              | Yes, always, often            | 0.83 (0.62 – 1.12) | 0.200                    |                           |
| 56 | Smoking status                               |                               |                    |                          |                           |
| 57 |                                              | Non smoker                    | Ref                |                          | ref                       |
| 58 |                                              | Smoker                        | 0.39 (0.28 – 0.53) | <b>&lt;0.001</b>         | <b>0.46 (0.32 – 0.65)</b> |
| 59 | Psychiatric or addictive comorbidity         |                               |                    |                          |                           |
| 60 |                                              | No                            | Ref                |                          | ref                       |
|    |                                              | Yes                           | 0.46 (0.30 – 0.69) | <b>&lt;0.001</b>         | <b>0.52 (0.32 – 0.85)</b> |

\$: total of participants in the analysis: 1241; missing values exist for some of the independent variables; for example smoking status (n=116), educational attainment (n=114), health insurance (n=70), self-reported financial resources (n=63) or household status (n=41).

\*: Percentage was calculated on the basis of each participant's exposed time until the event or until the end of the follow-up in the absence of an event.

£: We fitted a multivariable model containing all variables that were significant in a univariate analysis at the 10% level. We used the Stepwise selection function in R (a mix between forward and backward selection), which starts with an empty model and adds predictors according to AIC criteria. Accordingly, "Country of birth" and "physical distancing" were considered in the multivariate model and removed. In addition, "number of contacts" was forced into the model as a relevant variable.

### Symptomatology of participants with positive SARS-CoV-2 serological status

Among participants with SARS-CoV-2 infection (positive IgM or IgG or both, n=180), 67.6% reported no symptoms (Table 3). Among participants with symptomatic SARS-CoV-2 infections, the most common symptoms were fever, cough, headache and fatigue. Even if participants with a positive serological status reported Covid-19 syndrome (fever, cough, anosmia, headache notably) significantly more often than participants without serological immunity (Table 3), the frequency of symptoms reported did not appear to be strictly specific to SARS-CoV-2 infection.

**Table 3: Symptoms reported in the last 3 months prior the serological test according to serological status (n=1241)**

|                                          | Negative serological status<br>n (%) | CI95% <sup>s</sup> | Positive serological status<br>n (%) | CI95% <sup>s</sup> | P-value |
|------------------------------------------|--------------------------------------|--------------------|--------------------------------------|--------------------|---------|
| Individuals missing symptom data (n=303) | 302 (24.3%)                          |                    | 1 (0.1%)                             |                    |         |
| Individuals with symptom data (n=938)    | 759 (75.7%)                          |                    | 179 (99.9%)                          |                    |         |
| Asymptomatic patient                     | 656 (86.4%)                          | (84.7 – 91.4)      | 121 (67.6%)                          | (65.8 – 71.5)      | <0.001  |
| Participants with symptoms               | 103 (13.6%)                          | (11.7 – 14.3)      | 58 (32.4%)                           | (30.6 – 34.1)      |         |
| Fever                                    | 42 (4.0%)                            | (2.1 – 4.1)        | 36 (18.0%)                           | (16.1 – 18.9)      | <0.001  |
| Cough                                    | 38 (3.7%)                            | (1.8 – 3.8)        | 28 (14.0%)                           | (12.1 – 14.6)      | <0.001  |
| Dyspnea                                  | 16 (1.5%)                            | (0.0 – 1.5)        | 8 (4.0%)                             | (2.1 – 4.1)        | 0.040   |
| Headache                                 | 41 (3.9%)                            | (2.0 – 4.0)        | 36 (18.0%)                           | (16.2 – 18.9)      | <0.001  |
| Anosmia                                  | 15 (1.4%)                            | (0.0 – 1.4)        | 21 (10.5%)                           | (8.6 – 10.9)       | <0.001  |
| Rhinitis                                 | 39 (3.7%)                            | (1.8 – 3.8)        | 21 (10.5%)                           | (8.6 – 10.9)       | <0.001  |
| Fatigue                                  | 35 (3.4%)                            | (1.5 – 3.5)        | 38 (19.0%)                           | (17.1 – 20.0)      | <0.001  |
| Diarrhoea                                | 15 (1.4%)                            | (0.0 – 1.4)        | 15 (7.5%)                            | (5.6 – 7.8)        | <0.001  |
| Joint pain                               | 15 (1.4%)                            | (0.0 – 1.4)        | 19 (9.5%)                            | (7.6 – 10.0)       | <0.001  |
| Odynophagia                              | 22 (2.1%)                            | (0.0 – 2.1)        | 14 (7.0%)                            | (5.1 – 7.3)        | <0.001  |
| Chills                                   | 21 (2.0%)                            | (0.0 – 2.0)        | 17 (8.5%)                            | (6.6 – 8.8)        | <0.001  |
| Mottling                                 | 1 (0.1%)                             | (0.0 – 0.1)        | 0 (0%)                               | (0.0 – 0.1)        | 0.999   |
| Skin rash                                | 1 (0.1%)                             | (0.0 – 0.1)        | 3 (1.5%)                             | (0.0 – 1.5)        | 0.014   |
| Conjunctivitis                           | 9 (0.8%)                             | (0.0 – 0.7)        | 8 (4.0%)                             | (2.1 – 4.1)        | 0.002   |
| Other                                    | 5 (0.5%)                             | (0.0 – 0.4)        | 2 (1.0%)                             | (0.0 – 0.9)        | 0.316   |

CI95%: confidence interval at 95%

§: an exact test of a simple null hypothesis about the probability of success in a Bernoulli experiment was performed, with confidence level for the returned confidence interval.

## DISCUSSION

The present study is the first to describe the dynamics of SARS-CoV-2 seroprevalence among a large cohort of 1241 homeless people living in Marseille, France. Analysis of data from homeless participants with positive serology results over time, revealed a high prevalence of asymptomatic infection and significant associations between positive serology and the lack of financial resources, being an isolated parent, having between 5 and 15 daily contacts, and the time spent in emergency shelters. Repeated seroprevalence studies enabled to estimate the cumulative incidence of SARS-CoV-2 infection in both asymptomatic and symptomatic people, offering valuable data to inform public health policy-makers [7,21]. In the general population, asymptomatic individuals represent up to 68% of SARS-CoV-2 infections [7,22] and contribute to the rapid spread of the disease [1]. In our study, the estimated prevalence of SARS-CoV-2 increased from 6.01% [4.68-7.34] in June to August to 18.86% [16.00-21.72] in September to December and remained higher than in the general population. Indeed, a cross-sectional study evaluating the seroprevalence of SARS-CoV-2 antibodies across the general population in Marseille in May and November, 2020, found 3.0% [1.9-4.2] and 6.5% (CI95% 4.5 – 8.7), respectively. The increasing gap in seroprevalence between the general population and the homeless population may be due to a potential breakdown of protective measures for people in the most precarious situations [5]. The available data on homeless people comes from cross-sectional studies, that mainly found high seroprevalence [7,10,11]. However, the testing approach was different and concerned a population selected from one type of accommodation (mainly emergency shelters) and results also depend on the intensity of the local epidemic at the time of the survey. A lower infection rate with increasing age was reported in several population-based serological studies, which is not consistent with

1  
2  
3 our findings [23,24]. We observed no differences, in univariate analysis, in estimated seropositivity for older  
4 participants or for participants who had comorbidities. These results suggest that aged homeless people at risk of  
5 severe COVID-19 disease may be infected by SARS CoV-2 at the same rate as other adults. The pandemic has  
6 played an important role in amplifying health inequalities that already existed [25,26]. Increasing evidence has  
7 emerged, highlighting that COVID-19 mortality is higher for those who are socioeconomically deprived. We  
8 reported in our findings, in addition to the poorest condition of homelessness, that not having financial resources  
9 during the pandemic crisis was also a risk factor of SARS-CoV-2 seroprevalence. The link between socioeconomic  
10 status and development of infectious disease is well documented, and the main mechanisms reported to be  
11 associated with higher occurrence rates of communicable diseases included poor housing, lack of education,  
12 nutritional deficiencies, poor work conditions and hygiene [27].

13 African homeless immigrants had higher SARS-CoV-2 prevalence rates in our study compared to other  
14 nationalities. This is despite the fact that North and Sub-Saharan Africans are grouped together for analysis in our  
15 study. These findings were consistent with French, English or US studies which reported higher seroprevalence  
16 rates and mortality in black ethnic groups [9,28,29]. The homeless are a heterogeneous population. Even if  
17 homeless people already face disparity in health outcomes in the current COVID-19 pandemic, African immigrants  
18 are a subgroup at even more risk. Thus, it could be important to generate accessible health information and  
19 preventive measures for this subgroup, adapted to their literacy and specific needs.

20 Our study reported lower SARS-CoV-2 infection rates in participants with mental disorders or substance abuse.  
21 This is surprising since substance use disorders have frequently been reported to increase the risk of infectious  
22 diseases and mental illness to impact awareness of vulnerability to infection and help-seeking when symptoms of  
23 COVID-19 develop [30,31]. Since social contacts are the way in which the infection is spread, this lower  
24 seroprevalence could be interpreted as a sign of exclusion of these particularly stigmatized people [32]. It should  
25 also be noted that in Marseille there are specific healthcare mobile teams for people suffering from mental disorders  
26 and substance abuse [33]. This type of specific program has previously reported positive results in pandemic  
27 context [34].

28 In line with the findings of other studies, we observed a considerable proportion of positive subjects (67.6%) with  
29 asymptomatic infection [22,35,36]. Some symptoms (fever, cough, headache or fatigue notably) were significantly  
30 associated with positive SARS-CoV-2 serology and should be repeated to people during interventions on  
31 prevention and information.

32 As previously described, smoking prevalence was lower in seropositive SARS-CoV-2 participants in our study  
33 [37]. Even if prevalence was lower, smoking was associated with an increased risk of hospitalization and morbidity  
34 [38]. In our study, a substantial proportion of participants reported alcohol and tobacco consumption. In homeless  
35 populations a large proportion of deaths are therefore substance-attributable [39].

36 Our study reinforces the negative role of overcrowded types of accommodation for homeless people, which  
37 increase SARS-CoV-2 transmission. In the USA and France, emergency shelters and their high population density  
38 appear to increase the risk of infection [7,11]. Indeed, the emergency shelters are short term shelters that can  
39 accommodate several hundred people in Marseille with common sanitary facilities [40]. Collective transitional  
40 shelters are longer term, smaller facilities offering more consistent social work. The first French lockdown was  
41 ordered on March 17, 2020, as emergency shelters are already full in normal times, hotels were required. In these  
42 hotels, people did not have kitchen facilities and often found themselves in high-density grouping areas, especially  
43 at meal times or in the few outdoor spaces available [40]. Shelters should be considered as high-risk environments  
44 and stays there should be limited to the minimum. Providing adequate housing with individual bathroom facilities  
45 could be the most effective strategy for mitigating SARS-CoV-2 transmission in homeless communities, as was  
46 reported in a modeling study and by field healthcare workers [41,42]. Our findings also show an association with  
47 a high prevalence in shelters and hostels, which highlights the limits of individual preventive measures in  
48 transitional collective accommodations. These studies illustrate a good compliance with preventive measures,  
49 notably in collective accommodations, but these are clearly insufficient to limit the spread of infection. Homeless  
50 people in the pandemic must face concurrent risks: the risk of SARS-CoV-2 infection in shelters and collective  
51 accommodation, and the risk of the lack of access to food, water or hygiene products in more insecure housing  
52 conditions [43].

53 Throughout the course of the pandemic, healthcare and housing programs for homeless people have been modified.  
54 However, our results suggest that overcrowded and large emergency shelters or transitional accommodation  
55 including hostels increase the risk of SARS-CoV-2 transmission which pleads to adapt social and public health  
56 infrastructures towards good quality, smaller and semi-private accommodation. Holistic action (food, hygiene and  
57 financial support, health insurance, specific vaccination program...) must also be taken to ensure that the needs of  
58 these individuals are met sufficiently for them to be able to limit viral spread, survive this pandemic and be well  
59 enough equipped to endure the following economic crisis.

60 In addition, our findings highlight two other risk factors linked to socioeconomic inequalities: the lack of financial  
resource and being an isolated parent. Furthermore, people with low financial resources or single parents with one

child are potentially more likely to seek outside support which may increase the risk of viral exposure, as it was previously described for people who have to work outside [44].

### Strengths and limitations

Our study has number of strengths. Although studies have shown an increased risk of SARS-CoV-2 infection in homeless people, this is the first surveillance data from a cohort providing an incidence rate of seroconversion and comparing seroprevalence with the general population at two different time points. Our study described risk factors of SARS-CoV-2 infection in a large study population with high-quality and statistically robust methodology. Our findings quantify the excess risk associated with staying in emergency shelters. We also found evidence of SARS-CoV-2 infection among the most economically vulnerable (lack of financial resources, isolated parent) highlighting the need for a comprehensive and proactive approach including financial aid, food, water, adequate housing, mobile healthcare and social assistance for this vulnerable population.

Our study has also some limitations. Although it is representative of different homelessness categories (living in the street, slum, squat, emergency shelter or transitional accommodation), the sample was not randomly enrolled and therefore our findings may not reflect true seroprevalence, as a potential selection bias cannot be excluded. Characteristics of study participants upon inclusion and at the end of follow-up were also different, roofless and younger populations were most frequently lost to follow-up because of a higher mobility. We may also underestimate seroprevalence and false negative results cannot be excluded [45,46]. Finally, the serological tests between the general population and the homeless population were not exactly the same. This may account for some of the observed differences in seroprevalence rates between the two populations.

### Policy implications and further research

There is growing evidence that, in addition to usual preventive measures, public policies should pay attention to adapt the type of accommodation and overall approach of precariousness. The findings of this study can guide European and other governments' disease control planning; to find optimal solutions to house people in less crowded accommodations, prioritizing individual rather than collective settings and a global approach, thus restricting transmission. To complete these results, future studies in this vulnerable population should assess the morbidity and mortality associated with SARS-CoV-2.

### CONCLUSIONS

The longitudinal cohort of homeless people in Marseille revealed an increase in the seroprevalence of SARS-CoV-2 infection. This was higher than that observed in the general population and reflects precarious living conditions and inadequate types of accommodation for this vulnerable population.

**Contributorship statement:** First draft of the manuscript: EmM, SL, EIM, AT. Contributed to writing the manuscript: EmM, SL, EIM, AA, JL, LN, TB, MM, SNW, JW and AT. EM, TB and MM collected the data and samples. EmM, LN, MM performed biological analysis. Data analysis: EmM, SL, AA, AT. Study design: EmM, SL, TB, AT. All authors contributed to subsequent drafts and have reviewed and agreed with the content of the final manuscript.

**Competing Interests:** The authors declare that they have no competing interests.

**Funding:** This work was supported by the French Directorate of Health care facilities (DGOS) – research grant PHRC COVID-19 (COVID-homeless-0047)

### Data sharing statement

The datasets generated and analyzed during the current study are not publicly available due to special authorization to transfer databases given by the CNIL. Upon prior authorization by the CNIL, the dataset would be available from the corresponding author upon reasonable request. Additionally, the study protocol is available upon request. All data requests should be addressed to the corresponding author.

### Ethics statements

*Patient consent for publication*

Not applicable

*Ethical Approval*

All participants provided a written informed consent. The COVIDHomeless study was designed and carried out in compliance with the Declaration of Helsinki and with legal and regulatory provisions. It was approved by the ethics committee on May 28, 2020 (CPP IDF VI - number 44-20; ID: 2020-AO1398-31). The database was anonymized and declared to the French data protection commission (*Commission Nationale de l'Informatique et des Libertés*, CNIL, n°2018172v0).

### Acknowledgments

We would like to thank all the homeless people who participate in this study by providing their samples and questionnaires. We would also like to thank all the following: the **nurse interweaves and mediators involved in the 'COVID homeless' project**: Maud Landreau, Anne Ranise and Nathalie Vuagniaux, Grâce Inegbeze, Snjezana Huette, Marko Sava, Lisa Hasse, Mathieu Ledu, Alejandro Vernet and Drisse Mekkaoui ; the **Assab network; the following Homeless outreach teams**: ADDAP13, AMPIL, ASUD, Bus 31/32, Equipe Mobile d'Aide (EMA) Saralogisol, Equipe Mobile santé ADJ Marceau, Equipe Mobile Gare et Connexion ADJ Marceau, MARSS-APHM, Nouvelle Aube, Mission Bidonville Médecins du monde, PASS adulte APHM, Réseau Santé Marseille Sud (RSMS); the following **Emergency shelters**: UHU La Madrague-ville, St Louis, Sleep'in (groupe SOS Solidarité), Forbin (Fondation St Jean de Dieu), Marius Macias (AAJT) and the following people involved in providing **Collective accommodation for homeless people**: Marius Macias (AAJT); William Booth (Armée du Salut); Le Marabout, le Mascaret (Habitat Alternatif Social); Foyer Honorat (Hospitalité pour les Femmes); Jane Pannier (Maison de la Jeune Fille); SHAS (Saralogisol) Coco Velten, La Selonnie (groupe SOS Solidarité); Forbin (St Jean de Dieu); Village Club du Soleil; for their work in improving the care management of homeless people in Marseille.

### REFERENCES

- 1 Baggett TP, Gaeta JM. COVID-19 and homelessness: when crises intersect. *Lancet Public Health* Published Online First: 6 February 2021. doi:10.1016/S2468-2667(21)00022-0
- 2 Hwang SW, Burns T. Health interventions for people who are homeless. *Lancet* 2014;**384**:1541–7. doi:10.1016/S0140-6736(14)61133-8
- 3 DIHL. Hébergement d'urgence les hôtels mobilisés pour l'hébergement des personnes sans-abri. gouvernement.fr. 2020. <https://www.gouvernement.fr/hebergement-d-urgence-les-hotels-mobilises-pour-l-hebergement-des-personnes-sans-abri>
- 4 FAP. 26e rapport sur l'état du mal-logement en France 2021. Fondation Abbé Pierre. 2021. <https://www.fondation-abbe-pierre.fr/actualites/26e-rapport-sur-letat-du-mal-logement-en-france-2021> (accessed 3 Mar 2021).
- 5 ALERTE PACA. Ultra-précarité en région PACA, l'avertissement du collectif ALERTE PACA. Uriopss Paca et Corse. 2020. <https://www.uriopss-pacac.fr/actualites/ultra-precarite-en-region-paca-lavertissement-du-collectif-alerte-paca> (accessed 30 Nov 2020).
- 6 Karb R, Samuels E, Vanjani R, *et al.* Homeless Shelter Characteristics and Prevalence of SARS-CoV-2. *WestJEM* 2020;**21**. doi:10.5811/westjem.2020.7.48725
- 7 Roederer T, Mollo B, Vincent C, *et al.* Seroprevalence and risk factors of exposure to COVID-19 in homeless people in Paris, France: a cross-sectional study. *Lancet Public Health* Published Online First: 5 February 2021. doi:10.1016/S2468-2667(21)00001-3
- 8 Bean DJ, Monroe J, Turcinovic J, *et al.* Severe Acute Respiratory Syndrome Coronavirus 2 Reinfection Associates With Unstable Housing and Occurs in the Presence of Antibodies. *Clin Infect Dis* 2022;**75**:e208–15. doi:10.1093/cid/ciab940
- 9 Warszawski J, Bajos N, Meyer L, *et al.* En mai 2020, 4, 5% de la population en France métropolitaine a développé des anticorps contre le SARS-CoV-2. Premiers résultats de l'enquête nationale EpiCov. 2020.
- 10 Baggett TP, Keyes H, Sporn N, *et al.* Prevalence of SARS-CoV-2 Infection in Residents of a Large Homeless Shelter in Boston. *JAMA* Published Online First: 27 April 2020. doi:10.1001/jama.2020.6887
- 11 Mosites E, Parker EM, Clarke KEN, *et al.* Assessment of SARS-CoV-2 Infection Prevalence in Homeless Shelters - Four U.S. Cities, March 27-April 15, 2020. *MMWR Morb Mortal Wkly Rep* 2020;**69**:521–2. doi:10.15585/mmwr.mm6917e1
- 12 Doran KM, Ragins KT, Iacomacci AL, *et al.* The revolving hospital door: hospital readmissions among patients who are homeless. *Med Care* 2013;**51**:767–73. doi:10.1097/MLR.0b013e31829fafbb
- 13 Russolillo A, Moniruzzaman A, Parpouchi M, *et al.* A 10-year retrospective analysis of hospital admissions and length of stay among a cohort of homeless adults in Vancouver, Canada. *BMC Health Serv Res* 2016;**16**:60. doi:10.1186/s12913-016-1316-7

- 1  
2  
3 14 Al-Shakarchi NJ, Evans H, Luchenski SA, *et al*. Cardiovascular disease in homeless versus housed  
4 individuals: a systematic review of observational and interventional studies. *Heart* 2020;**106**:1483–8.  
5 doi:10.1136/heartjnl-2020-316706
- 6 15 Loubière S, Monfardini E, Allaria C, *et al*. Seroprevalence of SARS-CoV-2 Antibodies Among  
7 Homeless People Living Rough, in Shelters and Squats: A Large Population-Based Study in France. 2021.  
8 16 Brunner A, Maurin L. Rapport sur la pauvreté en France, édition 2020-2021. *Observatoire des*  
9 *inégalités* 2020;:104.
- 10 17 ETHOS Typology on Homelessness and Housing Exclusion.  
11 <https://www.feantsa.org/en/toolkit/2005/04/01/ethos-typology-on-homelessness-and-housing-exclusion>  
12 (accessed 15 Mar 2021).
- 13 18 Vauloup-Fellous C, Maylin S, Périllaud-Dubois C, *et al*. Performance of 30 commercial SARS-CoV-2  
14 serology assays in testing symptomatic COVID-19 patients. *Eur J Clin Microbiol Infect Dis* 2021;:1–7.  
15 doi:10.1007/s10096-021-04232-3
- 16 19 Warszawski J, Bajos N, Barlet M, *et al*. A national mixed-mode seroprevalence random population-  
17 based cohort on SARS-CoV-2 epidemic in France: the socio-epidemiological EpiCov study. *Public and Global*  
18 *Health* 2021. doi:10.1101/2021.02.24.21252316
- 19 20 SPF. Taux d'incidence de l'épidémie de COVID-19 (SI-DEP) - data.gouv.fr. 2021./fr/datasets/taux-  
20 d'incidence-de-lepidemie-de-covid-19/ (accessed 5 Mar 2021).
- 21 21 Murhekar MV, Bhatnagar T, Selvaraju S, *et al*. SARS-CoV-2 antibody seroprevalence in India,  
22 August–September, 2020: findings from the second nationwide household serosurvey. *Lancet Glob Health*  
23 2021;**9**:e257–66. doi:10.1016/S2214-109X(20)30544-1
- 24 22 Ralli M, Morrone A, Arcangeli A, *et al*. Asymptomatic patients as a source of transmission of COVID-  
25 19 in homeless shelters. *Int J Infect Dis* 2021;**103**:243–5. doi:10.1016/j.ijid.2020.12.031
- 26 23 Carrat F, Touvier M, Severi G, *et al*. Incidence and risk factors of COVID-19-like symptoms in the  
27 French general population during the lockdown period: a multi-cohort study. *BMC Infect Dis* 2021;**21**.  
28 doi:10.1186/s12879-021-05864-8
- 29 24 Stringhini S, Wisniak A, Piumatti G, *et al*. Seroprevalence of anti-SARS-CoV-2 IgG antibodies in  
30 Geneva, Switzerland (SEROCoV-POP): a population-based study. *The Lancet* 2020;**396**:313–9.  
31 doi:10.1016/S0140-6736(20)31304-0
- 32 25 Dorn A van, Cooney RE, Sabin ML. COVID-19 exacerbating inequalities in the US. *Lancet*  
33 2020;**395**:1243–4. doi:10.1016/S0140-6736(20)30893-X
- 34 26 Bambra C, Riordan R, Ford J, *et al*. The COVID-19 pandemic and health inequalities. *J Epidemiol*  
35 *Community Health* 2020;**74**:964–8. doi:10.1136/jech-2020-214401
- 36 27 Sommer I, Griebler U, Mahlkecht P, *et al*. Socioeconomic inequalities in non-communicable diseases  
37 and their risk factors: an overview of systematic reviews. *BMC Public Health* 2015;**15**:914. doi:10.1186/s12889-  
38 015-2227-y
- 39 28 Anand S, Montez-Rath M, Han J, *et al*. Prevalence of SARS-CoV-2 antibodies in a large nationwide  
40 sample of patients on dialysis in the USA: a cross-sectional study. *Lancet* Published Online First: 25 September  
41 2020. doi:10.1016/S0140-6736(20)32009-2
- 42 29 Aldridge RW, Lewer D, Katikireddi SV, *et al*. Black, Asian and Minority Ethnic groups in England are  
43 at increased risk of death from COVID-19: indirect standardisation of NHS mortality data. *Wellcome Open Res*  
44 2020;**5**:88. doi:10.12688/wellcomeopenres.15922.2
- 45 30 Serota DP, Barocas JA, Springer SA. Infectious Complications of Addiction: A Call for a New  
46 Subspecialty Within Infectious Diseases. *Clin Infect Dis* 2020;**70**:968–72. doi:10.1093/cid/ciz804
- 47 31 Neto MLR, de Souza RI, Quezado RMM, *et al*. When basic supplies are missing, what to do? Specific  
48 demands of the local street population in times of coronavirus - a concern of social psychiatry. *Psychiatry Res*  
49 2020;**288**:112939. doi:10.1016/j.psychres.2020.112939
- 50 32 Mejia-Lancheros C, Lachaud J, O'Campo P, *et al*. Trajectories and mental health-related predictors of  
51 perceived discrimination and stigma among homeless adults with mental illness. *PLoS One* 2020;**15**:e0229385.  
52 doi:10.1371/journal.pone.0229385
- 53 33 Tinland A, Loubière S, Boucekine M, *et al*. Effectiveness of a housing support team intervention with a  
54 recovery-oriented approach on hospital and emergency department use by homeless people with severe mental  
55 illness: a randomised controlled trial. *Epidemiol Psychiatr Sci* 2020;**29**. doi:10.1017/S2045796020000785
- 56 34 Martin C, Andrés P, Bullón A, *et al*. COVID pandemic as an opportunity for improving mental health  
57 treatments of the homeless people. *Int J Soc Psychiatry* Published Online First: 21 August 2020.  
58 doi:10.1177/0020764020950770
- 59 35 Milazzo L, Lai A, Pezzati L, *et al*. Dynamics of the seroprevalence of SARS-CoV-2 antibodies among  
60 healthcare workers at a COVID-19 referral hospital in Milan, Italy. *Occup Environ Med* Published Online First:  
February 2021. doi:10.1136/oemed-2020-107060

- 1  
2  
3 36 Rivett L, Sridhar S, Sparkes D, *et al.* Screening of healthcare workers for SARS-CoV-2 highlights the  
4 role of asymptomatic carriage in COVID-19 transmission. *Elife* 2020;**9**. doi:10.7554/eLife.58728  
5 37 Guan W, Ni Z, Hu Y, *et al.* Clinical Characteristics of Coronavirus Disease 2019 in China. *N Engl J*  
6 *Med* Published Online First: 28 February 2020. doi:10.1056/NEJMoa2002032  
7 38 Cattaruzza MS, Zagà V, Gallus S, *et al.* Tobacco smoking and COVID-19 pandemic: old and new  
8 issues. A summary of the evidence from the scientific literature. *Acta Biomed* 2020;**91**:106–12.  
9 doi:10.23750/abm.v91i2.9698  
10 39 Baggett TP, Chang Y, Singer DE, *et al.* Tobacco-, alcohol-, and drug-attributable deaths and their  
11 contribution to mortality disparities in a cohort of homeless adults in Boston. *Am J Public Health*  
12 2015;**105**:1189–97. doi:10.2105/AJPH.2014.302248  
13 40 Allaria C, Loubière S, Mosnier E, *et al.* “Locked down outside”: Perception of hazard and health  
14 resources in COVID-19 epidemic context among homeless people. *SSM Popul Health* 2021;**15**:100829.  
15 doi:10.1016/j.ssmph.2021.100829  
16 41 Baggett TP, Scott JA, Le MH, *et al.* Clinical Outcomes, Costs, and Cost-effectiveness of Strategies for  
17 Adults Experiencing Sheltered Homelessness During the COVID-19 Pandemic. *JAMA Netw Open*  
18 2020;**3**:e2028195. doi:10.1001/jamanetworkopen.2020.28195  
19 42 MIM. 120 sans-abri relogés dans le Village Club du Soleil à la Belle de Mai. *Made in Marseille*  
20 Published Online First: 2020. [https://madeinmarseille.net/67072-120-personnes-sans-abri-relogees-dans-le-](https://madeinmarseille.net/67072-120-personnes-sans-abri-relogees-dans-le-village-club-du-soleil-a-la-belle-de-mai/)  
21 [village-club-du-soleil-a-la-belle-de-mai/](https://madeinmarseille.net/67072-120-personnes-sans-abri-relogees-dans-le-village-club-du-soleil-a-la-belle-de-mai/)  
22 43 “Locked down outside”: Perception of hazard and health resources in COVID-19 epidemic context  
23 among homeless people. <https://www.ncbi.nlm.nih.gov/pmc/articles/PMC8160278/> (accessed 31 May 2021).  
24 44 Bajos N, Franck J-E, Counil E, *et al.* Social Inequalities and Dynamics of the COVID-19 Epidemic:  
25 Evidence from France. *EPICOV Study, Social Inequalities and Dynamics of the COVID-19 Epidemic: Evidence*  
26 *from France* 2021.  
27 45 Jin Y, Wang M, Zuo Z, *et al.* Diagnostic value and dynamic variance of serum antibody in coronavirus  
28 disease 2019. *Int J Infect Dis* 2020;**94**:49–52. doi:10.1016/j.ijid.2020.03.065  
29 46 Brandstetter S, Roth S, Harner S, *et al.* Symptoms and immunoglobulin development in hospital staff  
30 exposed to a SARS-CoV-2 outbreak. *Pediatr Allergy Immunol* 2020;**31**:841–7. doi:10.1111/pai.13278  
31  
32  
33  
34

## 35 Figures and their legends

### 36 **Figure 1: Seroprevalence rates during the two serological testing campaigns<sup>s</sup> in homeless people cohorts** 37 **and results for the general population from the EpiCov study in Marseille**

38 \*General population seroprevalence rate data come from the EpiCov study in Marseille. \$: Bootstrap resampling  
39 approach with a set of 1,000 samples was used to create confidence intervals, accounting for variability in the  
40 sensitivity and specificity of the serological assay.  
41  
42

### 43 **Figure 2: Risk of SARS-CoV-2 infection by type of housing for homeless participants estimated by the** 44 **Kaplan-Meier method, including 95% CI. Censoring and number of participants at risk at different time** 45 **points are indicated.**

46 Street: people living rough (ETHOS1); Emerg.Shelt.: people living in emergency shelters (ETHOS2); Hostel:  
47 people living in hostels (ETHOS3); Slums: people living in slums or squats (ETHOS8); Trans.Shelt.: people living  
48 in transitional accommodation for the homeless (ETHOS4)  
49

### 50 **Figure 3: Cox multivariable logistic regression analysis of risk factors of SARS-CoV-2 seroprevalence in** 51 **homeless people in Marseille.**

52 Having\_Comorb\_PsyAddic: Psychiatric or addictive comorbidities  
53  
54  
55  
56  
57  
58  
59  
60

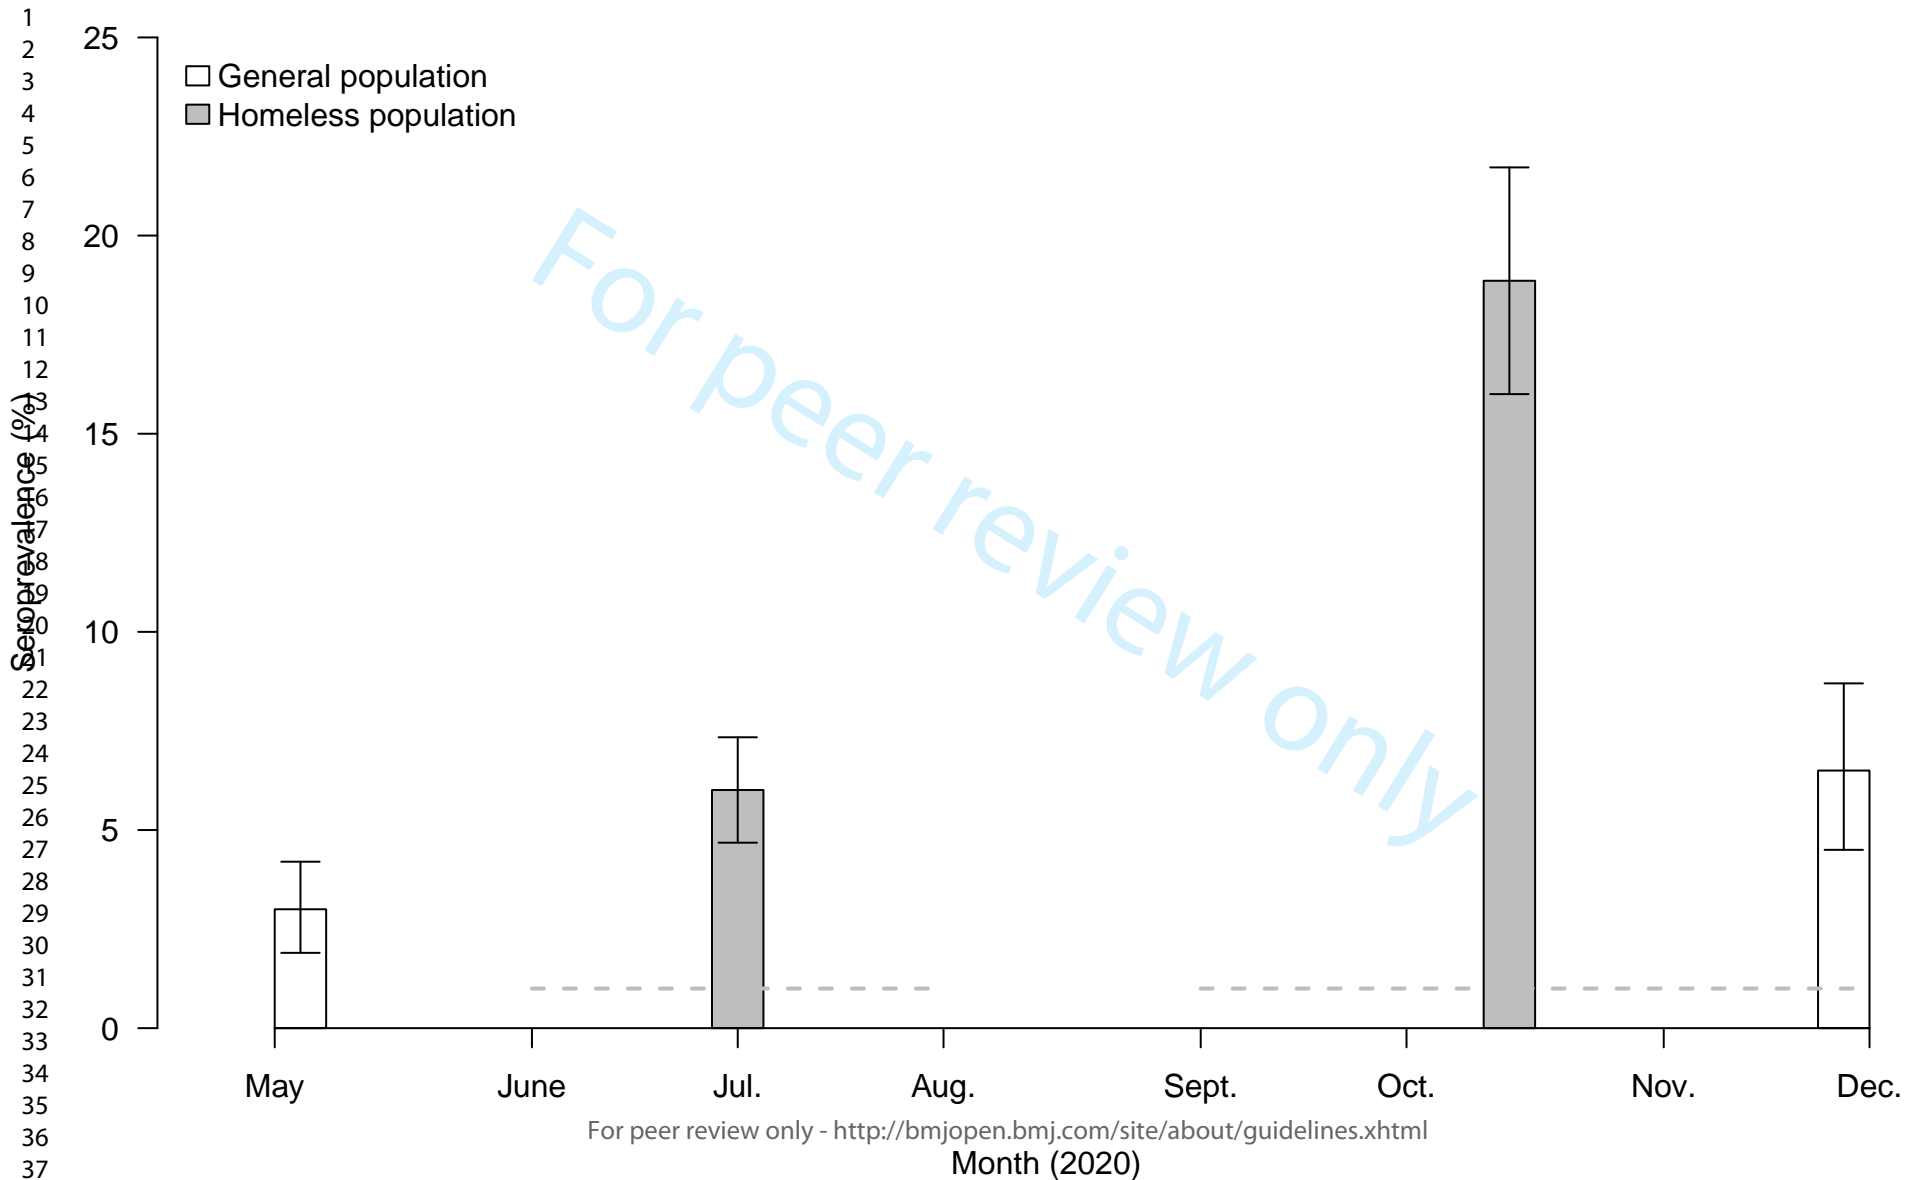

For peer review only



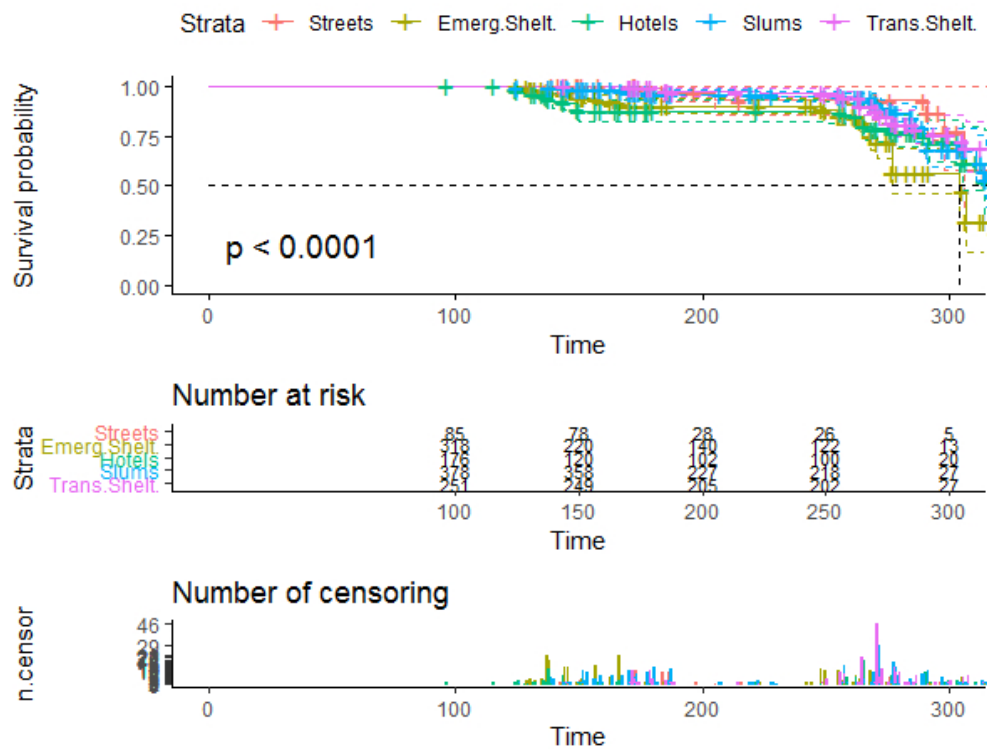

32 Risk of SARS-CoV-2 infection by type of housing for homeless participants estimated by the Kaplan-Meier  
 33 method, including 95% CI. Censoring and number of participants at risk at different time points are  
 34 indicated. Street: people living rough (ETHOS1); Emerg.Shelt.: people living in emergency shelters  
 35 (ETHOS2); Hostel: people living in hostels (ETHOS3); Slums: people living in slums or squats (ETHOS8);  
 36 Trans.Shelt.: people living in transitional accommodation for the homeless (ETHOS4)

37 157x124mm (96 x 96 DPI)

| Variable                           |                  | N   | Hazard ratio |                   | p      |
|------------------------------------|------------------|-----|--------------|-------------------|--------|
| Household_status                   | Isolated adults  | 589 | ■            | Reference         |        |
|                                    | Isolated parent  | 121 | ■            | 1.64 (1.07, 2.52) | 0.024  |
|                                    | Family           | 338 | ■            | 0.78 (0.50, 1.20) | 0.255  |
| Percent_time_shelter               | <=33             | 764 | ■            | Reference         |        |
|                                    | 33 to 66         | 139 | ■            | 1.70 (1.11, 2.62) | 0.016  |
|                                    | >=66             | 145 | ■            | 1.93 (1.18, 3.15) | 0.009  |
| Difficulty_access_hygiene_products | No,never,rarely  | 685 | ■            | Reference         |        |
|                                    | Yes,always,often | 363 | ■            | 0.75 (0.50, 1.12) | 0.160  |
| Having_FinancialResources          | No               | 459 | ■            | Reference         |        |
|                                    | Yes              | 589 | ■            | 0.70 (0.51, 0.97) | 0.033  |
| Tobacco                            | Non smoker       | 452 | ■            | Reference         |        |
|                                    | Smoker           | 596 | ■            | 0.46 (0.32, 0.65) | <0.001 |
| Having_Comorb_PsyAddic             | No               | 784 | ■            | Reference         |        |
|                                    | Yes              | 264 | ■            | 0.52 (0.32, 0.85) | 0.009  |
| Number_Daily_contact               | <=5              | 634 | ■            | Reference         |        |
|                                    | 5-15             | 319 | ■            | 1.84 (1.27, 2.67) | 0.001  |
|                                    | >15              | 95  | ■            | 1.45 (0.69, 3.04) | 0.331  |

Cox multivariable logistic regression analysis of risk factors of SARS-CoV-2 seroprevalence in homeless people in Marseille Having\_Comorb\_PsyAddic: Psychiatric or addictive comorbidities

274x147mm (96 x 96 DPI)

**Supplementary Table 1: Representativeness of the sample**

| Type of accommodation                               | Estimation of the target population* | Source                                                                                              | Number of effectively enrolled people |
|-----------------------------------------------------|--------------------------------------|-----------------------------------------------------------------------------------------------------|---------------------------------------|
| Squats or slums (Ethos 8)                           | 619 to 817                           | NGO (MDM - Doctors of the World) – April 2020                                                       | 363                                   |
| Emergency shelters (Ethos 2)                        | 795                                  | Official administrative data (SIAO) – April 2020                                                    | 358                                   |
| Collective transitional shelters (Ethos 3)          | 634                                  | Official administrative data (SIAO) – April 2020                                                    | 196                                   |
| Hostels mobilized during the covid crisis (Ethos 2) | 893                                  | Official administrative data (Service+) – July 2020                                                 | 197                                   |
| Street (Ethos 1)                                    | 455                                  | First census of homeless people living in streets – January 2022 - No usable source of data in 2020 | 98                                    |

\* *Adult homeless population living in the city of Marseille*. MDM (Médecins du Monde): Doctors of the World NGO; SIAO (Services intégrés de l'accueil et de l'orientation): Integrated reception and guidance services

**STROBE 2007 (v4) Statement—Checklist of items that should be included in reports of *cohort studies***

| Section/Topic                | Item # | Recommendation                                                                                                                                                                       | Reported on page #  |
|------------------------------|--------|--------------------------------------------------------------------------------------------------------------------------------------------------------------------------------------|---------------------|
| <b>Title and abstract</b>    | 1      | (a) Indicate the study's design with a commonly used term in the title or the abstract                                                                                               | 1                   |
|                              |        | (b) Provide in the abstract an informative and balanced summary of what was done and what was found                                                                                  | 2                   |
| <b>Introduction</b>          |        |                                                                                                                                                                                      |                     |
| Background/rationale         | 2      | Explain the scientific background and rationale for the investigation being reported                                                                                                 | 3                   |
| Objectives                   | 3      | State specific objectives, including any prespecified hypotheses                                                                                                                     | 3                   |
| <b>Methods</b>               |        |                                                                                                                                                                                      |                     |
| Study design                 | 4      | Present key elements of study design early in the paper                                                                                                                              | 3                   |
| Setting                      | 5      | Describe the setting, locations, and relevant dates, including periods of recruitment, exposure, follow-up, and data collection                                                      | 3-4                 |
| Participants                 | 6      | (a) Give the eligibility criteria, and the sources and methods of selection of participants. Describe methods of follow-up                                                           | 3                   |
|                              |        | (b) For matched studies, give matching criteria and number of exposed and unexposed                                                                                                  | NA                  |
| Variables                    | 7      | Clearly define all outcomes, exposures, predictors, potential confounders, and effect modifiers. Give diagnostic criteria, if applicable                                             | 4                   |
| Data sources/<br>measurement | 8*     | For each variable of interest, give sources of data and details of methods of assessment (measurement). Describe comparability of assessment methods if there is more than one group | 4                   |
| Bias                         | 9      | Describe any efforts to address potential sources of bias                                                                                                                            | 3-4                 |
| Study size                   | 10     | Explain how the study size was arrived at                                                                                                                                            | 3-4 and suppl. file |
| Quantitative variables       | 11     | Explain how quantitative variables were handled in the analyses. If applicable, describe which groupings were chosen and why                                                         | 3-4                 |
| Statistical methods          | 12     | (a) Describe all statistical methods, including those used to control for confounding                                                                                                | 4                   |
|                              |        | (b) Describe any methods used to examine subgroups and interactions                                                                                                                  | 4                   |
|                              |        | (c) Explain how missing data were addressed                                                                                                                                          | 4                   |
|                              |        | (d) If applicable, explain how loss to follow-up was addressed                                                                                                                       | 4                   |
|                              |        | (e) Describe any sensitivity analyses                                                                                                                                                | 4                   |
| <b>Results</b>               |        |                                                                                                                                                                                      |                     |

|                          |     |                                                                                                                                                                                                                                                                                                                                                                                                               |                     |
|--------------------------|-----|---------------------------------------------------------------------------------------------------------------------------------------------------------------------------------------------------------------------------------------------------------------------------------------------------------------------------------------------------------------------------------------------------------------|---------------------|
| Participants             | 13* | (a) Report numbers of individuals at each stage of study—eg numbers potentially eligible, examined for eligibility, confirmed eligible, included in the study, completing follow-up, and analysed<br>(b) Give reasons for non-participation at each stage<br>(c) Consider use of a flow diagram                                                                                                               | 3-4 and suppl. file |
| Descriptive data         | 14* | (a) Give characteristics of study participants (eg demographic, clinical, social) and information on exposures and potential confounders<br>(b) Indicate number of participants with missing data for each variable of interest<br>(c) Summarise follow-up time (eg, average and total amount)                                                                                                                | 5<br>5<br>5         |
| Outcome data             | 15* | Report numbers of outcome events or summary measures over time                                                                                                                                                                                                                                                                                                                                                | 5                   |
| Main results             | 16  | (a) Give unadjusted estimates and, if applicable, confounder-adjusted estimates and their precision (eg, 95% confidence interval). Make clear which confounders were adjusted for and why they were included<br>(b) Report category boundaries when continuous variables were categorized<br>(c) If relevant, consider translating estimates of relative risk into absolute risk for a meaningful time period | 5-7<br>5-7<br>5-7   |
| Other analyses           | 17  | Report other analyses done—eg analyses of subgroups and interactions, and sensitivity analyses                                                                                                                                                                                                                                                                                                                | 5                   |
| <b>Discussion</b>        |     |                                                                                                                                                                                                                                                                                                                                                                                                               |                     |
| Key results              | 18  | Summarise key results with reference to study objectives                                                                                                                                                                                                                                                                                                                                                      | 8-9                 |
| <b>Limitations</b>       |     |                                                                                                                                                                                                                                                                                                                                                                                                               |                     |
| Interpretation           | 20  | Give a cautious overall interpretation of results considering objectives, limitations, multiplicity of analyses, results from similar studies, and other relevant evidence                                                                                                                                                                                                                                    | 9                   |
| Generalisability         | 21  | Discuss the generalisability (external validity) of the study results                                                                                                                                                                                                                                                                                                                                         | 9                   |
| <b>Other information</b> |     |                                                                                                                                                                                                                                                                                                                                                                                                               |                     |
| Funding                  | 22  | Give the source of funding and the role of the funders for the present study and, if applicable, for the original study on which the present article is based                                                                                                                                                                                                                                                 | 12                  |

\*Give information separately for cases and controls in case-control studies and, if applicable, for exposed and unexposed groups in cohort and cross-sectional studies.

**Note:** An Explanation and Elaboration article discusses each checklist item and gives methodological background and published examples of transparent reporting. The STROBE checklist is best used in conjunction with this article (freely available on the Web sites of PLoS Medicine at <http://www.plosmedicine.org/>, Annals of Internal Medicine at <http://www.annals.org/>, and Epidemiology at <http://www.epidem.com/>). Information on the STROBE Initiative is available at [www.strobe-statement.org](http://www.strobe-statement.org).

# BMJ Open

## Cumulative incidence of SARS-CoV-2 infection within the homeless population: insights from a citywide longitudinal study

|                                 |                                                                                                                                                                                                                                                                                                                                                                                                                                                                                                                                                                                                                                                                                                                                                                                                                                                                                                                                                                                                                                                                                                                                                                                                                                                                                                                                                                                                                                                                                                                                                                                                                                                                     |
|---------------------------------|---------------------------------------------------------------------------------------------------------------------------------------------------------------------------------------------------------------------------------------------------------------------------------------------------------------------------------------------------------------------------------------------------------------------------------------------------------------------------------------------------------------------------------------------------------------------------------------------------------------------------------------------------------------------------------------------------------------------------------------------------------------------------------------------------------------------------------------------------------------------------------------------------------------------------------------------------------------------------------------------------------------------------------------------------------------------------------------------------------------------------------------------------------------------------------------------------------------------------------------------------------------------------------------------------------------------------------------------------------------------------------------------------------------------------------------------------------------------------------------------------------------------------------------------------------------------------------------------------------------------------------------------------------------------|
| Journal:                        | <i>BMJ Open</i>                                                                                                                                                                                                                                                                                                                                                                                                                                                                                                                                                                                                                                                                                                                                                                                                                                                                                                                                                                                                                                                                                                                                                                                                                                                                                                                                                                                                                                                                                                                                                                                                                                                     |
| Manuscript ID                   | bmjopen-2022-065734.R2                                                                                                                                                                                                                                                                                                                                                                                                                                                                                                                                                                                                                                                                                                                                                                                                                                                                                                                                                                                                                                                                                                                                                                                                                                                                                                                                                                                                                                                                                                                                                                                                                                              |
| Article Type:                   | Original research                                                                                                                                                                                                                                                                                                                                                                                                                                                                                                                                                                                                                                                                                                                                                                                                                                                                                                                                                                                                                                                                                                                                                                                                                                                                                                                                                                                                                                                                                                                                                                                                                                                   |
| Date Submitted by the Author:   | 23-Dec-2022                                                                                                                                                                                                                                                                                                                                                                                                                                                                                                                                                                                                                                                                                                                                                                                                                                                                                                                                                                                                                                                                                                                                                                                                                                                                                                                                                                                                                                                                                                                                                                                                                                                         |
| Complete List of Authors:       | <p>MOSNIER, Emilie; AP-HM, Department of Clinical Research and Innovation; Aix-Marseille Universite, 2. Aix Marseille Univ, INSERM, IRD, SESSTIM, Sciences Economiques &amp; Sociales de la Santé &amp; Traitement de l'Information Médicale, Aix Marseille Institute of Public Health ISSPAM loubiere, sandrine; APHM, Department of Clinical Research and Innovation, Support Unit for clinical research and economic evaluation; Aix-Marseille Universite, School of medicine – La Timone Medical Campus, EA 3279: CEReSS</p> <p>Monfardini, Elisabetta; AP-HM, Department of Psychiatry, Assistance Publique</p> <p>Alibert, Agathe; AP-HM, Department of Clinical Research and Innovation</p> <p>Landier, Jordi; IRD, 2. Aix Marseille Univ, INSERM, IRD, SESSTIM, Sciences Economiques &amp; Sociales de la Santé &amp; Traitement de l'Information Médicale, Aix Marseille Institute of Public Health ISSPAM</p> <p>Ninoves, Laetitia; Aix-Marseille Universite, 5. Unité des Virus Émergents (UVE: Aix-Marseille Univ—IRD 190—Inserm 1207—IHU Méditerranée Infection)</p> <p>Bosetti, Thomas; Médecins du Monde France</p> <p>AUQUIER, Pascal; Aix-Marseille University, EA 3279 (Santé Publique : Qualité de Vie et Maladies Chroniques)</p> <p>Mosnier, Marine; Médecins du Monde France</p> <p>Wakap, Stephanie Nguengang; Médecins du Monde France</p> <p>Warszawski, Josiane; CESP, CESP - Public Health; APHP</p> <p>Tinland, Aurelie; Aix-Marseille Universite, School of medicine – La Timone Medical Campus, EA 3279: CEReSS; APHM, Department of Clinical Research and Innovation, Support Unit for clinical research and economic evaluation</p> |
| <b>Primary Subject Heading</b>: | Epidemiology                                                                                                                                                                                                                                                                                                                                                                                                                                                                                                                                                                                                                                                                                                                                                                                                                                                                                                                                                                                                                                                                                                                                                                                                                                                                                                                                                                                                                                                                                                                                                                                                                                                        |
| Secondary Subject Heading:      | Public health, Infectious diseases                                                                                                                                                                                                                                                                                                                                                                                                                                                                                                                                                                                                                                                                                                                                                                                                                                                                                                                                                                                                                                                                                                                                                                                                                                                                                                                                                                                                                                                                                                                                                                                                                                  |
| Keywords:                       | EPIDEMIOLOGY, Public health < INFECTIOUS DISEASES, COVID-19                                                                                                                                                                                                                                                                                                                                                                                                                                                                                                                                                                                                                                                                                                                                                                                                                                                                                                                                                                                                                                                                                                                                                                                                                                                                                                                                                                                                                                                                                                                                                                                                         |
|                                 |                                                                                                                                                                                                                                                                                                                                                                                                                                                                                                                                                                                                                                                                                                                                                                                                                                                                                                                                                                                                                                                                                                                                                                                                                                                                                                                                                                                                                                                                                                                                                                                                                                                                     |

1  
2  
3  
4  
5  
6  
7  
8  
9  
10  
11  
12  
13  
14  
15  
16  
17  
18  
19  
20  
21  
22  
23  
24  
25  
26  
27  
28  
29  
30  
31  
32  
33  
34  
35  
36  
37  
38  
39  
40  
41  
42  
43  
44  
45  
46  
47  
48  
49  
50  
51  
52  
53  
54  
55  
56  
57  
58  
59  
60

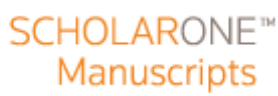

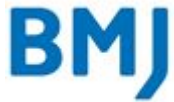

I, the Submitting Author has the right to grant and does grant on behalf of all authors of the Work (as defined in the below author licence), an exclusive licence and/or a non-exclusive licence for contributions from authors who are: i) UK Crown employees; ii) where BMJ has agreed a CC-BY licence shall apply, and/or iii) in accordance with the terms applicable for US Federal Government officers or employees acting as part of their official duties; on a worldwide, perpetual, irrevocable, royalty-free basis to BMJ Publishing Group Ltd ("BMJ") its licensees and where the relevant Journal is co-owned by BMJ to the co-owners of the Journal, to publish the Work in this journal and any other BMJ products and to exploit all rights, as set out in our [licence](#).

The Submitting Author accepts and understands that any supply made under these terms is made by BMJ to the Submitting Author unless you are acting as an employee on behalf of your employer or a postgraduate student of an affiliated institution which is paying any applicable article publishing charge ("APC") for Open Access articles. Where the Submitting Author wishes to make the Work available on an Open Access basis (and intends to pay the relevant APC), the terms of reuse of such Open Access shall be governed by a Creative Commons licence – details of these licences and which [Creative Commons](#) licence will apply to this Work are set out in our licence referred to above.

Other than as permitted in any relevant BMJ Author's Self Archiving Policies, I confirm this Work has not been accepted for publication elsewhere, is not being considered for publication elsewhere and does not duplicate material already published. I confirm all authors consent to publication of this Work and authorise the granting of this licence.



1  
2  
3 **Cumulative incidence of SARS-CoV-2 infection within the homeless population:**  
4 **insights from a citywide longitudinal study**  
5  
6  
7  
8  
9

10 Emilie Mosnier, PhD<sup>1,2\*</sup>; Sandrine Loubière, PhD<sup>1,4</sup>; Elisabetta Monfardini, PhD<sup>3</sup>; Agathe Alibert<sup>1</sup>; Jordi  
11 Landier, PhD<sup>2</sup>; Laetitia Ninoves, PhD<sup>5</sup>; Thomas Bosetti, MD<sup>6</sup>; Pascal Auquier, PhD<sup>4</sup>; Marine Mosnier<sup>6</sup>;  
12 Stephanie Nguengang Wakap, PhD<sup>7</sup>; Josiane Warszawski, PhD<sup>8</sup>; Aurélie Tinland, PhD<sup>3,4</sup>  
13  
14  
15

16 **Authors' Affiliations:**  
17

- 18 1. Department of Clinical Research and Innovation, Support Unit for clinical research and economic  
19 evaluation, Assistance Publique – Hôpitaux de Marseille, F-13385 Marseille, France
  - 20 2. Aix Marseille Univ, INSERM, IRD, SESSTIM, Sciences Economiques & Sociales de la Santé &  
21 Traitement de l'Information Médicale, Aix Marseille Institute of Public Health ISSPAM, F-13385  
22 Marseille, France
  - 23 3. Department of Psychiatry, Assistance Publique – Hôpitaux de Marseille, F-13385 Marseille, France
  - 24 4. Aix-Marseille University, School of medicine – La Timone Medical Campus, EA 3279: CEReSS –  
25 Health Service Research and Quality of Life Center, F-13005 Marseille, France
  - 26 5. Unité des Virus Émergents (UVE: Aix-Marseille Univ—IRD 190—Inserm 1207—IHU Méditerranée  
27 Infection), F-13385 Marseille, France
  - 28 6. Médecins du Monde – Doctors of the World, 13003 Marseille, France
  - 29 7. Médecins du Monde – Doctors of the World, Paris, France
  - 30 8. INSERM CESP U1018, Université Paris-Saclay, 94276 Le Kremlin-Bicêtre, France
- 31  
32  
33  
34  
35  
36  
37  
38

39 **Corresponding author :**

40 \*Dr Emilie Mosnier, MD, PhD, SESSTIM, Sciences Economiques & Sociales de la Santé & Traitement de  
41 l'Information Médicale, 27 boulevard Jean Moulin 13005 Marseille. Email : [emilie.mosnier@gmail.com](mailto:emilie.mosnier@gmail.com). Tel :  
42 +33 4.91.32.46.00  
43  
44

45 **Word count:** 3184  
46  
47  
48  
49  
50  
51  
52  
53  
54  
55  
56  
57  
58  
59  
60

**ABSTRACT**

**Objectives** The aim of this study was to determine the risk factors associated with SARS-CoV-2 infection in a cohort of homeless people using survival analysis. Seroprevalence in the homeless community was also compared to that of the general population.

**Design** Cohort Study

**Setting** Data were collected across two testing sessions, 3 months apart, during which each participant was tested for anti-SARS-CoV-2 antibodies and completed a face-to-face surveys.

**Participants** All homeless adults sleeping rough, in slums or squats, in emergency shelters or transitional accommodation in Marseille were eligible.

**Primary outcome measures** Occurrence of a seroconversion event defined as a biologically confirmed SARS-CoV-2 infection. Local data from a national seroprevalence survey were used for comparison between homeless people and the general population.

**Results** A total of 1249 people were included. SARS-CoV-2 seroprevalence increased from 6.0% [4.7-7.3] during the first session to 18.9% [16.0-21.7] during the second one, compared to 3.0% [1.9-4.2] and 6.5% [4.5-8.7] in the general population. Factors significantly associated with an increased risk of COVID-19 infection were: having stayed in emergency shelters (1.93 [1.18 – 3.15]), being an isolated parent (1.64 [1.07-2.52]) and having contact with more than 5-15 people per day (1.84 [1.27 – 2.67]). By contrast, smoking (0.46 (0.32 – 0.65)), having financial resources (0.70 (0.51 – 0.97)) and psychiatric or addictive comorbidities (0.52 (0.32 – 0.85)) were associated with a lower risk.

**Conclusion** We confirm that homeless people have higher infection rates than the general population, with increased risk in emergency shelters. There is growing evidence that, in addition to usual preventive measures, public policies should pay attention to adapt the type of accommodation and overall approach of precariousness.

**Data availability statement**

The datasets generated and analyzed during the current study are not publicly available due to special authorization to transfer databases given by the CNIL. Upon prior authorization by the CNIL, the dataset would be available from the corresponding author upon reasonable request. Additionally, the study protocol is available upon request. All data requests should be addressed to the corresponding author.

**Strengths and limitations of this study**

- Description of risk factors of SARS-CoV-2 infection in a large study population with high-quality and statistically robust methodology.
- First surveillance data from a cohort of homeless people providing an incidence rate of seroconversion and comparing seroprevalence with the general population at two different time points.
- Large number of people lost to follow-up and difficulties in following a cohort of homeless people who are highly mobile
- Sensitivity of detection by repeated serological tests.

**Keywords**

Homeless population, COVID-19, cohort study, seroprevalence, prevalence, SARS-CoV-2

## INTRODUCTION

The crisis generated by the COVID-19 pandemic suddenly widened the gap in access to healthcare, especially for vulnerable populations [1]. Before the pandemic, homelessness was already associated with higher health inequalities compared to the general population [2].

Public policies had to devise new strategies to limit the impact of the evolving pandemic on healthcare systems and societies. For example, the French Government imposed 2 stringent lockdowns in 2020. These restrictions were accompanied in most cities by a sheltering program for homeless people, with allocation of extra emergency shelters, transitional accommodations and requisitioned hotels [3]. In parallel however, there was a rise of precariousness in France, with an increase in the number of homeless people [4,5]. Studies show that homeless people are at high risk of developing SARS-CoV-2 infection and reinfection due to physical proximity, crowded emergency shelters and unsafe or unhygienic living conditions[6–8]. In this context, data on the spread of the SARS-CoV-2 virus and immunity among the homeless are essential to inform policy stakeholders and to contain epidemic dynamics.

In France, in May 2020, a nationwide study in the general population estimated that seroprevalence ranged from 3.5% (South East of France) to 10.8% (North East of France) [9], emphasizing the need for regionally specific data. This seroprevalence reflected the regional heterogeneity at the beginning of the pandemic. A high prevalence rate of SARS-CoV-2 infection was reported in people living in homeless shelters [7,10,11], which also showed a high rate of severe COVID-19 symptoms, potentially due to a lack of access to the health care and a high prevalence of comorbidities such as lung or heart diseases [12–14]. To our knowledge, there is no representative data of an entire homeless population to describe the dynamics of the prevalence of SARS-CoV-2 infection over time.

The aim of this study was to determine the risk factors associated with SARS-CoV-2 infection in a cohort of homeless people using survival analysis. Seroprevalence in the homeless community was also compared to that of the general population.

## METHODS

### Study Design

The present study was a descriptive and prospective cohort. Study design, participants and sampling were described in a previous study [15]. Each participant receives individualized follow-up and repeated testing at the inclusion and 3 month later. There was no resampling.

### Study Area and Population

The study area was the city of Marseille, the second largest city in France with 889,029 inhabitants, suffering from a high level of poverty [16].

#### Eligible population

Data from the local orientation system for emergency and transitional accommodation (SIAO) and the NGO Doctors of the World estimated that in 2020, at the beginning of the COVID-19 outbreak, there were 2,322 homeless adults living in emergency, transitional shelters or hostels and 619 to 817 living in squats or slums (Supplementary File 1). No point-in-time census was available for people living on the streets in Marseille.

#### Inclusion criteria

In order to focus on the homeless people the furthest from housing, we decided to select those characterized by the greatest residential instability: people sleeping rough, in squats or slums, in stabilization shelters, in emergency shelters or hostels, respectively corresponding to the following categories of the European typology of homelessness (ETHOS): ETHOS 1, 2, 3 and 8 [17].

#### Participant selection

In the absence of a point-in-time count, random sampling was impossible. We set a 2-month inclusion period, during which we systematically offered all homeless people aged over 18 to participate in the study. Recruitment of participants was also facilitated by the “Accès aux Soins des Sans Abris (ASSAb) network” of assistance to homeless people: 18 homeless outreach teams working in streets, hotels, squats or slums, 5 emergency shelters and 10 transitional accommodations.

#### Investigations

Two specific sessions of serological testing were conducted in order to assess seroprevalence. The first session lasted from June 5 to August 5, 2020, and the second from September 11 to December 18, 2020. At each session, each participant was tested using a rapid diagnostic serological test, and completed a face-to-face survey investigating: socio-demographic characteristics; comorbidities; past and current medical history of COVID-19; difficulties in access to care, water, food or hygiene supplies; compliance with the preventive measures (social

1  
2  
3 distancing, wearing a face mask, and hand washing). Questions were asked by trained local interviewers in the  
4 participants' native language to improve comprehension and to minimize the information bias.  
5

### 6 **Community Engagement and Medical Care**

7 Community awareness interventions were conducted during the two testing sessions, to secure the commitment  
8 and participation of a majority of homeless people. Community engagement started by meetings with the  
9 community leaders or mediators but also the healthcare workers and the members of local institutions or NGOs  
10 implicated in health for homeless people with the help of a local network (ASSAB) in charge of coordination with  
11 these different stakeholders. Interviewers were sensitized to the study objectives, interventions and expected role  
12 of the community. A mobile team including an infectious disease specialist, a nurse and a community mediator  
13 followed the positive cases.

### 14 **Field Biological Analysis**

15 We used the rapid serological test "Biosynex COVID-19 BSS<sup>®</sup>", that detects immunoglobulin M (IgM) and G  
16 (IgG) in 10 minutes with high specificity and sensitivity (>95% and 90% respectively) [18].  
17

### 18 **Data Analysis**

19  
20 Descriptive analyses of sociodemographic characteristics were performed using numbers and percentage for  
21 categorical data, or medians and interquartile range (IQR) for quantitative data. The seroprevalence of COVID-19  
22 infection was investigated between February 1, 2020 and December 18, 2020. All the participants were considered  
23 to have a negative serology on February 1, 2020 before the first cases were detected in early March 2020 in  
24 Marseille. In the event of seroconversion, infection was reported as confirmed at the time of serological testing,  
25 with the possibility of overestimating the number of person-days before infection and regardless of the results of  
26 subsequent serological tests. This methodological choice was made in relation to the different predictive variables  
27 also collected at the time of the serological test. To assess seroprevalence rate according to presence or absence of  
28 symptoms, bootstrap resampling approach with a set of 1,000 samples was used to create 95% confidence intervals  
29 (CI) based on IgM/IgG sensitivity and specificity and their 95%CI. Kaplan-Meier methods along with the log rank  
30 test were used to establish statistical differences in seroprevalence rates between types of ETHOS accommodation  
31 [17]. A survival analysis was carried out to address the spread of COVID 19 among the targeted population. The  
32 time (in months) was defined as follows: the starting date was the date of February 01 2020, date at which none  
33 positive cases were registered in Marseille, that is when all participants could be considered to have a COVID19-  
34 negative status. The event was a positive SARS-CoV-2 status, whatever a positive SARS-CoV-2 PCR or a positive  
35 serological test informed the diagnosis. His or her status was considered positive regardless of the results of  
36 subsequent serological tests. For those with a PCR test achieved, the date of the event corresponded to the PCR  
37 date, corrected with the date of the first symptoms when reported. For positive participant with a rapid serological  
38 test, the reported date of the first symptoms was considered. For participant with a positive serological test but  
39 with no history of symptoms, we considered the date of the testing strategy performed by the research team. In  
40 order to take into account in the analysis, in regards to the mobility of the participants, in terms of the place of  
41 residence and the possibility of changes in socio-demographic characteristics, we took the data at the time of the  
42 positive test for SARS CoV2 participants and at the time of the last test for negative patients throughout the follow-  
43 up. No additional corrections were made in absence of any informative data. Participants tested negative at the  
44 first testing wave but being lost to follow up at the second testing wave were censored at the date of the last  
45 collection data. The cut-off date was December 18 2020, precisely 11.2 months after the starting date. A Cox  
46 model was performed using both baseline covariates and time-dependent covariates. Time-dependent covariates  
47 were the following: type of ETHOS accommodation (i.e. street, emergency shelters, hotels, transitional shelter or  
48 squat/slum), type of accommodation (private or shared room/area), number of contacts per day, having financial  
49 resources and having work. We fitted a multivariate Cox model by considering as eligible variables those that were  
50 significant in a univariate analysis at the 5% level, and considering all pairwise interactions. The covariate "number  
51 of contacts per day" was forced into the model as it was considered to be a relevant variable. We tested the  
52 assumption of proportional hazards using Schoenfeld residuals. Then, we used the Stepwise selection function in  
53 R, which starts with an empty model and adds/removes predictors according to AIC criteria. Unadjusted and  
54 adjusted Hazard ratios (HR) and 95 % CI were given.

55 All of the statistical analyses were carried out using R software, and differences with p values of <0.05 were  
56 considered statistically significant.

57 Seroprevalence data of our study were compared with data from a representative sample of the general population  
58 living in Marseille, which were derived from a national seroprevalence survey (EpiCov) [19]. Results of  
59 seroprevalence in the general population were obtained from home self-samples of dried blood spots, in order to  
60 detect IgG antibodies (Euroimmun ELISA-S) [19].

All the confirmed cases of COVID-19 by positive SARS-CoV-2 PCR in Marseille registered from January 1 to December 31, 2020, by the French national monitoring department (SI-DEP) from *Santé Publique France* [20], were used to describe the local incidence rate of COVID-19 infection in cases per person-weeks.

**Patients and public involvement:** Public were involved in conduct (questionnaire were conducted by peer workers) and dissemination plans of this research (the results were presented to the public via photo and sound exhibitions and radio broadcasts in Marseille city).

## RESULTS

During the first session from June 5 to August 5, 2020, 1241 people were included. Median age was 38 years [IQR 22], 70.40% were men (n=874) with 98 (8.1%) of participants living rough, 358 (29.5%) in emergency shelters, 197 (16.2%) in hostels, 196 (16.2%) in transitional shelters, and 363 (29.9%) in squats and slums (Table 1). A total of 30% of the participants in the cohort changed their place of residence during follow-up. Approximately 37% of eligible ETHOS 2, 3 and 8 participants were included in the study (Supplementary File 1). Around half of the participants, 52.2% (n=648/1241), had confirmed or possible risk factors for severe COVID-19 disease, including cancer, obesity, cardiac or pulmonary disease and severe renal insufficiency. In addition, half of the participants (52.0%, n=645) reported active tobacco consumption. A total of 58.1% (n=721) of the participants tested during the first session were also tested at the second session.

| <b>Table 1: Population characteristics (n=1241)</b> |  | <b>n (%) or median [IQR]</b> |
|-----------------------------------------------------|--|------------------------------|
| <b>Baseline characteristics</b>                     |  |                              |
| <b>Gender</b>                                       |  |                              |
| Men                                                 |  | 874 (70.4%)                  |
| Women                                               |  | 367 (29.6%)                  |
| <b>Age, median, years</b>                           |  | 38 [22]                      |
| <b>Age &lt;= 65 years</b>                           |  | 1179 (95.0%)                 |
| <b>French Nationality</b>                           |  | 222 (18.4%)                  |
| <b>Country of Birth</b>                             |  |                              |
| France                                              |  | 234 (18.9%)                  |
| Europe                                              |  | 416 (33.5%)                  |
| Africa                                              |  | 282 (22.7%)                  |
| Other                                               |  | 279 (22.5%)                  |
| Missing                                             |  | 30 (2.4%)                    |
| <b>Educational attainment</b>                       |  |                              |
| None                                                |  | 560 (45.1%)                  |
| Lower secondary                                     |  | 445 (35.9%)                  |
| Upper secondary or vocational                       |  | 122 (9.8%)                   |
| Missing                                             |  | 114 (9.2%)                   |
| <b>Household status</b>                             |  |                              |
| Isolated adult                                      |  | 660 (53.2%)                  |
| Isolated parent                                     |  | 129 (10.4%)                  |
| Family                                              |  | 411 (33.1%)                  |
| Missing                                             |  | 41 (3.3%)                    |
| <b>Health insurance</b>                             |  |                              |
| No                                                  |  | 345 (27.8%)                  |
| Yes                                                 |  | 826 (66.6%)                  |
| Missing                                             |  | 70 (5.6%)                    |
| <b>Financial resources</b>                          |  |                              |
| No                                                  |  | 448 (36.1%)                  |
| Yes                                                 |  | 730 (58.8%)                  |
| Missing                                             |  | 63 (5.1%)                    |
| <b>Working situation <sup>a</sup></b>               |  |                              |
| No                                                  |  | 949 (76.5%)                  |
| Yes                                                 |  | 229 (18.5%)                  |
| Missing                                             |  | 63 (5.1%)                    |
| <b>Total length of homelessness</b>                 |  |                              |
| <= 5 years                                          |  | 775 (62.4%)                  |
| > 5 years                                           |  | 393 (31.7%)                  |
| Missing data                                        |  | 73 (5.9%)                    |
| <b>Typology ETHOS*</b>                              |  |                              |
| ETHOS 1: street                                     |  | 98 (8.1%)                    |

|                                        |             |
|----------------------------------------|-------------|
| ETHOS 2: emergency shelters            | 358 (29.5%) |
| ETHOS2: hotels                         | 197 (16.2%) |
| ETHOS 3: transitional shelters         | 196 (16.2%) |
| ETHOS 8: squats, slums                 | 363 (29.9%) |
| Type of accommodation                  |             |
| Private room or area                   | 524 (42.2%) |
| Shared room or area                    | 648 (52.2%) |
| Missing data                           | 69 (5.6%)   |
| Number of contacts per day             |             |
| <= 5                                   | 714 (58.0%) |
| 5 to 15                                | 410 (33.3%) |
| >15                                    | 107 (8.7%)  |
| Tobacco consumption                    |             |
| No                                     | 480 (38.7%) |
| Yes                                    | 645 (52.0%) |
| Missing                                | 116 (9.3%)  |
| Comorbidity                            |             |
| Psychiatric or addictive comorbidities | 295 (23.8%) |
| Obesity                                | 72 (6.5%)   |
| Diabetes                               | 91 (8.1%)   |
| Chronic Respiratory Pathology          | 99 (9.2%)   |
| Cardiovascular Pathology               | 152 (14.1%) |
| Chronic renal failure with dialysis    | 23 (2.1%)   |
| Cancer                                 | 24 (2.2%)   |

SD: Standard Deviation; IQR: Inter Quartile Range.

a: declared or undeclared employment.

\*ETHOS: European Typology on Homelessness and Housing Exclusion [17]

A total of 74/1241 of participants had positive serology in the first campaign, with 2.5% of positive IgM tests, 5.2% positive IgG tests and 1.7% positive IgM and IgG tests. In the second campaign, 136/721 of participants had positive serology with 8.1% of positive IgM tests, 17.5% positive IgG tests and 6.8% positive IgM and IgG tests. Of the 74 participants with positive serology at the start of the study, 43 were able to be followed up and have a new serology 3 months later. A total of 69.8% (n=30) still had positive serology. Thus, in 30.2% of cases (n=13) there was a rapid negativation of serology.

Seroprevalence was 6.0% (IQR 4.7-7.3) (n=1241) in the first campaign and 18.9% (IQR 16.0-21.7) (n=721) in the second campaign, and had significantly increased ( $p<0.005$ ) (Figure 1. In comparison, seroprevalence in the general population in Marseille (EpiCoV-Marseille) was 3.0% [1.9-4.2] in May to June and 6.5% (CI95% 4.5-8.7) in November to December 2020 and had significantly increased ( $p<0.005$ ) (Figure1).

### Factors Associated with SARS-CoV-2 Infection

A total of 180 participants presented a SARS-CoV-2 seroconversion defined by a positive serology result for SARS-CoV-2 (IgM or IgG). At inclusion (n=74/1241) or as part of the cohort follow-up (n=136/721). Average time of infection from February 1, 2020 was 230 days (IQR 162-277). Figure 2 shows the Kaplan Meier curves according to the participant's type of accommodation. Homeless people living in emergency shelters and hotels had a significantly higher risk of SARS-CoV-2 infection compared to their counterparts over the study follow-up period ( $p<0.001$ ).

Table 2 shows univariate and multivariate analysis of the factors associated with the SARS-CoV-2 seroprevalence. Univariate analysis identified an association between positive serological results and participants coming from Africa (2.51 (1.45 – 4.33)) or those applying physical distancing (1.61 (1.14 – 2.27)). These two variables were not retained in the final model. Difficult access to hygiene products was also associated with lower seroprevalence in univariate analysis (0.72 (0.52 – 0.96)) but not in multivariate analysis. Being an isolated parent (1.64 (1.07 – 2.52)), spending more than 33% (1.70 (1.11 – 2.62)) or 66% (1.93 (1.18 – 3.15)) of time living in an emergency shelter during follow-up, and having between 5 to 15 daily contacts (1.84 (1.27 – 2.67)), were associated with SARS-CoV-2 infection in multivariate analysis. By contrast, having financial resources (1.64 (1.07 – 2.52)), being a smoker at the time of the survey (0.46 (0.32 – 0.65)) and having psychiatric or addictive comorbidities (0.52 (0.32 – 0.85)) were associated with a lower risk of SARS-CoV-2 seroprevalence. Figure 3 summarizes the Cox multivariable regression analysis. Model remains unchanged even by adjusting on age and sex (Supplementary file 2).

Other potential risk factors, such as educational attainment, gender, age, total length of homelessness in the life of participants, wearing a mask, hand washing, difficult access to water or not having health insurance were not associated with SARS-CoV-2 prevalence.

**Table 2: Univariate and multivariable analysis of the seroprevalence of SARS-CoV-2 infection (n=180/1241) between February and December 2020 in homeless people living in Marseille**

| <i>Results</i>                               |                               | Univariate analysis |                          | Multivariate analysis <sup>£</sup> |
|----------------------------------------------|-------------------------------|---------------------|--------------------------|------------------------------------|
|                                              |                               | HR (CI95%)          | p-value                  | Adjusted HR (CI95%)                |
| Gender                                       |                               |                     |                          |                                    |
|                                              | Men                           | ref                 |                          |                                    |
|                                              | Women                         | 0.97 (0.70 - 1.34)  | 0.900                    |                                    |
| Age, years                                   |                               |                     |                          |                                    |
|                                              | ≤65                           | Ref                 |                          |                                    |
|                                              | >65                           | 1.66 (0.99 - 2.77)  | 0.050                    |                                    |
| Country of Birth                             |                               |                     |                          |                                    |
|                                              | France                        | ref                 |                          |                                    |
|                                              | Europe                        | 1.45 (0.83 - 2.55)  | 0.193                    |                                    |
|                                              | Africa                        | 2.51 (1.45 - 4.33)  | <b>0.001<sup>£</sup></b> |                                    |
|                                              | Other                         | 2.80 (1.63 - 4.79)  | <0.001                   |                                    |
| Educational attainment                       |                               |                     |                          |                                    |
|                                              | None                          | ref                 |                          |                                    |
|                                              | Lower secondary               | 1.32 (0.96 - 1.82)  | 0.090                    |                                    |
|                                              | Upper secondary or vocational | 1.14 (0.63 - 2.05)  | 0.670                    |                                    |
| Household status                             |                               |                     |                          |                                    |
|                                              | Isolated adult                | ref                 |                          | ref                                |
|                                              | Isolated parent               | 1.78 (1.18 - 2.67)  | <b>0.006</b>             | <b>1.64 (1.07 - 2.52)</b>          |
|                                              | Family                        | 0.78 (0.55 - 1.11)  | 0.168                    | 0.78 (0.50 - 1.20)                 |
| Health insurance                             |                               |                     |                          |                                    |
|                                              | No                            | Ref                 |                          |                                    |
|                                              | Yes                           | 0.96 (0.69 - 1.34)  | 0.800                    |                                    |
| Having financial resources                   |                               |                     |                          |                                    |
|                                              | No                            | Ref                 |                          | Ref                                |
|                                              | Yes                           | 0.64 (0.47 - 0.86)  | <b>0.003</b>             | <b>0.70 (0.51 - 0.97)</b>          |
| Having work                                  |                               |                     |                          |                                    |
|                                              | No                            | Ref                 |                          |                                    |
|                                              | Yes                           | 0.71 (0.45 - 1.12)  | 0.110                    |                                    |
| Total length of homelessness                 |                               |                     |                          |                                    |
|                                              | ≤ 5 years                     | ref                 |                          |                                    |
|                                              | > 5 years                     | 0.95 (0.69 - 1.30)  | 0.700                    |                                    |
| Percent of time spent in emergency shelters* |                               |                     |                          |                                    |
|                                              | <33%                          | Ref                 |                          | ref                                |
|                                              | 33 to 66%                     | 1.68 (1.15 - 2.46)  | <b>0.007</b>             | <b>1.70 (1.11 - 2.62)</b>          |
|                                              | >66%                          | 2.45 (1.59 - 3.76)  | <b>&lt;0.001</b>         | <b>1.93 (1.18 - 3.15)</b>          |
| Number of daily contacts                     |                               |                     |                          |                                    |
|                                              | ≤5 per day                    | Ref                 |                          | Ref                                |
|                                              | >5 to ≤15 per day             | 1.21 (0.88 - 1.65)  | 0.100 <sup>£</sup>       | <b>1.84 (1.27 - 2.67)</b>          |
|                                              | >15 per day                   | 0.68 (0.33 - 1.40)  | 0.200                    | 1.45 (0.69 - 3.04)                 |
| Wearing mask                                 |                               |                     |                          |                                    |
|                                              | No, somewhat no               | Ref                 |                          |                                    |
|                                              | Yes, somewhat yes             | 1.23 (0.85 - 1.78)  | 0.300                    |                                    |
| Physical distancing                          |                               |                     |                          |                                    |
|                                              | No, somewhat no               | Ref                 |                          |                                    |
|                                              | Yes, somewhat yes             | 1.61 (1.14 - 2.27)  | <b>0.007<sup>£</sup></b> |                                    |
| Hand washing                                 |                               |                     |                          |                                    |
|                                              | No, somewhat no               | ref                 |                          |                                    |
|                                              | Yes, somewhat yes             | 1.43 (0.99 - 2.06)  | 0.060                    |                                    |
| Difficult access to hygiene products         |                               |                     |                          |                                    |
|                                              | No, never, rarely             | Ref                 |                          | ref                                |
|                                              | Yes, always, often            | 0.72 (0.52 - 0.96)  | <b>0.040</b>             | 0.75 (0.50 - 1.12)                 |
| Difficult access to water                    |                               |                     |                          |                                    |
|                                              | No, never, rarely             | Ref                 |                          |                                    |
|                                              | Yes, always, often            | 0.76 (0.54 - 1.09)  | 0.100                    |                                    |
| Difficult access to food                     |                               |                     |                          |                                    |
|                                              | No, never, rarely             | Ref                 |                          |                                    |

|                                      |                    |                    |        |                           |
|--------------------------------------|--------------------|--------------------|--------|---------------------------|
|                                      | Yes, always, often | 0.83 (0.62 – 1.12) | 0.200  |                           |
| Smoking status                       |                    |                    |        |                           |
|                                      | Non smoker         | Ref                |        | ref                       |
|                                      | Smoker             | 0.39 (0.28 – 0.53) | <0.001 | <b>0.46 (0.32 – 0.65)</b> |
| Psychiatric or addictive comorbidity |                    |                    |        |                           |
|                                      | No                 | Ref                |        | ref                       |
|                                      | Yes                | 0.46 (0.30 – 0.69) | <0.001 | <b>0.52 (0.32 – 0.85)</b> |

§: total of participants in the analysis: 1241; missing values exist for some of the independent variables; for example smoking status (n=116), educational attainment (n=114), health insurance (n=70), self-reported financial resources (n=63) or household status (n=41).

\*: Percentage was calculated on the basis of each participant's exposed time until the event or until the end of the follow-up in the absence of an event.

£: We fitted a multivariable model containing all variables that were significant in a univariate analysis at the 10% level. We used the Stepwise selection function in R (a mix between forward and backward selection), which starts with an empty model and adds predictors according to AIC criteria. Accordingly, "Country of birth" and "physical distancing" were considered in the multivariate model and removed. In addition, "number of contacts" was forced into the model as a relevant variable.

### Symptomatology of participants with positive SARS-CoV-2 serological status

Among participants with SARS-CoV-2 infection (positive IgM or IgG or both, n=180), 67.6% reported no symptoms (Table 3). Among participants with symptomatic SARS-CoV-2 infections, the most common symptoms were fever, cough, headache and fatigue. Even if participants with a positive serological status reported Covid-19 syndrome (fever, cough, anosmia, headache notably) significantly more often than participants without serological immunity (Table 3), the frequency of symptoms reported did not appear to be strictly specific to SARS-CoV-2 infection.

**Table 3: Symptoms reported in the last 3 months prior the serological test according to serological status (n=1241)**

|                                          | Negative serological status n (%) | CI95% <sup>s</sup> | Positive serological status n (%) | CI95% <sup>s</sup> | P-value |
|------------------------------------------|-----------------------------------|--------------------|-----------------------------------|--------------------|---------|
| Individuals missing symptom data (n=303) | 302 (24.3%)                       |                    | 1 (0.1%)                          |                    |         |
| Individuals with symptom data (n=938)    | 759 (75.7%)                       |                    | 179 (99.9%)                       |                    |         |
| Asymptomatic patient                     | 656 (86.4%)                       | (84.7 – 91.4)      | 121 (67.6%)                       | (65.8 – 71.5)      | <0.001  |
| Participants with symptoms               | 103 (13.6%)                       | (11.7 – 14.3)      | 58 (32.4%)                        | (30.6 – 34.1)      |         |
|                                          |                                   |                    |                                   |                    |         |
| Fever                                    | 42 (4.0%)                         | (2.1 – 4.1)        | 36 (18.0%)                        | (16.1 – 18.9)      | <0.001  |
| Cough                                    | 38 (3.7%)                         | (1.8 – 3.8)        | 28 (14.0%)                        | (12.1 – 14.6)      | <0.001  |
| Dyspnea                                  | 16 (1.5%)                         | (0.0 – 1.5)        | 8 (4.0%)                          | (2.1 – 4.1)        | 0.040   |
| Headache                                 | 41 (3.9%)                         | (2.0 – 4.0)        | 36 (18.0%)                        | (16.2 – 18.9)      | <0.001  |
| Anosmia                                  | 15 (1.4%)                         | (0.0 – 1.4)        | 21 (10.5%)                        | (8.6 – 10.9)       | <0.001  |
| Rhinitis                                 | 39 (3.7%)                         | (1.8 – 3.8)        | 21 (10.5%)                        | (8.6 – 10.9)       | <0.001  |
| Fatigue                                  | 35 (3.4%)                         | (1.5 – 3.5)        | 38 (19.0%)                        | (17.1 – 20.0)      | <0.001  |
| Diarrhoea                                | 15 (1.4%)                         | (0.0 – 1.4)        | 15 (7.5%)                         | (5.6 – 7.8)        | <0.001  |
| Joint pain                               | 15 (1.4%)                         | (0.0 – 1.4)        | 19 (9.5%)                         | (7.6 – 10.0)       | <0.001  |
| Odynophagia                              | 22 (2.1%)                         | (0.0 – 2.1)        | 14 (7.0%)                         | (5.1 – 7.3)        | <0.001  |
| Chills                                   | 21 (2.0%)                         | (0.0 – 2.0)        | 17 (8.5%)                         | (6.6 – 8.8)        | <0.001  |
| Mottling                                 | 1 (0.1%)                          | (0.0 – 0.1)        | 0 (0%)                            | (0.0 – 0.1)        | 0.999   |
| Skin rash                                | 1 (0.1%)                          | (0.0 – 0.1)        | 3 (1.5%)                          | (0.0 – 1.5)        | 0.014   |
| Conjunctivitis                           | 9 (0.8%)                          | (0.0 – 0.7)        | 8 (4.0%)                          | (2.1 – 4.1)        | 0.002   |
| Other                                    | 5 (0.5%)                          | (0.0 – 0.4)        | 2 (1.0%)                          | (0.0 – 0.9)        | 0.316   |

CI95%: confidence interval at 95%

§: an exact test of a simple null hypothesis about the probability of success in a Bernoulli experiment was performed, with confidence level for the returned confidence interval.



## DISCUSSION

The present study is the first to describe the dynamics of SARS-CoV-2 seroprevalence among a large cohort of 1241 homeless people living in Marseille, France. Analysis of data from homeless participants with positive serology results over time, revealed a high prevalence of asymptomatic infection and significant associations between positive serology and the lack of financial resources, being an isolated parent, having between 5 and 15 daily contacts, and the time spent in emergency shelters. Repeated seroprevalence studies enabled to estimate the cumulative incidence of SARS-CoV-2 infection in both asymptomatic and symptomatic people, offering valuable data to inform public health policy-makers [7,21]. In the general population, asymptomatic individuals represent up to 68% of SARS-CoV-2 infections [7,22] and contribute to the rapid spread of the disease [1]. In our study, the estimated prevalence of SARS-CoV-2 increased from 6.01% [4.68-7.34] in June to August to 18.86% [16.00-21.72] in September to December and remained higher than in the general population. Indeed, a cross-sectional study evaluating the seroprevalence of SARS-CoV-2 antibodies across the general population in Marseille in May and November, 2020, found 3.0% [1.9-4.2] and 6.5% (CI95% 4.5 – 8.7), respectively. The increasing gap in seroprevalence between the general population and the homeless population may be due to a potential breakdown of protective measures for people in the most precarious situations [5]. The available data on homeless people comes from cross-sectional studies, that mainly found high seroprevalence [7,10,11]. However, the testing approach was different and concerned a population selected from one type of accommodation (mainly emergency shelters) and results also depend on the intensity of the local epidemic at the time of the survey. A lower infection rate with increasing age was reported in several population-based serological studies, which is not consistent with our findings [23,24]. We observed no differences, in univariate analysis, in estimated seropositivity for older participants or for participants who had comorbidities. These results suggest that aged homeless people at risk of severe COVID-19 disease may be infected by SARS CoV-2 at the same rate as other adults. The pandemic has played an important role in amplifying health inequalities that already existed [25,26]. Increasing evidence has emerged, highlighting that COVID-19 mortality is higher for those who are socioeconomically deprived. We reported in our findings, in addition to the poorest condition of homelessness, that not having financial resources during the pandemic crisis was also a risk factor of SARS-CoV-2 seroprevalence. The link between socioeconomic status and development of infectious disease is well documented, and the main mechanisms reported to be associated with higher occurrence rates of communicable diseases included poor housing, lack of education, nutritional deficiencies, poor work conditions and hygiene [27].

African homeless immigrants had higher SARS-CoV-2 prevalence rates in our study compared to other nationalities. This is despite the fact that North and Sub-Saharan Africans are grouped together for analysis in our study. These findings were consistent with French, English or US studies which reported higher seroprevalence rates and mortality in black ethnic groups [9,28,29]. The homeless are a heterogeneous population. Even if homeless people already face disparity in health outcomes in the current COVID-19 pandemic, African immigrants are a subgroup at even more risk. Thus, it could be important to generate accessible health information and preventive measures for this subgroup, adapted to their literacy and specific needs.

Our study reported lower SARS-CoV-2 infection rates in participants with mental disorders or substance abuse. This is surprising since substance use disorders have frequently been reported to increase the risk of infectious diseases and mental illness to impact awareness of vulnerability to infection and help-seeking when symptoms of COVID-19 develop [30,31]. Since social contacts are the way in which the infection is spread, this lower seroprevalence could be interpreted as a sign of exclusion of these particularly stigmatized people [32]. It should also be noted that in Marseille there are specific healthcare mobile teams for people suffering from mental disorders and substance abuse [33]. This type of specific program has previously reported positive results in pandemic context [34].

In line with the findings of other studies, we observed a considerable proportion of positive subjects (67.6%) with asymptomatic infection [22,35,36]. Some symptoms (fever, cough, headache or fatigue notably) were significantly associated with positive SARS-CoV-2 serology and should be repeated to people during interventions on prevention and information.

As previously described, smoking prevalence was lower in seropositive SARS-CoV-2 participants in our study [37]. Even if prevalence was lower, smoking was associated with an increased risk of hospitalization and morbidity [38]. In our study, a substantial proportion of participants reported alcohol and tobacco consumption. In homeless populations a large proportion of deaths are therefore substance-attributable [39].

Our study reinforces the negative role of overcrowded types of accommodation for homeless people, which increase SARS-CoV-2 transmission. In the USA and France, emergency shelters and their high population density appear to increase the risk of infection [7,11]. Indeed, the emergency shelters are short term shelters that can accommodate several hundred people in Marseille with common sanitary facilities [40]. Collective transitional shelters are longer term, smaller facilities offering more consistent social work. The first French lockdown was ordered on March 17, 2020, as emergency shelters are already full in normal times, hotels were required. In these hotels, people did not have kitchen facilities and often found themselves in high-density grouping areas, especially

1  
2  
3 at meal times or in the few outdoor spaces available [40]. Shelters should be considered as high-risk environments  
4 and stays there should be limited to the minimum. Providing adequate housing with individual bathroom facilities  
5 could be the most effective strategy for mitigating SARS-CoV-2 transmission in homeless communities, as was  
6 reported in a modeling study and by field healthcare workers [41,42]. Our findings also show an association with  
7 a high prevalence in shelters and hostels, which highlights the limits of individual preventive measures in  
8 transitional collective accommodations. These studies illustrate a good compliance with preventive measures,  
9 notably in collective accommodations, but these are clearly insufficient to limit the spread of infection. Homeless  
10 people in the pandemic must face concurrent risks: the risk of SARS-CoV-2 infection in shelters and collective  
11 accommodation, and the risk of the lack of access to food, water or hygiene products in more insecure housing  
12 conditions [43].

13  
14 Throughout the course of the pandemic, healthcare and housing programs for homeless people have been modified.  
15 However, our results suggest that overcrowded and large emergency shelters or transitional accommodation  
16 including hostels increase the risk of SARS-CoV-2 transmission which pleads to adapt social and public health  
17 infrastructures towards good quality, smaller and semi-private accommodation. Holistic action (food, hygiene and  
18 financial support, health insurance, specific vaccination program...) must also be taken to ensure that the needs of  
19 these individuals are met sufficiently for them to be able to limit viral spread, survive this pandemic and be well  
20 enough equipped to endure the following economic crisis.

21 In addition, our findings highlight two other risk factors linked to socioeconomic inequalities: the lack of financial  
22 resource and being an isolated parent. Furthermore, people with low financial resources or single parents with one  
23 child are potentially more likely to seek outside support which may increase the risk of viral exposure, as it was  
24 previously described for people who have to work outside [44].

### 25 **Strengths and limitations**

26 Our study has number of strengths. Although studies have shown an increased risk of SARS-CoV-2 infection in  
27 homeless people, this is the first surveillance data from a cohort providing an incidence rate of seroconversion and  
28 comparing seroprevalence with the general population at two different time points. Our study described risk factors  
29 of SARS-CoV-2 infection in a large study population with high-quality and statistically robust methodology. Our  
30 findings quantify the excess risk associated with staying in emergency shelters. We also found evidence of SARS-  
31 CoV-2 infection among the most economically vulnerable (lack of financial resources, isolated parent)  
32 highlighting the need for a comprehensive and proactive approach including financial aid, food, water, adequate  
33 housing, mobile healthcare and social assistance for this vulnerable population.

34 Our study has also some limitations. Although it is representative of different homelessness categories (living in  
35 the street, slum, squat, emergency shelter or transitional accommodation), the sample was not randomly enrolled  
36 and therefore our findings may not reflect true seroprevalence, as a potential selection bias cannot be excluded.  
37 Characteristics of study participants upon inclusion and at the end of follow-up were also different, roofless and  
38 younger populations were most frequently lost to follow-up because of a higher mobility. We may also  
39 underestimate seroprevalence and false negative results cannot be excluded [45,46]. Finally, the serological tests  
40 between the general population and the homeless population were not exactly the same. This may account for  
41 some of the observed differences in seroprevalence rates between the two populations.

### 42 **Policy implications and further research**

43 There is growing evidence that, in addition to usual preventive measures, public policies should pay attention to  
44 adapt the type of accommodation and overall approach of precariousness. The findings of this study can guide  
45 European and other governments' disease control planning; to find optimal solutions to house people in less  
46 crowded accommodations, prioritizing individual rather than collective settings and a global approach, thus  
47 restricting transmission. To complete these results, future studies in this vulnerable population should assess the  
48 morbidity and mortality associated with SARS-CoV-2.

### 49 **CONCLUSIONS**

50 The longitudinal cohort of homeless people in Marseille revealed an increase in the seroprevalence of SARS-CoV-  
51 2 infection. This was higher than that observed in the general population and reflects precarious living conditions  
52 and inadequate types of accommodation for this vulnerable population.

### 53 **Acknowledgments**

54  
55 We would like to thank all the homeless people who participate in this study by providing their samples and  
56 questionnaires. We would also like to thank all the following: the **nurse interweaves and mediators involved in  
57 the 'COVID homeless' project**: Maud Landreau, Anne Ranise and Nathalie Vuagniaux, Grâce Inegbeze,

1  
2  
3 Snjezana Huette, Marko Sava, Lisa Hasse, Mathieu Ledu, Alejandro Vernet and Drisse Mekkaoui ; the **Assab**  
4 **network; the following Homeless outreach teams:** ADDAP13, AMPIL, ASUD, Bus 31/32, Equipe Mobile  
5 d'Aide (EMA) Saralogisol, Equipe Mobile santé ADJ Marceau, Equipe Mobile Gare et Connexion ADJ Marceau,  
6 MARSS-APHM, Nouvelle Aube, Mission Bidonville Médecins du monde, PASS adulte APHM, Réseau Santé  
7 Marseille Sud (RSMS); the following **Emergency shelters:** UHU La Madrague-ville, St Louis, Sleep'in (groupe  
8 SOS Solidarité), Forbin (Fondation St Jean de Dieu), Marius Macias (AAJT) and the following people involved  
9 in providing **Collective accommodation for homeless people:** Marius Macias (AAJT); William Booth (Armée  
10 du Salut); Le Marabout, le Mascaret (Habitat Alternatif Social); Foyer Honorat (Hospitalité pour les Femmes);  
11 Jane Pannier (Maison de la Jeune Fille); SHAS (Saralogisol) Coco Velten, La Selonne (groupe SOS Solidarité);  
12 Forbin (St Jean de Dieu); Village Club du Soleil; for their work in improving the care management of homeless  
13 people in Marseille.

14  
15 **Contributorship statement:** First draft of the manuscript: EmM, SL, EIM, AT. Contributed to writing the  
16 manuscript: EmM, SL, EIM, AA, JL, LN, TB, MM, SNW, JW and AT. EM, TB and MM collected the data and  
17 samples. EmM, LN, MM performed biological analysis. Data analysis: EmM, SL, AA, AT. Study design: EmM,  
18 SL, TB, PA, AT. All authors contributed to subsequent drafts and have reviewed and agreed with the content of  
19 the final manuscript.

20  
21 **Competing Interests:** The authors declare that they have no competing interests.

22  
23 **Funding:** This work was supported by the French Directorate of Health care facilities (DGOS) – research grant  
24 PHRC COVID-19 (COVID-homeless-0047)

#### 25 **Data sharing statement**

26 The datasets generated and analyzed during the current study are not publicly available due to special authorization  
27 to transfer databases given by the CNIL. Upon prior authorization by the CNIL, the dataset would be available  
28 from the corresponding author upon reasonable request. Additionally, the study protocol is available upon request.  
29 All data requests should be addressed to the corresponding author.

#### 30 31 **Ethical Approval**

32 All participants provided a written informed consent. The COVIDHomeless study was designed and carried out  
33 in compliance with the Declaration of Helsinki and with legal and regulatory provisions. It was approved by the  
34 ethics committee on May 28, 2020 (CPP IDF VI - number 44-20; ID: 2020-AO1398-31). The database was  
35 anonymized and declared to the French data protection commission (*Commission Nationale de l'Informatique et*  
36 *des Libertés*, CNIL, n°2018172v0).

#### 37 38 39 40 **REFERENCES**

- 41  
42 1 Baggett TP, Gaeta JM. COVID-19 and homelessness: when crises intersect. *Lancet Public Health*  
43 Published Online First: 6 February 2021. doi:10.1016/S2468-2667(21)00022-0  
44 2 Hwang SW, Burns T. Health interventions for people who are homeless. *Lancet* 2014;**384**:1541–7.  
45 doi:10.1016/S0140-6736(14)61133-8  
46 3 DIHL. Hébergement d'urgence les hôtels mobilisés pour l'hébergement des personnes sans-abri.  
47 gouvernement.fr. 2020. [https://www.gouvernement.fr/hebergement-d-urgence-les-hotels-mobilises-pour-l-](https://www.gouvernement.fr/hebergement-d-urgence-les-hotels-mobilises-pour-l-hebergement-des-personnes-sans-abri)  
48 [hebergement-des-personnes-sans-abri](https://www.gouvernement.fr/hebergement-d-urgence-les-hotels-mobilises-pour-l-hebergement-des-personnes-sans-abri)  
49 4 FAP. 26e rapport sur l'état du mal-logement en France 2021. Fondation Abbé Pierre.  
50 2021. <https://www.fondation-abbé-pierre.fr/actualites/26e-rapport-sur-letat-du-mal-logement-en-france-2021>  
51 (accessed 3 Mar 2021).  
52 5 ALERTE PACA. Ultra-précarité en région PACA, l'avertissement du collectif ALERTE PACA.  
53 Uriopss Paca et Corse. 2020. [https://www.uriopss-pacac.fr/actualites/ultra-precarite-en-region-paca-](https://www.uriopss-pacac.fr/actualites/ultra-precarite-en-region-paca-lavertissement-du-collectif-alerte-paca)  
54 [lavertissement-du-collectif-alerte-paca](https://www.uriopss-pacac.fr/actualites/ultra-precarite-en-region-paca-lavertissement-du-collectif-alerte-paca) (accessed 30 Nov 2020).  
55 6 Karb R, Samuels E, Vanjani R, *et al.* Homeless Shelter Characteristics and Prevalence of SARS-CoV-2.  
56 *WestJEM* 2020;**21**. doi:10.5811/westjem.2020.7.48725  
57 7 Roederer T, Mollo B, Vincent C, *et al.* Seroprevalence and risk factors of exposure to COVID-19 in  
58 homeless people in Paris, France: a cross-sectional study. *Lancet Public Health* Published Online First: 5  
59 February 2021. doi:10.1016/S2468-2667(21)00001-3  
60

- 1  
2  
3 8 Bean DJ, Monroe J, Turcinovic J, *et al*. Severe Acute Respiratory Syndrome Coronavirus 2 Reinfection  
4 Associates With Unstable Housing and Occurs in the Presence of Antibodies. *Clin Infect Dis* 2022;**75**:e208–15.  
5 doi:10.1093/cid/ciab940
- 6 9 Warszawski J, Bajos N, Meyer L, *et al*. En mai 2020, 4, 5% de la population en France métropolitaine a  
7 développé des anticorps contre le SARS-CoV-2. Premiers résultats de l'enquête nationale EpiCov. 2020.
- 8 10 Baggett TP, Keyes H, Sporn N, *et al*. Prevalence of SARS-CoV-2 Infection in Residents of a Large  
9 Homeless Shelter in Boston. *JAMA* Published Online First: 27 April 2020. doi:10.1001/jama.2020.6887
- 10 11 Mosites E, Parker EM, Clarke KEN, *et al*. Assessment of SARS-CoV-2 Infection Prevalence in  
11 Homeless Shelters - Four U.S. Cities, March 27-April 15, 2020. *MMWR Morb Mortal Wkly Rep* 2020;**69**:521–2.  
12 doi:10.15585/mmwr.mm6917e1
- 13 12 Doran KM, Ragins KT, Iacomacci AL, *et al*. The revolving hospital door: hospital readmissions among  
14 patients who are homeless. *Med Care* 2013;**51**:767–73. doi:10.1097/MLR.0b013e31829fafbb
- 15 13 Russolillo A, Moniruzzaman A, Parpouchi M, *et al*. A 10-year retrospective analysis of hospital  
16 admissions and length of stay among a cohort of homeless adults in Vancouver, Canada. *BMC Health Serv Res*  
17 2016;**16**:60. doi:10.1186/s12913-016-1316-7
- 18 14 Al-Shakarchi NJ, Evans H, Luchenski SA, *et al*. Cardiovascular disease in homeless versus housed  
19 individuals: a systematic review of observational and interventional studies. *Heart* 2020;**106**:1483–8.  
20 doi:10.1136/heartjnl-2020-316706
- 21 15 Loubière S, Monfardini E, Allaria C, *et al*. Seroprevalence of SARS-CoV-2 Antibodies Among  
22 Homeless People Living Rough, in Shelters and Squats: A Large Population-Based Study in France. 2021.
- 23 16 Brunner A, Maurin L. Rapport sur la pauvreté en France, édition 2020-2021. *Observatoire des*  
24 *inégalités* 2020;:104.
- 25 17 ETHOS Typology on Homelessness and Housing Exclusion.  
26 <https://www.feantsa.org/en/toolkit/2005/04/01/ethos-typology-on-homelessness-and-housing-exclusion>  
(accessed 15 Mar 2021).
- 27 18 Vauloup-Fellous C, Maylin S, Périllaud-Dubois C, *et al*. Performance of 30 commercial SARS-CoV-2  
28 serology assays in testing symptomatic COVID-19 patients. *Eur J Clin Microbiol Infect Dis* 2021;:1–7.  
29 doi:10.1007/s10096-021-04232-3
- 30 19 Warszawski J, Bajos N, Barlet M, *et al*. A national mixed-mode seroprevalence random population-  
31 based cohort on SARS-CoV-2 epidemic in France: the socio-epidemiological EpiCov study. *Public and Global*  
32 *Health* 2021. doi:10.1101/2021.02.24.21252316
- 33 20 SPF. Taux d'incidence de l'épidémie de COVID-19 (SI-DEP) - data.gouv.fr. 2021./fr/datasets/taux-  
34 d'incidence-de-lepidemie-de-covid-19/ (accessed 5 Mar 2021).
- 35 21 Murhekar MV, Bhatnagar T, Selvaraju S, *et al*. SARS-CoV-2 antibody seroprevalence in India,  
36 August–September, 2020: findings from the second nationwide household serosurvey. *Lancet Glob Health*  
37 2021;**9**:e257–66. doi:10.1016/S2214-109X(20)30544-1
- 38 22 Ralli M, Morrone A, Arcangeli A, *et al*. Asymptomatic patients as a source of transmission of COVID-  
39 19 in homeless shelters. *Int J Infect Dis* 2021;**103**:243–5. doi:10.1016/j.ijid.2020.12.031
- 40 23 Carrat F, Touvier M, Severi G, *et al*. Incidence and risk factors of COVID-19-like symptoms in the  
41 French general population during the lockdown period: a multi-cohort study. *BMC Infect Dis* 2021;**21**.  
42 doi:10.1186/s12879-021-05864-8
- 43 24 Stringhini S, Wisniak A, Piumatti G, *et al*. Seroprevalence of anti-SARS-CoV-2 IgG antibodies in  
44 Geneva, Switzerland (SEROCoV-POP): a population-based study. *The Lancet* 2020;**396**:313–9.  
45 doi:10.1016/S0140-6736(20)31304-0
- 46 25 Dorn A van, Cooney RE, Sabin ML. COVID-19 exacerbating inequalities in the US. *Lancet*  
47 2020;**395**:1243–4. doi:10.1016/S0140-6736(20)30893-X
- 48 26 Bambra C, Riordan R, Ford J, *et al*. The COVID-19 pandemic and health inequalities. *J Epidemiol*  
49 *Community Health* 2020;**74**:964–8. doi:10.1136/jech-2020-214401
- 50 27 Sommer I, Griebler U, Mahlknecht P, *et al*. Socioeconomic inequalities in non-communicable diseases  
51 and their risk factors: an overview of systematic reviews. *BMC Public Health* 2015;**15**:914. doi:10.1186/s12889-  
52 015-2227-y
- 53 28 Anand S, Montez-Rath M, Han J, *et al*. Prevalence of SARS-CoV-2 antibodies in a large nationwide  
54 sample of patients on dialysis in the USA: a cross-sectional study. *Lancet* Published Online First: 25 September  
55 2020. doi:10.1016/S0140-6736(20)32009-2
- 56 29 Aldridge RW, Lewer D, Katikireddi SV, *et al*. Black, Asian and Minority Ethnic groups in England are  
57 at increased risk of death from COVID-19: indirect standardisation of NHS mortality data. *Wellcome Open Res*  
58 2020;**5**:88. doi:10.12688/wellcomeopenres.15922.2
- 59 30 Serota DP, Barocas JA, Springer SA. Infectious Complications of Addiction: A Call for a New  
60 Subspecialty Within Infectious Diseases. *Clin Infect Dis* 2020;**70**:968–72. doi:10.1093/cid/ciz804

- 31 Neto MLR, de Souza RI, Quezado RMM, *et al.* When basic supplies are missing, what to do? Specific demands of the local street population in times of coronavirus - a concern of social psychiatry. *Psychiatry Res* 2020;**288**:112939. doi:10.1016/j.psychres.2020.112939
- 32 Mejia-Lancheros C, Lachaud J, O'Campo P, *et al.* Trajectories and mental health-related predictors of perceived discrimination and stigma among homeless adults with mental illness. *PLoS One* 2020;**15**:e0229385. doi:10.1371/journal.pone.0229385
- 33 Tinland A, Loubière S, Boucekine M, *et al.* Effectiveness of a housing support team intervention with a recovery-oriented approach on hospital and emergency department use by homeless people with severe mental illness: a randomised controlled trial. *Epidemiol Psychiatr Sci* 2020;**29**. doi:10.1017/S2045796020000785
- 34 Martin C, Andrés P, Bullón A, *et al.* COVID pandemic as an opportunity for improving mental health treatments of the homeless people. *Int J Soc Psychiatry* Published Online First: 21 August 2020. doi:10.1177/0020764020950770
- 35 Milazzo L, Lai A, Pezzati L, *et al.* Dynamics of the seroprevalence of SARS-CoV-2 antibodies among healthcare workers at a COVID-19 referral hospital in Milan, Italy. *Occup Environ Med* Published Online First: February 2021. doi:10.1136/oemed-2020-107060
- 36 Rivett L, Sridhar S, Sparkes D, *et al.* Screening of healthcare workers for SARS-CoV-2 highlights the role of asymptomatic carriage in COVID-19 transmission. *Elife* 2020;**9**. doi:10.7554/eLife.58728
- 37 Guan W, Ni Z, Hu Y, *et al.* Clinical Characteristics of Coronavirus Disease 2019 in China. *N Engl J Med* Published Online First: 28 February 2020. doi:10.1056/NEJMoa2002032
- 38 Cattaruzza MS, Zagà V, Gallus S, *et al.* Tobacco smoking and COVID-19 pandemic: old and new issues. A summary of the evidence from the scientific literature. *Acta Biomed* 2020;**91**:106–12. doi:10.23750/abm.v91i2.9698
- 39 Baggett TP, Chang Y, Singer DE, *et al.* Tobacco-, alcohol-, and drug-attributable deaths and their contribution to mortality disparities in a cohort of homeless adults in Boston. *Am J Public Health* 2015;**105**:1189–97. doi:10.2105/AJPH.2014.302248
- 40 Allaria C, Loubière S, Mosnier E, *et al.* “Locked down outside”: Perception of hazard and health resources in COVID-19 epidemic context among homeless people. *SSM Popul Health* 2021;**15**:100829. doi:10.1016/j.ssmph.2021.100829
- 41 Baggett TP, Scott JA, Le MH, *et al.* Clinical Outcomes, Costs, and Cost-effectiveness of Strategies for Adults Experiencing Sheltered Homelessness During the COVID-19 Pandemic. *JAMA Netw Open* 2020;**3**:e2028195. doi:10.1001/jamanetworkopen.2020.28195
- 42 MIM. 120 sans-abri relogés dans le Village Club du Soleil à la Belle de Mai. *Made in Marseille* Published Online First: 2020. <https://madeinmarseille.net/67072-120-personnes-sans-abri-relogees-dans-le-village-club-du-soleil-a-la-belle-de-mai/>
- 43 “Locked down outside”: Perception of hazard and health resources in COVID-19 epidemic context among homeless people. <https://www.ncbi.nlm.nih.gov/pmc/articles/PMC8160278/> (accessed 31 May 2021).
- 44 Bajos N, Franck J-E, Counil E, *et al.* Social Inequalities and Dynamics of the COVID-19 Epidemic: Evidence from France. *EPICOV Study, Social Inequalities and Dynamics of the COVID-19 Epidemic: Evidence from France* 2021.
- 45 Jin Y, Wang M, Zuo Z, *et al.* Diagnostic value and dynamic variance of serum antibody in coronavirus disease 2019. *Int J Infect Dis* 2020;**94**:49–52. doi:10.1016/j.ijid.2020.03.065
- 46 Brandstetter S, Roth S, Harner S, *et al.* Symptoms and immunoglobulin development in hospital staff exposed to a SARS-CoV-2 outbreak. *Pediatr Allergy Immunol* 2020;**31**:841–7. doi:10.1111/pai.13278

#### Figure legend/caption

#### Figure 1: Seroprevalence rates during the two serological testing campaigns<sup>s</sup> in homeless people cohorts and results for the general population from the EpiCov study in Marseille.

\*General population seroprevalence rate data come from the EpiCov study in Marseille. †: Bootstrap resampling approach with a set of 1,000 samples was used to create confidence intervals, accounting for variability in the sensitivity and specificity of the serological assay.

#### Figure 2: Risk of SARS-CoV-2 infection by type of housing for homeless participants estimated by the Kaplan-Meier method, including 95% CI. Censoring and number of participants at risk at different time points are indicated.

1  
2  
3 Street: people living rough (ETHOS1); Emerg.Shelt.: people living in emergency shelters (ETHOS2); Hostel:  
4 people living in hostels (ETHOS3); Slums: people living in slums or squats (ETHOS8); Trans.Shelt.: people living  
5 in transitional accommodation for the homeless (ETHOS4)  
6  
7

8 **Figure 3: Cox multivariable logistic regression analysis of risk factors of SARS-CoV-2 seroprevalence in**  
9 **homeless people in Marseille**

10 Having\_Comorb\_PsyAddic: Psychiatric or addictive comorbidities  
11  
12

13 **Supplementary File 1: Representativeness of the sample**

14 \* *Adult homeless population living in the city of Marseille.* MDM (Médecins du Monde): Doctors of the World  
15 NGO; SIAO (Services intégrés de l'accueil et de l'orientation): Integrated reception and guidance services  
16

17 **Supplementary File 2: Cox multivariable logistic regression analysis of risk factors of SARS-CoV-2**  
18 **seroprevalence in homeless people in Marseille adjusted on age and sex**

19 Having\_Comorb\_PsyAddic: Psychiatric or addictive comorbidities  
20  
21  
22  
23  
24  
25  
26  
27  
28  
29  
30  
31  
32  
33  
34  
35  
36  
37  
38  
39  
40  
41  
42  
43  
44  
45  
46  
47  
48  
49  
50  
51  
52  
53  
54  
55  
56  
57  
58  
59  
60

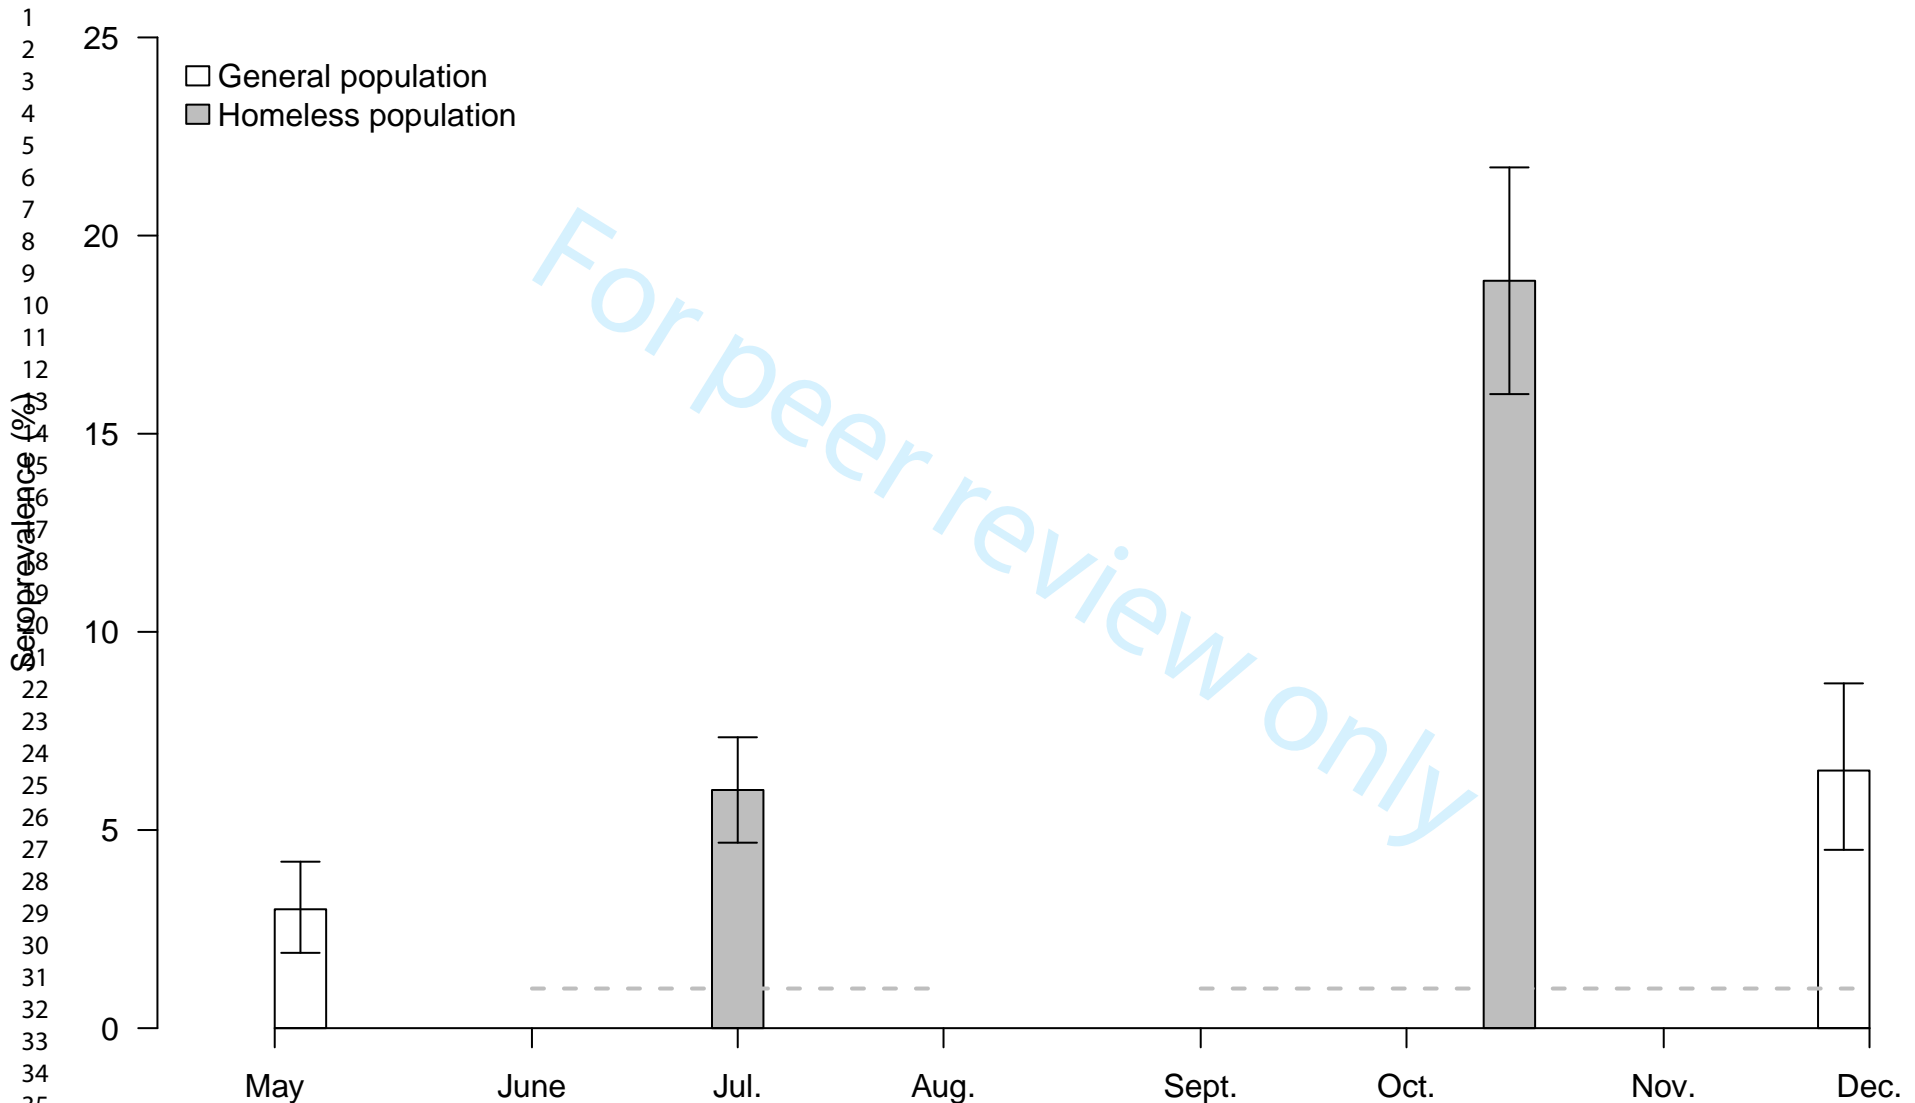

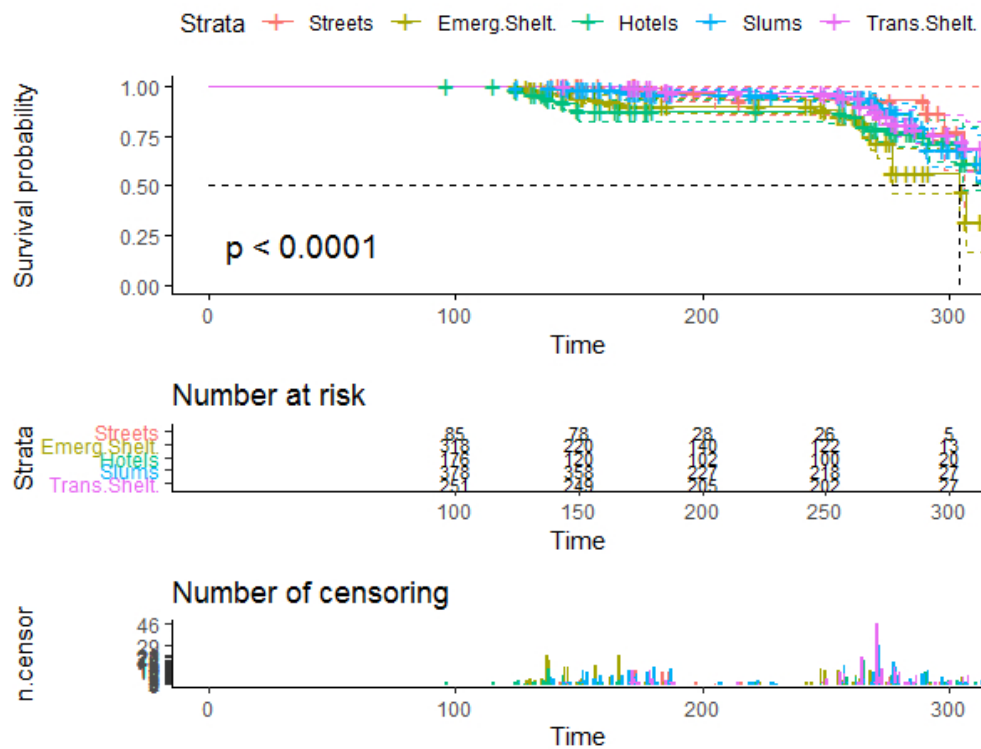

Risk of SARS-CoV-2 infection by type of housing for homeless participants estimated by the Kaplan-Meier method, including 95% CI. Censoring and number of participants at risk at different time points are indicated. Street: people living rough (ETHOS1); Emerg.Shelt.: people living in emergency shelters (ETHOS2); Hostel: people living in hostels (ETHOS3); Slums: people living in slums or squats (ETHOS8); Trans.Shelt.: people living in transitional accommodation for the homeless (ETHOS4)

157x124mm (96 x 96 DPI)



| Variable                           |                  | N   | Hazard ratio |                   | p      |
|------------------------------------|------------------|-----|--------------|-------------------|--------|
| Household_status                   | Isolated adults  | 589 | ■            | Reference         |        |
|                                    | Isolated parent  | 121 | ■            | 1.64 (1.07, 2.52) | 0.024  |
|                                    | Family           | 338 | ■            | 0.78 (0.50, 1.20) | 0.255  |
| Percent_time_shelter               | <=33             | 764 | ■            | Reference         |        |
|                                    | 33 to 66         | 139 | ■            | 1.70 (1.11, 2.62) | 0.016  |
|                                    | >=66             | 145 | ■            | 1.93 (1.18, 3.15) | 0.009  |
| Difficulty_access_hygiene_products | No,never,rarely  | 685 | ■            | Reference         |        |
|                                    | Yes,always,often | 363 | ■            | 0.75 (0.50, 1.12) | 0.160  |
| Having_FinancialResources          | No               | 459 | ■            | Reference         |        |
|                                    | Yes              | 589 | ■            | 0.70 (0.51, 0.97) | 0.033  |
| Tobacco                            | Non smoker       | 452 | ■            | Reference         |        |
|                                    | Smoker           | 596 | ■            | 0.46 (0.32, 0.65) | <0.001 |
| Having_Comorb_PsyAddic             | No               | 784 | ■            | Reference         |        |
|                                    | Yes              | 264 | ■            | 0.52 (0.32, 0.85) | 0.009  |
| Number_Daily_contact               | <=5              | 634 | ■            | Reference         |        |
|                                    | 5-15             | 319 | ■            | 1.84 (1.27, 2.67) | 0.001  |
|                                    | >15              | 95  | ■            | 1.45 (0.69, 3.04) | 0.331  |

Cox multivariable logistic regression analysis of risk factors of SARS-CoV-2 seroprevalence in homeless people in Marseille Having\_Comorb\_PsyAddic: Psychiatric or addictive comorbidities

274x147mm (96 x 96 DPI)

| <b>Supplementary Table 1: Representativeness of the sample</b> |                                             |                                                     |                                              |
|----------------------------------------------------------------|---------------------------------------------|-----------------------------------------------------|----------------------------------------------|
| <b>Type of accommodation</b>                                   | <b>Estimation of the target population*</b> | <b>Source</b>                                       | <b>Number of effectively enrolled people</b> |
| Squats or slums (Ethos 8)                                      | 619 to 817                                  | NGO (MDM - Doctors of the World) – April 2020       | 363                                          |
| Emergency shelters (Ethos 2)                                   | 795                                         | Official administrative data (SIAO) – April 2020    | 358                                          |
| Collective transitional shelters (Ethos 3)                     | 634                                         | Official administrative data (SIAO) – April 2020    | 196                                          |
| Hostels mobilized during the covid crisis (Ethos 2)            | 893                                         | Official administrative data (Service+) – July 2020 | 197                                          |
| Street (Ethos 1)                                               | ?                                           | No usable source of data                            | 98                                           |

\* *Adult homeless population living in the city of Marseille.* MDM (Médecins du Monde): Doctors of the World NGO; SIAO (Services intégrés de l'accueil et de l'orientation): Integrated reception and guidance services

1  
2  
3  
4  
5  
6  
7  
8  
9  
10  
11  
12  
13  
14  
15  
16  
17  
18  
19  
20  
21  
22  
23  
24  
25  
26  
27  
28  
29  
30  
31  
32  
33  
34  
35  
36  
37  
38  
39  
40  
41  
42  
43  
44  
45  
46  
47  
48  
49  
50  
51  
52  
53  
54  
55  
56  
57  
58  
59  
60

| Variable                        | N    | Hazard ratio | p                        |
|---------------------------------|------|--------------|--------------------------|
| <b>Sex</b>                      | 1048 |              | 1.12 (0.75, 1.68) 0.576  |
| <b>Age</b>                      | 1048 |              | 1.21 (0.69, 2.13) 0.503  |
| <b>Household_status</b>         |      |              |                          |
| Isolated adults                 | 589  |              | Reference                |
| Isolated parent                 | 121  |              | 1.62 (1.05, 2.49) 0.028  |
| Family                          | 338  |              | 0.75 (0.48, 1.17) 0.207  |
| <b>Percent_time_shelter</b>     |      |              |                          |
| <=33                            | 764  |              | Reference                |
| >=66                            | 145  |              | 1.90 (1.13, 3.18) 0.015  |
| 33 to 66                        | 139  |              | 1.73 (1.11, 2.68) 0.015  |
| <b>Difficultyaccess_hygiene</b> |      |              |                          |
| No,never,rarely                 | 685  |              | Reference                |
| Yes,always,often                | 363  |              | 0.74 (0.50, 1.12) 0.154  |
| <b>Have_FinancialResource</b>   |      |              |                          |
| No                              | 459  |              | Reference                |
| Yes                             | 589  |              | 0.71 (0.51, 0.98) 0.037  |
| <b>Tobacco</b>                  |      |              |                          |
| Non smoker                      | 452  |              | Reference                |
| Smoker                          | 596  |              | 0.47 (0.32, 0.67) <0.001 |
| <b>Have_Comorb_PsyAddic</b>     |      |              |                          |
| No                              | 784  |              | Reference                |
| Yes                             | 264  |              | 0.52 (0.32, 0.84) 0.008  |
| <b>Number_Daily_contact</b>     |      |              |                          |
| <=5                             | 634  |              | Reference                |
| >15                             | 95   |              | 1.47 (0.70, 3.09) 0.311  |
| 5-15                            | 319  |              | 1.86 (1.28, 2.70) 0.001  |

0.5 1 2

**STROBE 2007 (v4) Statement—Checklist of items that should be included in reports of *cohort studies***

| Section/Topic                | Item # | Recommendation                                                                                                                                                                       | Reported on page #  |
|------------------------------|--------|--------------------------------------------------------------------------------------------------------------------------------------------------------------------------------------|---------------------|
| <b>Title and abstract</b>    | 1      | (a) Indicate the study's design with a commonly used term in the title or the abstract                                                                                               | 1                   |
|                              |        | (b) Provide in the abstract an informative and balanced summary of what was done and what was found                                                                                  | 2                   |
| <b>Introduction</b>          |        |                                                                                                                                                                                      |                     |
| Background/rationale         | 2      | Explain the scientific background and rationale for the investigation being reported                                                                                                 | 3                   |
| Objectives                   | 3      | State specific objectives, including any prespecified hypotheses                                                                                                                     | 3                   |
| <b>Methods</b>               |        |                                                                                                                                                                                      |                     |
| Study design                 | 4      | Present key elements of study design early in the paper                                                                                                                              | 3                   |
| Setting                      | 5      | Describe the setting, locations, and relevant dates, including periods of recruitment, exposure, follow-up, and data collection                                                      | 3-4                 |
| Participants                 | 6      | (a) Give the eligibility criteria, and the sources and methods of selection of participants. Describe methods of follow-up                                                           | 3                   |
|                              |        | (b) For matched studies, give matching criteria and number of exposed and unexposed                                                                                                  | NA                  |
| Variables                    | 7      | Clearly define all outcomes, exposures, predictors, potential confounders, and effect modifiers. Give diagnostic criteria, if applicable                                             | 4                   |
| Data sources/<br>measurement | 8*     | For each variable of interest, give sources of data and details of methods of assessment (measurement). Describe comparability of assessment methods if there is more than one group | 4                   |
| Bias                         | 9      | Describe any efforts to address potential sources of bias                                                                                                                            | 3-4                 |
| Study size                   | 10     | Explain how the study size was arrived at                                                                                                                                            | 3-4 and suppl. file |
| Quantitative variables       | 11     | Explain how quantitative variables were handled in the analyses. If applicable, describe which groupings were chosen and why                                                         | 3-4                 |
| Statistical methods          | 12     | (a) Describe all statistical methods, including those used to control for confounding                                                                                                | 4                   |
|                              |        | (b) Describe any methods used to examine subgroups and interactions                                                                                                                  | 4                   |
|                              |        | (c) Explain how missing data were addressed                                                                                                                                          | 4                   |
|                              |        | (d) If applicable, explain how loss to follow-up was addressed                                                                                                                       | 4                   |
|                              |        | (e) Describe any sensitivity analyses                                                                                                                                                | 4                   |
| <b>Results</b>               |        |                                                                                                                                                                                      |                     |

|                          |     |                                                                                                                                                                                                                                                                                                                                                                                                               |                     |
|--------------------------|-----|---------------------------------------------------------------------------------------------------------------------------------------------------------------------------------------------------------------------------------------------------------------------------------------------------------------------------------------------------------------------------------------------------------------|---------------------|
| Participants             | 13* | (a) Report numbers of individuals at each stage of study—eg numbers potentially eligible, examined for eligibility, confirmed eligible, included in the study, completing follow-up, and analysed<br>(b) Give reasons for non-participation at each stage<br>(c) Consider use of a flow diagram                                                                                                               | 3-4 and suppl. file |
| Descriptive data         | 14* | (a) Give characteristics of study participants (eg demographic, clinical, social) and information on exposures and potential confounders<br>(b) Indicate number of participants with missing data for each variable of interest<br>(c) Summarise follow-up time (eg, average and total amount)                                                                                                                | 5<br>5<br>5         |
| Outcome data             | 15* | Report numbers of outcome events or summary measures over time                                                                                                                                                                                                                                                                                                                                                | 5                   |
| Main results             | 16  | (a) Give unadjusted estimates and, if applicable, confounder-adjusted estimates and their precision (eg, 95% confidence interval). Make clear which confounders were adjusted for and why they were included<br>(b) Report category boundaries when continuous variables were categorized<br>(c) If relevant, consider translating estimates of relative risk into absolute risk for a meaningful time period | 5-7<br>5-7<br>5-7   |
| Other analyses           | 17  | Report other analyses done—eg analyses of subgroups and interactions, and sensitivity analyses                                                                                                                                                                                                                                                                                                                | 5                   |
| <b>Discussion</b>        |     |                                                                                                                                                                                                                                                                                                                                                                                                               |                     |
| Key results              | 18  | Summarise key results with reference to study objectives                                                                                                                                                                                                                                                                                                                                                      | 8-9                 |
| <b>Limitations</b>       |     |                                                                                                                                                                                                                                                                                                                                                                                                               |                     |
| Interpretation           | 20  | Give a cautious overall interpretation of results considering objectives, limitations, multiplicity of analyses, results from similar studies, and other relevant evidence                                                                                                                                                                                                                                    | 9                   |
| Generalisability         | 21  | Discuss the generalisability (external validity) of the study results                                                                                                                                                                                                                                                                                                                                         | 9                   |
| <b>Other information</b> |     |                                                                                                                                                                                                                                                                                                                                                                                                               |                     |
| Funding                  | 22  | Give the source of funding and the role of the funders for the present study and, if applicable, for the original study on which the present article is based                                                                                                                                                                                                                                                 | 12                  |

\*Give information separately for cases and controls in case-control studies and, if applicable, for exposed and unexposed groups in cohort and cross-sectional studies.

**Note:** An Explanation and Elaboration article discusses each checklist item and gives methodological background and published examples of transparent reporting. The STROBE checklist is best used in conjunction with this article (freely available on the Web sites of PLoS Medicine at <http://www.plosmedicine.org/>, Annals of Internal Medicine at <http://www.annals.org/>, and Epidemiology at <http://www.epidem.com/>). Information on the STROBE Initiative is available at [www.strobe-statement.org](http://www.strobe-statement.org).
