# Supplementary material for: Cumulative incidence of SARS-CoV-2 infection within the homeless population: insights from a city-wide longitudinal study
Source: PubMed Central journal article supplement — BMJ Open. 2023 Feb 23;13(2):e065734. doi: 10.1136/bmjopen-2022-065734 (PMC9950589; doi:10.1136/bmjopen-2022-065734), 2023-02-23
Supplement: bmjopen-2022-065734supp001.pdf [file bmjopen-2022-065734supp001.pdf]

| Type of accommodation                               | Estimation of the target population* | Source                                              | Number of effectively enrolled people |
|-----------------------------------------------------|--------------------------------------|-----------------------------------------------------|---------------------------------------|
| Squats or slums (Ethos 8)                           | 619 to 817                           | NGO (MDM - Doctors of the World) – April 2020       | 363                                   |
| Emergency shelters (Ethos 2)                        | 795                                  | Official administrative data (SIAO) – April 2020    | 358                                   |
| Collective transitional shelters (Ethos 3)          | 634                                  | Official administrative data (SIAO) – April 2020    | 196                                   |
| Hostels mobilized during the covid crisis (Ethos 2) | 893                                  | Official administrative data (Service+) – July 2020 | 197                                   |
| Street (Ethos 1)                                    | ?                                    | No usable source of data                            | 98                                    |

\* *Adult homeless population living in the city of Marseille*. MDM (Médecins du Monde): Doctors of the World NGO; SIAO (Services intégrés de l'accueil et de l'orientation): Integrated reception and guidance services
