# Supplementary material for: Cumulative incidence of SARS-CoV-2 infection within the homeless population: insights from a city-wide longitudinal study
Source: PubMed Central journal article supplement — BMJ Open. 2023 Feb 23;13(2):e065734. doi: 10.1136/bmjopen-2022-065734 (PMC9950589; doi:10.1136/bmjopen-2022-065734), 2023-02-23
Supplement: bmjopen-2022-065734supp002.pdf [file bmjopen-2022-065734supp002.pdf]

| Variable                        |                  | N    | Hazard ratio |                   | p      |
|---------------------------------|------------------|------|--------------|-------------------|--------|
| <b>Sex</b>                      |                  | 1048 |              | 1.12 (0.75, 1.68) | 0.576  |
| <b>Age</b>                      |                  | 1048 |              | 1.21 (0.69, 2.13) | 0.503  |
| <b>Household_status</b>         | Isolated adults  | 589  |              | Reference         |        |
|                                 | Isolated parent  | 121  |              | 1.62 (1.05, 2.49) | 0.028  |
|                                 | Family           | 338  |              | 0.75 (0.48, 1.17) | 0.207  |
| <b>Percent_time_shelter</b>     | <=33             | 764  |              | Reference         |        |
|                                 | >=66             | 145  |              | 1.90 (1.13, 3.18) | 0.015  |
|                                 | 33 to 66         | 139  |              | 1.73 (1.11, 2.68) | 0.015  |
| <b>Difficultyaccess_hygiene</b> | No,never,rarely  | 685  |              | Reference         |        |
|                                 | Yes,always,often | 363  |              | 0.74 (0.50, 1.12) | 0.154  |
| <b>Have_FinancialResource</b>   | No               | 459  |              | Reference         |        |
|                                 | Yes              | 589  |              | 0.71 (0.51, 0.98) | 0.037  |
| <b>Tobacco</b>                  | Non smoker       | 452  |              | Reference         |        |
|                                 | Smoker           | 596  |              | 0.47 (0.32, 0.67) | <0.001 |
| <b>Have_Comorb_PsyAddic</b>     | No               | 784  |              | Reference         |        |
|                                 | Yes              | 264  |              | 0.52 (0.32, 0.84) | 0.008  |
| <b>Number_Daily_contact</b>     | <=5              | 634  |              | Reference         |        |
|                                 | >15              | 95   |              | 1.47 (0.70, 3.09) | 0.311  |
|                                 | 5-15             | 319  |              | 1.86 (1.28, 2.70) | 0.001  |

0.5 1 2
